# Supplementary material for: Rhodium-catalyzed multiple C–H activation/highlymeta-selective C–H amination between amidines and alkynes
Source: Royal Society of Chemistry journal article supplement (doi:10.1039/d0cc04885b), 2020-01-01

## ***Supporting Information***

### **Rhodium-Catalyzed Multiple C–H Activation/Highly *meta*-Selective C–H Amination between Amidines and Alkynes**

Fen Xu,\* Yuan-Yuan Song, Wen-Jing Zhu, Chun-Sen Liu,\* Ya-Zhou Lu, Miao Du\*

*College of Material and Chemical Engineering, Zhengzhou University of Light Industry, Zhengzhou 450002,  
China*

\*E-mail: fenxu\_zzuli@163.com

# Contents

|                                                                                     |                 |
|-------------------------------------------------------------------------------------|-----------------|
| <b>1. General Information .....</b>                                                 | <b>S2</b>       |
| <b>2. Optimization of Reaction Conditions .....</b>                                 | <b>S2–S4</b>    |
| <b>3. Procedure for Rh(III)-Catalyzed Cascade Reactions .....</b>                   | <b>S4</b>       |
| <b>4. Characterization of Products .....</b>                                        | <b>S5–S13</b>   |
| <b>5. Procedures of Mechanistic Studies .....</b>                                   | <b>S14–S23</b>  |
| <b>6. References .....</b>                                                          | <b>S24</b>      |
| <b>7. Single-Crystal X-Ray Crystallography .....</b>                                | <b>S25–S28</b>  |
| <b>8. Copy of NMR (<sup>1</sup>H, <sup>13</sup>C, <sup>19</sup>F) Spectra .....</b> | <b>S29–S84</b>  |
| <b>9. Copy of HRMS Spectra .....</b>                                                | <b>S85–S109</b> |

## 1. General Information

Unless otherwise noted, all the rhodium-catalyzed reactions were carried out under air condition. The commercially available chemicals and solvents were used as received without further purification. Alkynes were prepared according to the published procedure.<sup>S1-S5</sup> Amidines were obtained from corresponding nitriles and amines.<sup>S6</sup> The reactions were monitored by TLC using UV-light or by staining with iodine. Column chromatography was performed on silica gel (200-300 mesh). Single-crystal X-ray data in this work were collected on an Agilent Technologies SuperNova Single Crystal Diffractometer at different temperatures equipped with graphite-monochromatic Mo K $\alpha$  or Cu K $\alpha$  radiation ( $\lambda$  = 0.71073 Å or 1.54184 Å). The structures were solved by SHELXS (direct methods) and refined by SHELXL (full matrix least-squares techniques) in the Olex2 package.<sup>S7</sup> All non-hydrogen atoms were refined with anisotropic displacement parameters. Hydrogen atoms attached to carbon were placed in geometrically idealized positions and refined using a riding model. <sup>1</sup>H, <sup>13</sup>C, and <sup>19</sup>F NMR were recorded on a 600 or 400 MHz Bruker NMR spectrometer in CDCl<sub>3</sub> (7.26 ppm for <sup>1</sup>H and 77.16 ppm for <sup>13</sup>C) using tetramethylsilane (TMS) as the internal standard(s = singlet, d = doublet, t = triplet, q = quartet, dd = doublet of doublets, m = multiplet). High-resolution mass spectra HRMS data were obtained with Micromass HPLC–Q–TOF mass spectrometer.

## 2. Optimization of Reaction Conditions

To initiate our investigation, *N*-phenylbenzimidamide **1a** and diphenylacetylene **2a** were chosen as model substrates. The effect of varying different reaction parameters on the reaction efficiency was evaluated (Table S1). We first commence the reaction of **1a** (0.125 mmol) and **2a** (3 equiv) with [Cp\*RhCl<sub>2</sub>]<sub>2</sub> as the catalyst precursor, and Mn(OAc)<sub>3</sub>•2H<sub>2</sub>O as the oxidant in tert-amyl alcohol at 80 °C. To our surprise, the reaction gave the heterocyclic product **3aa** in 24% yield, albeit with *N*-substituted 1-aminoisoquinolines side product (entry 1). Subsequent screening of solvents revealed that DCE performed the best with an increase in the yield to 44% (entries 2-7). Decreasing the amount of Mn(OAc)<sub>3</sub>•2H<sub>2</sub>O to 2 equiv resulted in the formation of **3aa** in 27% yield, while increasing the loading of Mn(OAc)<sub>3</sub>•2H<sub>2</sub>O to 8 equiv furnished **3aa** in 43% yield (entries 8-9). Interestingly, the yield of **3aa** could be increased to 64% upon the addition of PhCN

as the additive, which was proved to facilitate and stabilize the formation of the five-membered cyclometalated intermediate during the process. To our delight, the desired product **3aa** was obtained in 79% yield when 20 mol% KO<sup>t</sup>Bu was used, whereas the yield of **3aa** dropped significantly upon further increasing the amount of KO<sup>t</sup>Bu to 40 mol% (entries 11 and 12). Inspired by this result, we screened other bases, such as DBU and DMAP, but resulted in attenuated reactivity (entries 13 and 14). Conversely, 2,2-bipyridine and PhNH<sub>2</sub> failed to give desired product **3aa**. It is probably attributed to either chelation of the catalyst or competitive pyridine or NH<sub>2</sub>-directed C-H bond activations (entries 15 and 16). Notably, Mn(OAc)<sub>3</sub>•2H<sub>2</sub>O turned out to be an indispensable reaction parameter for this cascade, as no reaction proceeded in the absence of Mn(OAc)<sub>3</sub>•2H<sub>2</sub>O or in the present of other oxidants (entries 17-21). Further optimization showed that the reaction did not occur without the [Cp<sup>\*</sup>RhCl<sub>2</sub>]<sub>2</sub> (entry 22). Thus, the optimal reaction conditions were set as [Cp<sup>\*</sup>RhCl<sub>2</sub>]<sub>2</sub> (2.5 mol%), Mn(OAc)<sub>3</sub>•2H<sub>2</sub>O (6 equiv), PhCN (20 mol %), and KO<sup>t</sup>Bu (20 mol %), in DCE at 40 °C for 48 h.

**Table S1. Optimization of Reaction Conditions<sup>[a]</sup>**

| entry               | oxidant                                 | solvent                            | additive                | yield<br>(%) <sup>[b]</sup> |
|---------------------|-----------------------------------------|------------------------------------|-------------------------|-----------------------------|
| 1                   | Mn(OAc) <sub>3</sub> •2H <sub>2</sub> O | tert amyl alcohol                  |                         | 24                          |
| 2                   | Mn(OAc) <sub>3</sub> •2H <sub>2</sub> O | CF <sub>3</sub> CH <sub>2</sub> OH |                         | ND                          |
| 3                   | Mn(OAc) <sub>3</sub> •2H <sub>2</sub> O | NMP                                |                         | N.D.                        |
| 4                   | Mn(OAc) <sub>3</sub> •2H <sub>2</sub> O | DMF                                |                         | N.D.                        |
| 5                   | Mn(OAc) <sub>3</sub> •2H <sub>2</sub> O | CH <sub>3</sub> CN                 |                         | 7                           |
| 6                   | Mn(OAc) <sub>3</sub> •2H <sub>2</sub> O | dioxane                            |                         | <5                          |
| 7                   | Mn(OAc) <sub>3</sub> •2H <sub>2</sub> O | DCE                                |                         | 44                          |
| 8 <sup>[c]</sup>    | Mn(OAc) <sub>3</sub> •2H <sub>2</sub> O | DCE                                |                         | 27                          |
| 9 <sup>[d]</sup>    | Mn(OAc) <sub>3</sub> •2H <sub>2</sub> O | DCE                                |                         | 43                          |
| 10 <sup>[e]</sup>   | Mn(OAc) <sub>3</sub> •2H <sub>2</sub> O | DCE                                | PhCN                    | 64                          |
| 11 <sup>[e]</sup>   | Mn(OAc) <sub>3</sub> •2H <sub>2</sub> O | DCE                                | PhCN/KO <sup>t</sup> Bu | 79                          |
| 12 <sup>[e,f]</sup> | Mn(OAc) <sub>3</sub> •2H <sub>2</sub> O | DCE                                | PhCN/KO <sup>t</sup> Bu | 49                          |

|                     |                                        |     |                         |      |
|---------------------|----------------------------------------|-----|-------------------------|------|
| 13 <sup>[e]</sup>   | Mn(OAc) <sub>3</sub> 2H <sub>2</sub> O | DCE | PhCN/DBU                | 28   |
| 14 <sup>[e]</sup>   | Mn(OAc) <sub>3</sub> 2H <sub>2</sub> O | DCE | PhCN/DMAP               | 42   |
| 15 <sup>[e]</sup>   | Mn(OAc) <sub>3</sub> 2H <sub>2</sub> O | DCE | PhCN/2,2-bipyridin      | N.D. |
| e                   |                                        |     |                         |      |
| 16 <sup>[e]</sup>   | Mn(OAc) <sub>3</sub> 2H <sub>2</sub> O | DCE | PhCN/PhNH <sub>2</sub>  | N.D. |
| 17 <sup>[e]</sup>   | TBHP                                   | DCE | PhCN/KO <sup>t</sup> Bu | N.D. |
| 18 <sup>[e]</sup>   | MnO <sub>2</sub>                       | DCE | PhCN/KO <sup>t</sup> Bu | N.D. |
| 19 <sup>[e]</sup>   | BQ                                     | DCE | PhCN/KO <sup>t</sup> Bu | N.D. |
| 20 <sup>[e]</sup>   | Cu(OAc) <sub>2</sub>                   | DCE | PhCN/KO <sup>t</sup> Bu | N.D. |
| 21 <sup>[e]</sup>   | — —                                    | DCE | PhCN/KO <sup>t</sup> Bu | N.D. |
| 22 <sup>[e,g]</sup> | Mn(OAc) <sub>3</sub> 2H <sub>2</sub> O | DCE | PhCN/KO <sup>t</sup> Bu | N.D  |

Reaction conditions: <sup>[a]</sup> [Cp\*RhCl<sub>2</sub>]<sub>2</sub> (0.0032 mmol, 2.5%), amidine **1a** (0.125 mmol, 24.5 mg), alkyne **2a** (0.375mmol, 66.8 mg), oxidant (6 equiv) base (20%), PhCN (20%, 25.6 uL), solvent (2 mL), 80 °C, 48 h. <sup>[b]</sup> Isolated yield. <sup>[c]</sup> Mn(OAc)<sub>3</sub> 2H<sub>2</sub>O (2 equiv). <sup>[d]</sup> Mn(OAc)<sub>3</sub> 2H<sub>2</sub>O (8 equiv). <sup>[e]</sup> Solvent (4 mL), 40 °C. <sup>[f]</sup> KO<sup>t</sup>Bu (40%). <sup>[g]</sup> without [Cp\*RhCl<sub>2</sub>]<sub>2</sub>.

### 3. Procedure for Rh(III)-Catalyzed Cascade Reactions

A mixture of [Cp\*RhCl<sub>2</sub>]<sub>2</sub> (0.0032 mmol, 2.5%), alkynes **2a-2o** (0.375 mmol), amidines **1a-1n** (0.125 mmol), Mn(OAc)<sub>3</sub> 2H<sub>2</sub>O (6 equiv, 201.1 mg), KO<sup>t</sup>Bu (20%), PhCN (20%, 25.6 uL), DCE (4 mL) was stirred at 40 °C for 48 h. After cooling the reaction to room temperature, the solvent was removed under vacuum and the residue was purified by silica gel chromatography using petroleum ether/ethyl acetate = 10:1-4:1 to afford desired products.

## 4. Characterization of Products

### **N-(3,4-diphenylisoquinolin-1-yl)-N,5,6-triphenylbenzo[4,5]imidazo[2,1-a]isoquinolin-9-amine (3aa).**

Yellow solid (isolated yield 79%). mp 187.5-188.2 °C. Petroleum ether/ethyl acetate = 6:1. <sup>1</sup>H NMR (400 MHz, CDCl<sub>3</sub>) δ = 9.00 (d, *J*=8.0 Hz, 1H), 7.96 (d, *J*=8.8 Hz, 1H), 7.72 (dd, *J*=16.6 Hz, 9.0 Hz, 3H), 7.58 (t, *J*=7.7 Hz, 1H), 7.50 (ddd, *J*=8.4 Hz, 6.9 Hz, 1.1 Hz, 1H), 7.48 – 7.41 (m, 4H), 7.37 (d, *J*=7.7 Hz, 2H), 7.32 (d, *J*=8.1 Hz, 1H), 7.28 – 7.20 (m, 6H), 7.19 – 7.13 (m, 4H), 7.13 – 7.07 (m, 3H), 7.07 – 6.99 (m, 5H), 6.80 (t, *J*=7.7 Hz, 2H), 6.71 (t, *J*=7.0 Hz, 1H), 5.51 (s, 1H). <sup>13</sup>C NMR (101 MHz, CDCl<sub>3</sub>) δ = 170.3, 156.8, 148.7, 148.3, 147.5, 142.8, 140.2, 139.3, 138.7, 137.8, 135.6, 135.0, 133.0, 132.4, 131.5, 131.5, 131.4, 131.4, 130.3, 129.9, 129.8, 129.0, 128.6, 128.3, 128.0, 127.9, 127.8, 127.5, 127.4, 127.2, 127.0, 126.4, 126.3, 126.2, 126.1, 124.9, 123.6, 123.0, 122.7, 122.2, 119.5, 119.5, 114.9, 110.0. HRMS Calculated for C<sub>54</sub>H<sub>37</sub>N<sub>4</sub><sup>+</sup>, 741.3018, found 741.3013.

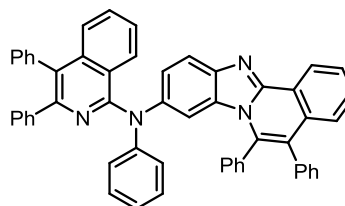

### **3-bromo-N-(6-bromo-3,4-diphenylisoquinolin-1-yl)-N,5,6-triphenylbenzo[4,5]imidazo[2,1-a]isoquinolin-9-amine (3ba).**

Yellow solid (isolated yield 72%). mp 121.6-123.5 °C. Petroleum ether/ethyl acetate = 4:1. <sup>1</sup>H NMR (400 MHz, CDCl<sub>3</sub>) δ = 8.88 (d, *J*=8.4 Hz, 1H), 7.96 (d, *J*=8.8 Hz, 1H), 7.85 – 7.79 (m, 2H), 7.59 (d, *J*=9.0 Hz, 1H), 7.49 – 7.43 (m, 4H), 7.41 (dd, *J*=8.8 Hz, 2.1 Hz, 1H), 7.35 – 7.30 (m, 3H), 7.26 (dd, *J*=9.7 Hz, 5.4 Hz, 5H), 7.15 (dd, *J*=7.6 Hz, 1.7 Hz, 2H), 7.13 – 7.08 (m, 5H), 7.07 – 7.03 (m, 3H), 6.99 (d, *J*=7.7 Hz, 2H), 6.85 (t, *J*=7.5 Hz, 2H), 6.77 (t, *J*=7.5 Hz, 1H), 5.50 (d, *J*=2.0 Hz, 1H). <sup>13</sup>C NMR (101 MHz, CDCl<sub>3</sub>) δ = 185.0, 176.9, 169.6, 163.0, 156.8, 149.9, 148.0, 147.0, 145.5, 142.9, 140.6, 139.8, 137.1, 136.1, 135.5, 134.7, 133.9, 132.7, 131.4, 131.3, 131.3, 130.4, 130.4, 129.8, 129.7, 129.2, 128.8, 128.5, 128.4, 128.2, 128.0, 127.7, 127.6, 127.5, 127.3, 126.8, 126.6, 125.0, 123.9, 123.2, 122.6, 121.3, 119.6, 110.0. HRMS Calculated for C<sub>54</sub>H<sub>35</sub>Br<sub>2</sub>N<sub>4</sub><sup>+</sup>, 899.1228, found 899.1220.

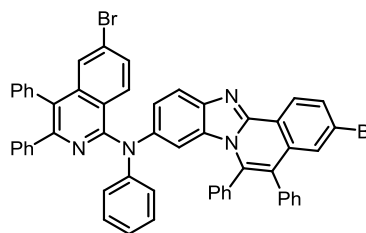

### **3-chloro-N-(6-chloro-3,4-diphenylisoquinolin-1-yl)-N,5,6-triphenylbenzo[4,5]imidazo[2,1-a]isoquinolin-9-amine (3ca).**

Yellow solid (isolated yield 57%). mp 131.3-132.5 °C. Petroleum ether/ethyl acetate = 4:1. <sup>1</sup>H NMR (400 MHz, CDCl<sub>3</sub>) δ = 8.93 (d, *J*=8.2 Hz, 1H), 7.93 (d, *J*=8.8 Hz, 1H), 7.63 (m, 3H), 7.47 – 7.40 (m, 3H), 7.38 (dd, *J*=8.8 Hz, 2.1 Hz, 1H), 7.30 (dd, *J*=7.5 Hz, 1.8 Hz, 2H), 7.27 – 7.19 (m, 6H), 7.17 – 6.99 (m, 11H), 6.96 (d, *J*=7.6 Hz, 2H), 6.82 (t, *J*=7.5 Hz, 2H), 6.74 (dd, *J*=8.5 Hz, 6.4 Hz, 1H), 5.48 (d, *J*=2.0 Hz, 1H). <sup>13</sup>C NMR (101 MHz, CDCl<sub>3</sub>) δ = 164.8, 156.7, 149.9, 148.0, 143.0, 140.3, 139.8, 137.1, 136.2, 136.1, 134.7, 134.1, 133.9, 133.8, 132.7, 131.7, 131.3, 131.2, 130.3, 129.8, 129.6, 129.2, 128.8, 128.5, 128.4, 128.3, 128.2, 128.0, 127.7, 127.6, 127.5, 127.3, 127.1, 126.9, 126.6, 126.3, 125.8, 124.9, 123.9, 123.2, 122.6, 121.1, 119.5, 110.0. HRMS Calculated for C<sub>54</sub>H<sub>35</sub>Cl<sub>2</sub>N<sub>4</sub><sup>+</sup>, 809.2239, found 809.2195.

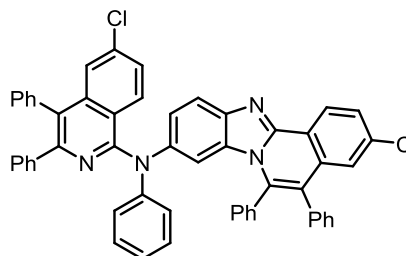

**N-(3,4-diphenyl-6-(trifluoromethyl)isoquinolin-1-yl)-N,5,6-triphenyl-3-(trifluoromethyl)benzo[4,5]imidazo[2,1-a]isoquinolin-9-amine (3da).** Yellow solid (isolated yield 59%). mp 113.2-114.5 °C. Petroleum ether/ethyl acetate = 4:1. <sup>1</sup>H NMR (400 MHz, CDCl<sub>3</sub>) δ = 9.11 (d, *J*=8.2 Hz, 1H), 8.03 – 7.94 (m, 2H), 7.90 (d, *J*=8.5 Hz, 1H), 7.83 (d, *J*=8.8 Hz, 1H), 7.57 (s, 1H), 7.48 – 7.37 (m, 5H), 7.31 (dd, *J*=7.2 Hz, 1.9 Hz, 2H), 7.28 – 7.21 (m, 6H), 7.16 – 7.06 (m, 8H), 7.03 (d, *J*=8.0 Hz, 2H), 6.97 (s, 1H), 6.81 (t, *J*=7.6 Hz, 2H), 6.73 (t, *J*=7.0 Hz, 1H), 5.53 (s, 1H). <sup>13</sup>C NMR (101 MHz, CDCl<sub>3</sub>) δ = 196.4, 175.4, 156.7, 150.2, 147.9, 143.4 (d, *J* = 25.4 Hz), 139.6, 138.6, 136.7, 136.3, 134.4, 133.31 (d, *J* = 23.1 Hz), 132.6, 132.3, 131.5, 130.3, 129.8 (d, *J* = 293.1 Hz), 129.8 (d, *J* = 291.9 Hz), 129.8, 129.3, 128.9, 128.5, 128.1, 127.9, 127.8, 127.6, 127.5, 127.4, 126.4, 126.3, 125.8, 125.3, 125.1, 124.12, 124.05, 123.8, 123.7, 123.7, 123.54, 123.52, 122.82 (d, *J* = 2.2 Hz), 122.4, 121.8 (d, *J* = 3.0 Hz), 120.0, 110.0, 100.0. <sup>19</sup>F NMR (376 MHz, CDCl<sub>3</sub>) δ = -62.40, -62.94. HRMS Calculated for C<sub>56</sub>H<sub>35</sub>F<sub>6</sub>N<sub>4</sub><sup>+</sup>, 877.2766, found 877.2763.

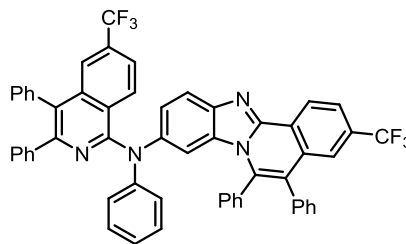

**3-methyl-N-(6-methyl-3,4-diphenylisoquinolin-1-yl)-N,5,6-triphenylbenzo[4,5]imidazo[2,1-a]isoquinolin-9-amine (3ea).**

Yellow solid (isolated yield 60%). mp 229.0-230.6 °C. Petroleum ether/ethyl acetate = 4:1. <sup>1</sup>H NMR (400 MHz, CDCl<sub>3</sub>) δ = 8.83 (d, *J*=8.2, 1H), 7.88 (d, *J*=8.8, 1H), 7.60 (d, *J*=8.6, 1H), 7.50 (dd, *J*=8.3, 1.2, 1H), 7.45 – 7.34 (m, 5H), 7.31 (dd, *J*=7.6, 1.7, 2H), 7.20 (tt, *J*=8.4, 4.0, 5H), 7.12 (ddd, *J*=6.5, 6.0, 2.2, 4H), 7.07 – 6.93 (m, 10H), 6.77 (t, *J*=7.5, 2H), 6.69 (d, *J*=7.5, 1H), 5.47 (d, *J*=1.9, 1H), 2.40 (s, 3H), 2.35 (s, 3H). <sup>13</sup>C NMR (101 MHz, CDCl<sub>3</sub>) δ = 156.7, 148.8, 148.4, 147.8, 142.5, 141.3, 140.4, 140.2, 140.0, 139.5, 138.1, 135.7, 135.1, 133.8, 133.2, 132.5, 132.1, 131.5, 131.4, 130.4, 129.9, 129.4, 129.0, 128.5, 128.4, 128.3, 128.0, 127.44, 127.38, 127.24, 127.17, 126.9, 126.2, 126.1, 124.9, 124.8, 123.5, 123.1, 122.5, 122.1, 121.3, 120.7, 119.3, 110.0, 22.12, 22.07. HRMS Calculated for C<sub>56</sub>H<sub>41</sub>N<sub>4</sub><sup>+</sup>, 769.3331, found 769.3325.

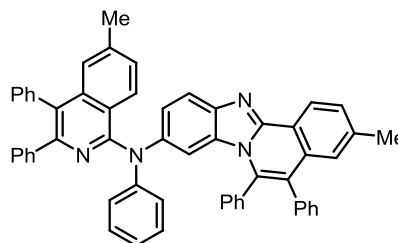

**3-(tert-butyl)-N-(6-(tert-butyl)-3,4-diphenylisoquinolin-1-yl)-N,5,6-triphenylbenzo[4,5]imidazo[2,1-a]isoquinolin-9-amine (3fa).**

Yellow solid (isolated yield 61%). mp 198.6-199.8 °C. Petroleum ether/ethyl acetate = 4:1. <sup>1</sup>H NMR (400 MHz, CDCl<sub>3</sub>) δ = 8.89 (d, *J*=8.4 Hz, 1H), 7.90 (d, *J*=8.8 Hz, 1H), 7.75 (dd, *J*=8.5 Hz, 1.7 Hz, 1H), 7.61 (dd, *J*=5.4 Hz, 3.2, 2H), 7.44 – 7.36 (m, 4H), 7.36 – 7.26 (m, 4H), 7.24 – 7.16 (m, 5H), 7.16 – 7.09 (m, 4H), 7.08 – 7.02 (m, 3H), 6.99 (dt, *J*=6.9 Hz, 4.6, 5H), 6.74 (t, *J*=7.5 Hz, 2H), 6.65 (t, *J*=7.5 Hz, 1H), 5.46 (d, *J*=2.0 Hz, 1H), 1.26 (s, 9H), 1.23 (s, 9H). <sup>13</sup>C NMR (101 MHz, CDCl<sub>3</sub>) δ = 156.3, 153.0, 152.7, 148.8, 148.3, 147.6, 147.5, 142.5, 140.5, 139.3, 138.0, 137.2, 135.6, 135.2, 134.9, 133.2, 132.3, 131.5, 131.38, 131.36, 130.3, 130.0, 128.9, 128.4, 128.2, 128.1, 128.0, 127.8, 127.4, 127.2, 127.1, 126.8, 126.0, 125.9, 125.0, 124.6, 123.5, 122.4, 122.0, 121.3, 121.1, 120.6, 119.3, 109.9, 35.2, 31.1, 30.9. HRMS Calculated for C<sub>62</sub>H<sub>53</sub>N<sub>4</sub><sup>+</sup>, 853.4270, found 853.4265.

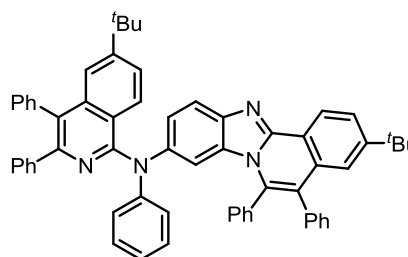

**3-methoxy-N-(6-methoxy-3,4-diphenylisoquinolin-1-yl)-N,5,6-triphenylbenzo[4,5]imidazo[2,1-a]isoquinolin-9-amine**

(3ga). Yellow solid (isolated yield 42%). mp 193.6-194.5 °C.

Petroleum ether/ethyl acetate = 4:1. <sup>1</sup>H NMR (400 MHz, CDCl<sub>3</sub>)

δ = 8.90 (d, *J*=8.8 Hz, 1H), 7.88 (d, *J*=8.8 Hz, 1H), 7.62 (d, *J*=9.3 Hz, 1H), 7.44 – 7.26 (m, 7H), 7.25 – 7.16 (m, 5H), 7.16 –

7.09 (m, 4H), 7.07 – 6.93 (m, 8H), 6.92 (d, *J*=2.4 Hz, 1H), 6.88

– 6.76 (m, 3H), 6.71 (dd, *J*=14.4 Hz, 5.0 Hz, 2H), 5.46 (d, *J*=1.9 Hz, 1H), 3.74 (s, 3H), 3.69 (s, 3H).

<sup>13</sup>C NMR (101 MHz, CDCl<sub>3</sub>) δ = 167.3, 160.9, 160.3, 158.3, 156.5, 153.4, 151.1, 149.4, 148.3, 141.3, 140.4, 138.1, 135.5, 134.4, 133.1, 131.4, 131.3, 131.2, 130.3, 129.9, 128.9, 128.6, 128.3, 128.2, 128.0, 127.4, 127.3, 127.2, 126.9, 126.8, 123.4, 123.1, 122.4, 122.1, 119.0, 118.4, 118.1, 117.4, 116.8, 116.4, 110.0, 108.8, 107.3, 104.6, 55.3, 55.2. HRMS Calculated for C<sub>56</sub>H<sub>41</sub>N<sub>4</sub>O<sub>2</sub><sup>+</sup>, 801.3230, found 801.3224.

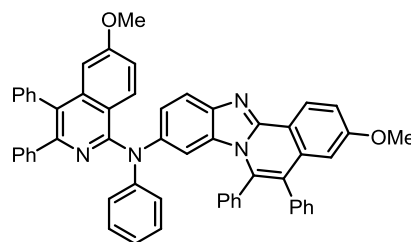

**N-(3,4-diphenyl-6-(trifluoromethoxy)isoquinolin-1-yl)-N,5,6-triphenyl-3-(trifluoromethoxy)benzo[4,5]imidazo[2,1-a]isoquinolin-9-amine (3ha).**

Yellow solid (isolated yield 63%). mp 79.9-81.2 °C. Petroleum ether/ethyl acetate = 4:1.

<sup>1</sup>H NMR (400 MHz, CDCl<sub>3</sub>) δ = 9.03 (d, *J*=8.0 Hz, 1H), 7.94 (d, *J*=8.8 Hz, 1H), 7.74 (d, *J*=9.3 Hz, 1H), 7.54 (d, *J*=8.8 Hz, 1H), 7.48 – 7.36 (m, 5H), 7.30 (dd, *J*=7.5 Hz, 1.8

Hz, 2H), 7.26 – 7.18 (m, 5H), 7.15 – 7.04 (m, 10H), 7.03 – 6.95 (m, 4H), 6.80 (t, *J*=7.4 Hz, 2H), 6.72 (t, *J*=7.4 Hz, 1H), 5.47 (d, *J*=2.0 Hz, 1H). <sup>13</sup>C NMR (101 MHz, CDCl<sub>3</sub>) δ = 156.6, 150.2, 150.0, 149.8,

148.0, 146.7, 143.0, 140.5, 139.7, 137.0, 136.3, 134.6, 134.1, 132.7, 131.7, 131.4, 131.2, 131.1, 130.3, 129.7, 129.5, 129.2, 129.0, 128.8, 128.4, 128.3, 128.2, 127.8, 127.7, 127.6, 127.5, 127.4, 127.1, 122.9 (dd, *J* = 258.5, 1.9 Hz), 124.0, 123.3, 122.9, 122.5, 121.0, 120.6, 119.7, 119.6, 117.79 (dd, *J* = 258.3, 2.2 Hz), 117.8, 116.3, 109.9. <sup>19</sup>F NMR (376 MHz, CDCl<sub>3</sub>) δ = -57.49, -57.58. HRMS Calculated for C<sub>56</sub>H<sub>35</sub>N<sub>4</sub>F<sub>6</sub>O<sub>2</sub><sup>+</sup>, 909.2664, found 909.2659.

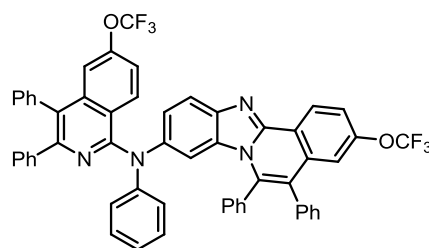

**N,3,5,6-tetraphenyl-N-(3,4,6-triphenylisoquinolin-1-yl)benzo[4,5]imidazo[2,1-a]isoquinolin-9-amine (3ia).**

Yellow solid (isolated yield 49%). mp 225.2-226.5 °C. Petroleum ether/ethyl acetate = 4:1. <sup>1</sup>H NMR (400 MHz, CDCl<sub>3</sub>) δ =

9.04 (d, *J*=8.0 Hz, 1H), 7.94 (dd, *J*=12.7 Hz, 5.3 Hz, 2H), 7.86 (d, *J*=1.2 Hz, 1H), 7.77 (d, *J*=8.8 Hz, 1H), 7.55 – 7.47

(m, 6H), 7.46 – 7.30 (m, 13H), 7.24 – 7.11 (m, 8H), 7.08 (dd, *J*=10.3 Hz, 6.8 Hz, 3H), 7.03 (d, *J*=7.2 Hz, 5H), 6.80 (t, *J*=7.5 Hz, 2H), 6.71 (t, *J*=7.5 Hz, 1H), 5.53 (d, *J*=1.9 Hz, 1H). <sup>13</sup>C NMR (101 MHz, CDCl<sub>3</sub>) δ = 160.7, 156.7, 149.3, 148.3, 142.8, 142.2, 140.5, 140.33,

140.29, 139.7, 137.8, 135.4, 133.0, 132.9, 131.6, 131.4, 131.3, 130.4, 129.9, 129.6, 129.1, 128.94, 128.91, 128.83, 128.78, 128.6, 128.30, 128.28, 128.1, 128.04, 127.99, 127.8, 127.7, 127.5, 127.42, 127.38, 127.3, 127.1, 127.0, 126.9, 126.1, 125.9, 125.5, 124.6, 123.8, 123.7, 122.8, 122.3, 122.1, 119.5, 119.0, 110.0. HRMS Calculated for C<sub>66</sub>H<sub>45</sub>N<sub>4</sub><sup>+</sup>, 893.3644, found 893.3636.

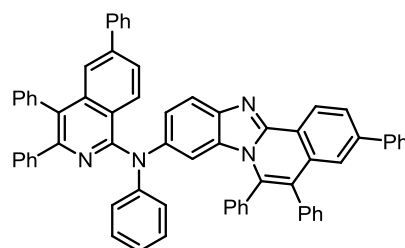



**2-chloro-N-(7-chloro-3,4-diphenylisoquinolin-1-yl)-N,5,6-triphenylbenzo[4,5]imidazo[2,1-a]isoquinolin-9-amine (3ja).**

Yellow solid (isolated yield 54%). mp 182.6-183.9 °C. Petroleum ether/ethyl acetate = 4:1. <sup>1</sup>H NMR (400 MHz, CDCl<sub>3</sub>) δ = 8.94 (d, *J*=2.1, 1H), 7.92 (d, *J*=8.8, 1H), 7.69 (d, *J*=2.0, 1H), 7.59 (d, *J*=9.1, 1H), 7.46 (dd, *J*=8.7, 2.2, 1H), 7.44 – 7.35 (m, 5H), 7.29 (dd, *J*=7.4, 1.9, 2H), 7.23 (dd, *J*=8.2, 5.6, 6H), 7.15 – 6.99 (m, 10H), 6.94 (d, *J*=7.6, 2H), 6.82 (t, *J*=7.6, 2H), 6.71 (s, 1H), 5.50 (d, *J*=2.0, 1H). <sup>13</sup>C NMR (101 MHz, CDCl<sub>3</sub>) δ = 149.1, 147.9, 142.7, 140.9, 139.8, 137.6, 137.3, 135.2, 133.9, 132.9, 132.0, 131.6, 131.3, 131.2, 130.6, 130.3, 129.9, 129.2, 128.7, 128.4, 128.3, 128.1, 128.0, 127.5, 127.4, 127.2, 125.1, 124.2, 123.6, 123.1, 122.7, 122.4, 120.0, 110.0. HRMS Calculated for C<sub>54</sub>H<sub>35</sub>Cl<sub>2</sub>N<sub>4</sub><sup>+</sup>, 809.2239, found 809.2244.

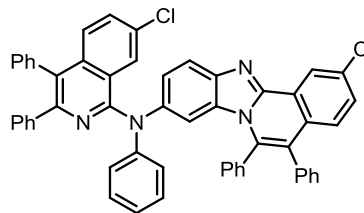

**11-chloro-N-(2-chlorophenyl)-N-(3,4-diphenylisoquinolin-1-yl)-5,6-diphenylbenzo[4,5]imidazo[2,1-a]isoquinolin-9-amine (3ka).**

Yellow solid (isolated yield 51%). mp 206.8-209.6 °C. Petroleum ether/ethyl acetate = 4:1. <sup>1</sup>H NMR (400 MHz, CDCl<sub>3</sub>) δ = 9.11 (d, *J*=6.9 Hz, 1H), 7.72 – 7.62 (m, 3H), 7.61 – 7.49 (m, 1H), 7.48 – 7.35 (m, 5H), 7.34 – 7.26 (m, 3H), 7.25 – 7.17 (m, 5H), 7.17 – 7.08 (m, 6H), 7.08 – 7.00 (m, 4H), 7.00 – 6.94 (m, 2H), 6.85 (t, *J*=7.4 Hz, 1H), 6.78 (t, *J*=7.2 Hz, 2H), 5.32 (d, *J*=1.9 Hz, 1H). <sup>13</sup>C NMR (101 MHz, CDCl<sub>3</sub>) δ = 171.2, 155.5, 148.0, 145.0, 142.7, 140.2, 139.1, 137.8, 136.0, 135.3, 134.8, 132.6, 132.4, 132.0, 131.4, 131.3, 131.0, 130.6, 130.3, 130.1, 129.9, 129.7, 129.6, 128.5, 128.4, 128.2, 128.0, 127.9, 127.7, 127.7, 127.4, 127.3, 126.9, 126.3, 126.18, 126.15, 126.1, 126.0, 125.5, 124.2, 124.13, 124.10, 122.8, 122.0, 121.1, 107.4. HRMS Calculated for C<sub>54</sub>H<sub>35</sub>Cl<sub>2</sub>N<sub>4</sub><sup>+</sup>, 809.2239, found 809.2233.

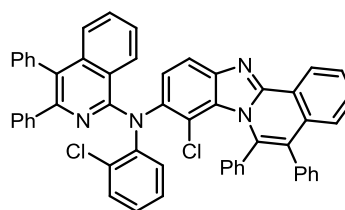

**N-(3,4-diphenylisoquinolin-1-yl)-11-methyl-5,6-diphenyl-N-(o-tolyl)benzo[4,5]imidazo[2,1-a]isoquinolin-9-amine (3la).**

Yellow solid (isolated yield 41%). mp 205.7-207.1 °C. Petroleum ether/ethyl acetate = 6:1. <sup>1</sup>H NMR (400 MHz, CDCl<sub>3</sub>) δ 9.03 (s, 1H), 7.69 – 7.57 (m, 3H), 7.51 (t, *J* = 7.2 Hz, 1H), 7.45 – 7.36 (m, 4H), 7.31 (d, *J* = 6.4 Hz, 2H), 7.24 – 7.16 (m, 5H), 7.16 – 6.98 (m, 11H), 6.98 – 6.89 (m, 3H), 6.83 (t, *J* = 7.4 Hz, 1H), 6.75 (t, *J* = 7.2 Hz, 2H), 5.22 (d, *J* = 1.8 Hz, 1H), 2.80 (s, 3H), 1.95 (s, 3H). <sup>13</sup>C NMR (101 MHz, CDCl<sub>3</sub>) δ = 156.5, 147.9, 147.0, 146.7, 143.3, 140.4, 139.1, 138.2, 135.7, 135.1, 134.4, 133.0, 132.4, 132.2, 131.4, 131.3, 131.1, 131.0, 130.3, 130.0, 129.8, 129.6, 129.5, 129.3, 128.5, 128.2, 128.0, 127.9, 127.6, 127.3, 127.2, 127.1, 126.8, 126.5, 126.2, 126.1, 126.0, 125.7, 125.0, 123.1, 121.9, 121.8, 112.8, 106.3, 19.0, 17.3. HRMS Calculated for C<sub>56</sub>H<sub>41</sub>N<sub>4</sub><sup>+</sup>, 769.3331, found 769.3326.

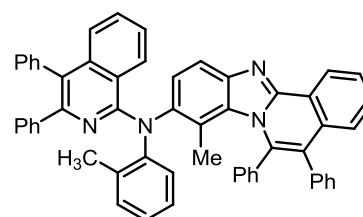

**N-(7,8-diphenyl-[1,3]dioxolo[4,5-g]isoquinolin-5-yl)-N,5,6-triphenylbenzo[4,5]imidazo[2,1-a][1,3]dioxolo[4,5-g]isoquinolin-9-amine (3ma).**

Yellow solid (isolated yield 74%). mp 141.8-143.1 °C. Petroleum ether/ethyl acetate = 4:1. <sup>1</sup>H NMR (400 MHz, CDCl<sub>3</sub>) δ = 8.57 (d, *J*=8.4 Hz, 1H), 7.83 (d,

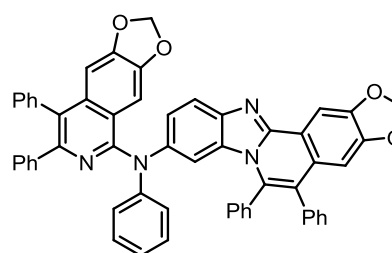

$J=8.8$  Hz, 1H), 7.43 (d,  $J=8.9$  Hz, 1H), 7.35 – 7.26 (m, 6H), 7.24 – 7.16 (m, 3H), 7.14 – 7.07 (m, 5H), 7.07 – 6.97 (m, 8H), 6.96 – 6.88 (m, 3H), 6.83 (t,  $J=7.5$  Hz, 2H), 6.74 (t,  $J=7.5$  Hz, 1H), 5.81 (s, 2H), 5.75 (s, 2H), 5.38 (d,  $J=2.0$  Hz, 1H).  $^{13}\text{C}$  NMR (101 MHz,  $\text{CDCl}_3$ )  $\delta$  = 157.0, 149.5, 148.9, 148.3, 147.4, 143.0, 142.5, 141.6, 140.1, 138.5, 136.5, 135.7, 132.7, 131.7, 131.2, 131.1, 130.3, 130.1, 129.0, 128.3, 128.1, 127.4, 127.3, 127.1, 127.0, 126.87, 126.86, 125.6, 123.6, 123.3, 122.5, 122.1, 121.9, 119.9, 119.819, 119.2, 119.1, 118.1, 117.0, 110.7, 110.1, 109.8, 101.4, 101.3. HRMS Calculated for  $\text{C}_{56}\text{H}_{37}\text{N}_4\text{O}_4^+$ , 829.2815, found 829.2809.

**N-(4,5-diphenylthieno[2,3-c]pyridin-7-yl)-N,4,5-triphenylbenzo[4,5]imidazo[1,2-a]thieno[2,3-c]pyridin-8-amine (3na).**

Yellow solid (isolated yield 35%). mp 133.0-134.7 °C. Petroleum ether/ethyl acetate = 4:1.  $^1\text{H}$  NMR (400 MHz,  $\text{CDCl}_3$ )  $\delta$  7.92 (d,  $J$  = 8.8 Hz, 1H), 7.60 (d,  $J$  = 5.2 Hz, 1H), 7.43 (dd,  $J$  = 8.8 Hz, 2.0 Hz, 1H), 7.40 – 7.26 (m, 8H), 7.24 – 7.15 (m, 7H), 7.14 – 6.99 (m, 10H), 6.89 – 6.79 (m, 3H), 5.63 (d,  $J$  = 1.9 Hz, 1H).  $^{13}\text{C}$  NMR (101 MHz,  $\text{CDCl}_3$ )  $\delta$  = 151.5, 149.7, 149.3, 149.0, 148.7, 145.7, 142.1, 140.3, 139.9, 138.9, 138.7, 135.9, 134.9, 132.5, 131.7, 130.8, 130.7, 130.4, 130.1, 129.3, 128.8, 128.5, 128.5, 128.0, 127.6, 127.3, 127.1, 127.1, 126.2, 125.6, 125.4, 125.3, 125.1, 124.2, 123.8, 123.3, 121.5, 121.5, 119.2, 112.8. HRMS Calculated for  $\text{C}_{50}\text{H}_{33}\text{N}_4\text{S}_2^+$ , 753.2147, found 753.2141.

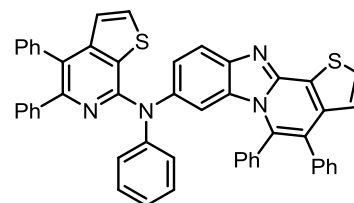

**N-(3,4-bis(4-fluorophenyl)isoquinolin-1-yl)-5,6-bis(4-fluorophenyl)-N-phenylbenzo[4,5]imidazo[2,1-a]isoquinolin-9-amine (3ab).**

Yellow solid (isolated yield 70%). mp 188.8-190.3 °C. Petroleum ether/ethyl acetate = 4:1.  $^1\text{H}$  NMR (400 MHz,  $\text{CDCl}_3$ )  $\delta$  = 8.97 (d,  $J=7.7$  Hz, 1H), 7.94 (d,  $J=8.8$  Hz, 1H), 7.69 (dd,  $J=7.8$  Hz, 4.2 Hz, 2H), 7.64 – 7.53 (m, 2H), 7.51 – 7.45 (m, 1H), 7.36 (dd,  $J=8.8$  Hz, 2.1 Hz, 1H), 7.33 – 7.19 (m, 2H), 7.16 – 7.03 (m, 7H), 7.03 – 6.89 (m, 6H), 6.75 (dd,  $J=12.2$  Hz, 5.4 Hz, 2H), 6.50 (t,  $J=8.6$  Hz, 2H), 5.73 (d,  $J=2.0$  Hz, 1H).  $^{13}\text{C}$  NMR (101 MHz,  $\text{CDCl}_3$ )  $\delta$  = 162.28 (d,  $J$  = 250.4 Hz), 162.15 (d,  $J$  = 247.0 Hz), 161.98 (d,  $J$  = 247.1 Hz), 161.91 (d,  $J$  = 247.3 Hz), 156.7, 154.7, 148.3, 147.8, 147.5, 143.0, 139.2, 136.15 (d,  $J$  = 3.2 Hz), 134.2, 133.53 (d,  $J$  = 3.5 Hz), 133.04 (d,  $J$  = 8.1 Hz), 132.92 (d,  $J$  = 8.1 Hz), 132.2, 132.03 (d,  $J$  = 8.1 Hz), 131.80 (d,  $J$  = 8.3 Hz), 131.3, 129.9, 129.3, 129.1, 128.96 (d,  $J$  = 3.2 Hz), 128.8, 128.2, 126.5, 126.3, 126.18 (d,  $J$  = 2.9 Hz), 125.9, 124.9, 124.6, 123.6, 123.0, 122.5, 122.4, 119.7, 115.67 (d,  $J$  = 21.3 Hz), 115.65 (d,  $J$  = 21.8 Hz), 115.23 (d,  $J$  = 21.4 Hz), 114.45 (d,  $J$  = 21.4 Hz), 109.4.  $^{19}\text{F}$  NMR (376 MHz,  $\text{CDCl}_3$ )  $\delta$  = -108.37, -109.39, -114.22, -114.54, -115.07. HRMS Calculated for  $\text{C}_{54}\text{H}_{33}\text{F}_4\text{N}_4^+$ , 813.2641, found 813.2636.

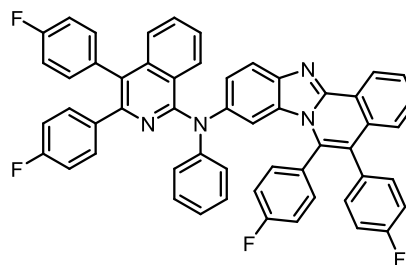

**N-(3,4-bis(4-chlorophenyl)isoquinolin-1-yl)-5,6-bis(4-chlorophenyl)-N-phenylbenzo[4,5]imidazo[2,1-a]isoquinolin-9-amine (3ac).**

Yellow solid (isolated yield 46%). mp 125.3-126.6 °C. Petroleum ether/ethyl acetate = 4:1.  $^1\text{H}$  NMR (400 MHz,  $\text{CDCl}_3$ )  $\delta$  = 9.00 (d,  $J=7.7$  Hz, 1H), 7.93 (d,

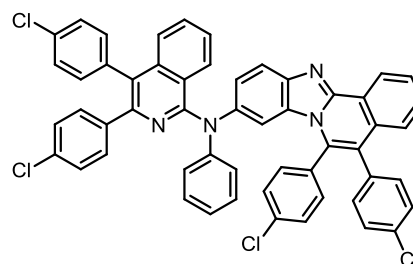

$J=8.8$  Hz, 1H), 7.70 (dd,  $J=12.0$  Hz, 6.0 Hz, 2H), 7.62 – 7.54 (m, 2H), 7.50 – 7.44 (m, 1H), 7.43 – 7.38 (m, 2H), 7.34 – 7.17 (m, 9H), 7.11 (t,  $J=7.4$  Hz, 1H), 7.08 – 6.94 (m, 10H), 6.87 (d,  $J=8.4$  Hz, 2H), 5.92 (d,  $J=1.9$  Hz, 1H).  $^{13}\text{C}$  NMR (101 MHz,  $\text{CDCl}_3$ )  $\delta$  = 168.1, 156.9, 148.1, 147.2, 143.4, 139.0, 138.4, 136.0, 135.2, 133.8, 133.7, 133.6, 133.5, 133.2, 132.8, 132.6, 131.9, 131.6, 131.4, 131.1, 131.1, 130.1, 130.0, 129.3, 128.9, 128.9, 128.5, 128.4, 127.8, 126.4, 126.32, 126.29, 126.1, 125.9, 125.09, 125.08, 124.6, 123.9, 123.1, 123.0, 122.8, 122.2, 119.5, 109.9. HRMS Calculated for  $\text{C}_{54}\text{H}_{33}\text{Cl}_4\text{N}_4^+$ , 877.1459, found 877.1448.

**N-(3,4-bis(4-bromophenyl)isoquinolin-1-yl)-5,6-bis(4-bromophenyl)-N-phenylbenzo[4,5]imidazo[2,1-a]isoquinolin-9-amine (3ad).**

Yellow solid (isolated yield 33%). mp 257.2–258.6 °C. Petroleum ether/ethyl acetate = 4:1.  $^1\text{H}$  NMR (400 MHz,  $\text{CDCl}_3$ )  $\delta$  = 8.94 (d,  $J=8.0$  Hz, 1H), 7.89 (d,  $J=8.8$  Hz, 1H), 7.69 (t,  $J=7.8$  Hz, 2H), 7.54 (dd,  $J=10.5$  Hz, 4.7 Hz, 4H), 7.45 (dd,  $J=8.2$  Hz, 7.1 Hz, 1H), 7.39 (d,  $J=8.3$  Hz, 2H), 7.31 – 7.15 (m, 9H), 7.12 (t,  $J=7.4$  Hz, 1H), 7.05 (d,  $J=8.4$  Hz, 2H), 7.02 – 6.90 (m, 8H), 5.96 (d,  $J=1.9$  Hz, 1H).  $^{13}\text{C}$  NMR (101 MHz,  $\text{CDCl}_3$ )  $\delta$  = 157.0, 148.3, 147.7, 147.1, 143.2, 141.0, 138.93, 138.88, 136.6, 134.4, 133.9, 133.1, 133.0, 132.0, 131.9, 131.8, 131.7, 131.6, 131.5, 131.3, 130.7, 130.0, 129.9, 129.3, 128.2, 126.4, 126.2, 126.1, 125.9, 124.9, 124.6, 123.9, 123.5, 123.2, 123.0, 122.6, 122.2, 121.8, 121.7, 121.6, 119.8, 110.1. HRMS Calculated for  $\text{C}_{54}\text{H}_{33}\text{Br}_4\text{N}_4^+$ , 1052.9439, found 1052.9411.

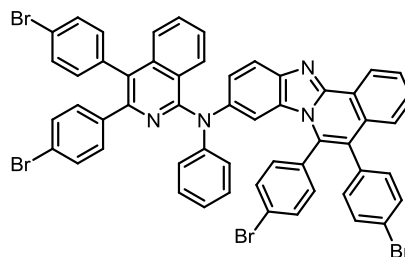

**N-(3,4-di-p-tolylisoquinolin-1-yl)-N-phenyl-5,6-di-p-tolylbenzo[4,5]imidazo[2,1-a]isoquinolin-9-amine (3ae).**

Yellow solid (isolated yield 55%). mp 154.9–155.8 °C. Petroleum ether/ethyl acetate = 4:1.  $^1\text{H}$  NMR (400 MHz,  $\text{CDCl}_3$ )  $\delta$  = 9.17 (d,  $J=7.4$  Hz, 1H), 8.08 (d,  $J=8.8$  Hz, 1H), 7.91 – 7.82 (m, 3H), 7.78 – 7.71 (m, 1H), 7.65 – 7.60 (m, 1H), 7.52 (d,  $J=8.1$  Hz, 1H), 7.50 – 7.36 (m, 10H), 7.26 – 7.14 (m, 9H), 7.06 (d,  $J=8.0$  Hz, 2H), 6.91 (d,  $J=7.8$  Hz, 2H), 6.05 (d,  $J=1.9$  Hz, 1H), 2.65 (s, 3H), 2.51 (s, 3H), 2.41 (s, 3H), 2.02 (s, 3H).  $^{13}\text{C}$  NMR (101 MHz,  $\text{CDCl}_3$ )  $\delta$  = 156.6, 148.5, 148.4, 147.9, 142.8, 140.9, 139.4, 138.7, 137.4, 136.8, 136.6, 136.5, 135.3, 135.0, 132.8, 132.8, 131.7, 131.3, 131.2, 130.3, 130.2, 129.9, 129.5, 129.4, 129.3, 129.1, 128.9, 128.7, 128.2, 127.5, 127.1, 126.4, 126.21, 126.17, 125.8, 124.7, 123.7, 123.12, 123.10, 122.7, 122.6, 122.5, 119.4, 110.8. HRMS Calculated for  $\text{C}_{58}\text{H}_{45}\text{N}_4^+$ , 797.3644, found 797.3639.

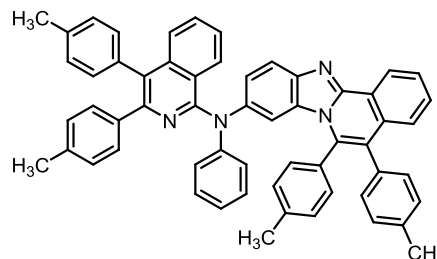

**N-(3,4-bis(4-ethylphenyl)isoquinolin-1-yl)-5,6-bis(4-ethylphenyl)-N-phenylbenzo[4,5]imidazo[2,1-a]isoquinolin-9-amine (3af).**

Yellow solid (isolated yield 38%). mp 110.8–112.5 °C. Petroleum ether/ethyl acetate = 4:1.  $^1\text{H}$  NMR (400 MHz,  $\text{CDCl}_3$ )  $\delta$  = 8.99 (d,  $J=7.9$  Hz, 1H), 7.88 (d,  $J=8.8$  Hz, 1H), 7.66 (dd,  $J=11.7$  Hz, 4.6 Hz, 2H), 7.61 (d,  $J=8.5$  Hz, 1H), 7.59 – 7.50 (m, 1H), 7.40 (ddd,  $J=8.3$  Hz, 6.9 Hz, 1.1 Hz, 1H), 7.34 (d,  $J=8.1$  Hz, 1H), 7.25 – 7.14 (m, 8H), 7.08 – 7.00 (m, 8H), 6.98 (t,  $J=7.3$  Hz, 1H), 6.92 (d,  $J=7.6$  Hz, 2H), 6.85 (d,  $J=8.2$

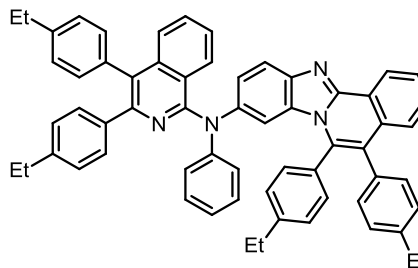

Hz, 2H), 6.74 (d,  $J=8.0$  Hz, 2H), 5.96 (d,  $J=2.0$  Hz, 1H), 2.73 (q,  $J=7.6$  Hz, 2H), 2.58 (q,  $J=7.6$  Hz, 2H), 2.48 (q,  $J=7.6$  Hz, 2H), 2.12 (q,  $J=7.6$  Hz, 2H), 1.31 (t,  $J=7.6$  Hz, 3H), 1.18 (t,  $J=7.6$  Hz, 3H), 1.09 (t,  $J=7.6$  Hz, 3H), 0.88 (dd,  $J=7.2$  Hz, 3.2 Hz, 3H).  $^{13}\text{C}$  NMR (101 MHz,  $\text{CDCl}_3$ )  $\delta$  = 158.6, 156.5, 148.6, 148.3, 147.7, 144.8, 143.1, 142.9, 142.8, 142.7, 140.4, 139.4, 137.6, 135.4, 135.1, 132.9, 132.8, 131.5, 131.3, 131.3, 130.4, 130.3, 130.0, 129.7, 129.4, 128.9, 128.0, 127.7, 127.3, 126.9, 126.4, 126.2, 126.1, 125.8, 124.9, 123.5, 123.4, 123.1, 122.8, 122.5, 122.4, 121.8, 119.2, 111.1, 28.6, 28.5, 28.4, 28.0, 15.5, 15.31, 15.28, 14.5. HRMS Calculated for  $\text{C}_{62}\text{H}_{53}\text{N}_4^+$ , 853.4270, found 853.4265.

**N-(3,4-bis(4-(tert-butyl)phenyl)isoquinolin-1-yl)-5,6-bis(4-(tert-butyl)phenyl)-N-phenylbenzo[4,5]imidazo[2,1-a]isoquinolin-9-amine (3ag).** Yellow solid (isolated yield

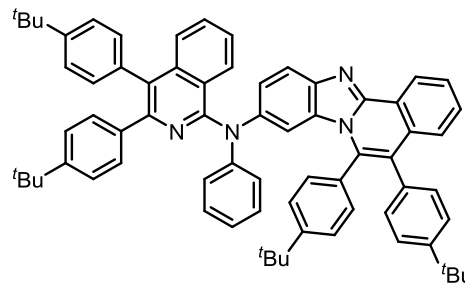

59%). mp 198.4-199.7 °C. Petroleum ether/ethyl acetate = 4:1.  $^1\text{H}$  NMR (400 MHz,  $\text{CDCl}_3$ )  $\delta$  = 8.98 (d,  $J=7.8$  Hz, 1H), 7.87 (d,  $J=8.7$  Hz, 1H), 7.75 – 7.64 (m, 2H), 7.63 – 7.52 (m, 2H), 7.45 (d,  $J=7.9$  Hz, 1H), 7.39 (dd,  $J=10.4$  Hz, 4.8 Hz, 3H), 7.19 (dd,  $J=8.1$  Hz, 4.0 Hz, 5H), 7.17 – 7.08 (m, 5H), 7.06 – 6.99 (m, 6H), 6.99 – 6.91 (m, 3H), 6.90 – 6.85 (m, 2H), 6.45 (d,  $J=1.9$  Hz, 1H), 1.38 (s, 9H), 1.24 (s, 9H), 1.17 (s, 9H), 0.95 (s, 9H).  $^{13}\text{C}$  NMR (101 MHz,  $\text{CDCl}_3$ )  $\delta$  = 156.4, 154.7, 151.8, 150.1, 149.7, 149.6, 148.8, 148.3, 148.0, 142.3, 141.1, 139.4, 137.3, 135.5, 134.9, 132.7, 132.6, 131.6, 131.1, 131.0, 130.2, 129.9, 129.9, 129.6, 129.4, 128.8, 127.54, 127.52, 126.5, 126.3, 126.1, 125.8, 125.2, 124.9, 124.8, 124.5, 124.2, 123.8, 123.7, 123.0, 122.6, 122.1, 119.3, 111.7, 34.6, 34.4, 34.31, 34.29, 31.4, 31.23, 31.19, 30.9. HRMS Calculated for  $\text{C}_{70}\text{H}_{69}\text{N}_4^+$ , 965.5522, found 965.5517.

**N-(3,4-bis(4-methoxyphenyl)isoquinolin-1-yl)-5,6-bis(4-methoxyphenyl)-N-phenylbenzo[4,5]imidazo[2,1-a]isoquinolin-9-amine (3ah).** Yellow solid (isolated yield

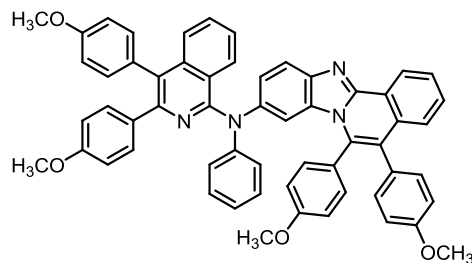

34%). mp 146.4-147.9 °C. Petroleum ether/ethyl acetate = 4:1.  $^1\text{H}$  NMR (400 MHz,  $\text{CDCl}_3$ )  $\delta$  = 8.99 (d,  $J=7.9$  Hz, 1H), 7.91 (d,  $J=8.8$  Hz, 1H), 7.65 (ddd,  $J=16.3$  Hz, 11.2 Hz, 5.9 Hz, 3H), 7.58 – 7.50 (m, 1H), 7.41 (ddd,  $J=8.4$  Hz, 6.8 Hz, 1.2 Hz, 1H), 7.35 – 7.24 (m, 4H), 7.24 – 7.13 (m, 3H), 7.11 – 7.05 (m, 2H), 7.05 – 6.92 (m, 9H), 6.80 – 6.72 (m, 2H), 6.63 – 6.54 (m, 2H), 6.41 – 6.33 (m, 2H), 5.93 (d,  $J=1.9$  Hz, 1H), 3.87 (s, 3H), 3.76 (s, 3H), 3.68 (s, 3H), 3.40 (s, 3H).  $^{13}\text{C}$  NMR (101 MHz,  $\text{CDCl}_3$ )  $\delta$  = 159.4, 158.8, 158.6, 158.5, 156.4, 151.0, 148.4, 148.0, 147.40, 147.39, 143.0, 139.8, 135.2, 132.94, 132.92, 132.5, 132.4, 131.6, 131.5, 131.2, 130.3, 129.8, 129.4, 128.9, 127.9, 127.8, 126.8, 126.4, 126.2, 125.6, 125.3, 124.9, 124.0, 123.7, 122.8, 122.7, 122.3, 119.2, 114.1, 113.7, 113.4, 112.9, 112.4, 110.3, 55.3, 55.1, 55.1, 54.9. HRMS Calculated for  $\text{C}_{58}\text{H}_{45}\text{N}_4\text{O}_4^+$ , 861.3441, found 861.3436.

**N-(3,4-bis(3-fluorophenyl)isoquinolin-1-yl)-5,6-bis(3-fluorophenyl)-N-phenylbenzo[4,5]imidazo[2,1-a]isoquinolin-9-amine (3ai).** Yellow solid (isolated yield 60%). mp 102.8-104.6 °C. Petroleum ether/ethyl acetate = 4:1.  $^1\text{H}$  NMR (400 MHz,  $\text{CDCl}_3$ )  $\delta$  = 8.97 (d,  $J=7.9$  Hz, 1H), 7.94 (d,  $J=8.8$  Hz, 1H), 7.79 – 7.67 (m, 2H), 7.64 – 7.54 (m, 2H),

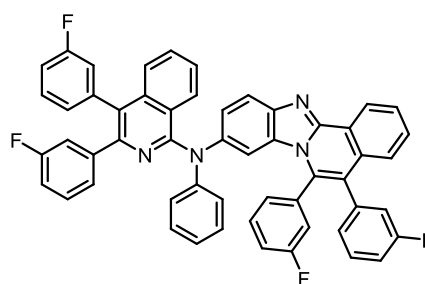

7.54 – 7.47 (m, 1H), 7.45 – 7.34 (m, 2H), 7.32 – 7.15 (m, 7H), 7.15 – 6.72 (m, 16H), 6.48 – 6.36 (m, 1H), 5.62 (d,  $J=2.0$  Hz, 1H).  $^{13}\text{C}$  NMR (101 MHz,  $\text{CDCl}_3$ )  $\delta$  = 162.34 (d,  $J$  = 247.2 Hz), 162.18 (d,  $J$  = 244.5 Hz), 162.04 (d,  $J$  = 249.7 Hz), 162.00 (d,  $J$  = 249.1 Hz), 161.67 (d,  $J$  = 7.3 Hz), 157.1, 148.0, 147.3, 143.1, 142.14 (dd,  $J$  = 7.7, 1.5 Hz), 140.35 (d,  $J$  = 3.4 Hz), 139.64 (d,  $J$  = 7.9 Hz), 138.8, 137.36 (d,  $J$  = 8.0 Hz), 134.66 (d,  $J$  = 1.5 Hz), 134.6, 133.5, 131.7, 131.3, 130.3, 130.12 (d,  $J$  = 24.5 Hz), 130.2, 130.1, 129.78 (d,  $J$  = 5.4 Hz), 129.70 (d,  $J$  = 5.5 Hz), 129.2, 128.98 (d,  $J$  = 8.3 Hz), 128.3, 127.18, 127.16, 127.0, 126.8, 126.3, 126.1, 125.92 (d,  $J$  = 7.1 Hz), 125.0, 123.80, 123.75, 123.2, 123.0, 122.5, 119.8, 118.4, 118.2, 117.24 (d,  $J$  = 3.4 Hz), 117.07 (d,  $J$  = 22.8 Hz), 117.02 (d,  $J$  = 3.5 Hz), 116.1, 115.8, 115.64 (d,  $J$  = 1.5 Hz), 114.63 (d,  $J$  = 20.8 Hz), 114.18 (d,  $J$  = 21.3 Hz).  $^{19}\text{F}$  NMR (376 MHz,  $\text{CDCl}_3$ )  $\delta$  -110.11 (d,  $J$  = 120.6 Hz), -112.51 (dd,  $J$  = 46.8, 7.2 Hz), -112.87 (d,  $J$  = 88.3 Hz), -113.92 (d,  $J$  = 4.2 Hz). HRMS Calculated for  $\text{C}_{54}\text{H}_{33}\text{F}_4\text{N}_4^+$ , 813.2641, found 813.2638.

**N-(3,4-bis(3-chlorophenyl)isoquinolin-1-yl)-5,6-bis(3-chlorophenyl)-N-phenylbenzo[4,5]imidazo[2,1-a]isoquinolin-9-amine (3aj).**

Yellow solid (isolated yield 64%). mp 129.4-130.6 °C. Petroleum ether/ethyl acetate = 4:1.  $^1\text{H}$  NMR (400 MHz,  $\text{CDCl}_3$ )  $\delta$  = 8.94 (d,  $J=7.6$  Hz, 1H), 7.92 (d,  $J=8.8$  Hz, 1H), 7.80 (d,  $J=8.5$  Hz, 1H), 7.69 (t,  $J=7.2$  Hz, 1H), 7.63 – 7.47 (m, 3H), 7.37 (ddd,  $J=15.9$  Hz, 8.3 Hz, 1.7

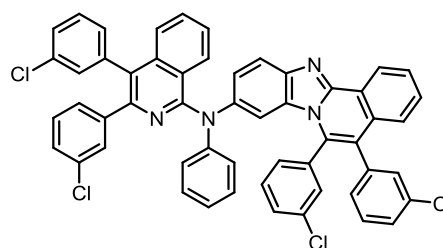

Hz, 4H), 7.32 – 7.27 (m, 1H), 7.24 – 7.05 (m, 11H), 7.04 – 6.90 (m, 6H), 6.75 (dd,  $J=8.5$  Hz, 5.4 Hz, 2H), 5.71 (d,  $J=1.8$  Hz, 1H).  $^{13}\text{C}$  NMR (101 MHz,  $\text{CDCl}_3$ )  $\delta$  = 157.2, 148.1, 147.6, 147.3, 143.0, 141.6, 140.8, 139.3, 138.8, 137.1, 134.6, 134.5, 134.3, 134.1, 134.0, 133.6, 133.5, 131.6, 131.4, 131.3, 131.2, 130.5, 130.3, 130.0, 129.9, 129.7, 129.6, 129.53, 129.50, 129.45, 129.2, 128.9, 128.8, 128.3, 128.3, 128.1, 127.9, 127.4, 126.9, 126.8, 126.3, 126.2, 125.9, 124.9, 124.0, 123.3, 123.3, 123.1, 122.5, 122.4, 119.9, 109.3. HRMS Calculated for  $\text{C}_{54}\text{H}_{33}\text{Cl}_4\text{N}_4^+$ , 877.1459, found 877.1458.

**N-(3,4-di-m-tolylisoquinolin-1-yl)-N-phenyl-5,6-di-m-tolylbenzo[4,5]imidazo[2,1-a]isoquinolin-9-amine (3ak).**

Yellow solid (isolated yield 66%). mp 99.8-100.7 °C.

Petroleum ether/ethyl acetate = 4:1.  $^1\text{H}$  NMR (400 MHz,  $\text{CDCl}_3$ )  $\delta$  = 8.97 (d,  $J=7.9$  Hz, 1H), 7.92 (d,  $J=8.8$  Hz, 1H), 7.74 (d,  $J=8.5$  Hz, 1H), 7.70 – 7.63 (m, 2H), 7.54 (t,  $J=7.8$  Hz, 1H), 7.47 (t,  $J=7.6$  Hz, 1H), 7.39 (d,  $J=8.8$  Hz, 1H), 7.36 – 7.16 (m, 7H), 7.15 – 6.83 (m, 13H), 6.79 (d,

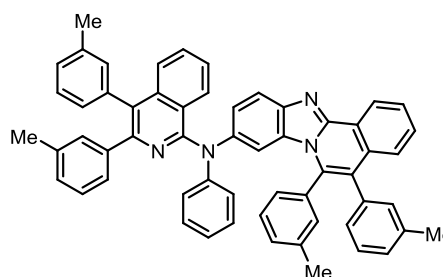

$J=7.6$  Hz, 1H), 6.62 (t,  $J=7.6$  Hz, 1H), 6.52 – 6.40 (m, 1H), 5.58 (dd,  $J=8.7$  Hz, 2.7 Hz, 1H), 2.43 – 2.29 (m, 3H), 2.23 (d,  $J=18.8$  Hz, 3H), 2.09 (s, 3H), 1.88 (d,  $J=3.6$  Hz, 3H).  $^{13}\text{C}$  NMR (101 MHz,  $\text{CDCl}_3$ )  $\delta$  = 156.6, 148.7, 148.4, 147.4, 142.8, 140.1, 139.3, 138.1, 138.01, 137.96, 137.9, 137.8, 137.5, 137.3, 136.8, 135.5, 135.1, 133.3, 132.9, 132.6, 132.6, 132.2, 132.0, 131.9, 131.6, 131.3, 130.7, 129.7, 129.6, 129.1, 128.9, 128.54, 128.47, 128.4, 128.3, 128.2, 128.0, 127.96, 127.9, 127.8, 127.7, 127.68, 127.6, 127.4, 127.2, 126.8, 126.4, 126.3, 126.1, 124.9, 123.5, 123.1, 122.5, 122.3, 119.3, 110.1, 21.52 (d,  $J$  = 6.6 Hz), 21.4, 21.34 (d,  $J$  = 2.0 Hz), 21.2. HRMS Calculated for  $\text{C}_{58}\text{H}_{45}\text{N}_4^+$ , 797.3644, found 797.3639.

**6-methyl-N-(3-methyl-4-phenylisoquinolin-1-yl)-N,5-diphenylbenzo[4,5]imidazo[2,1-a]isoquinolin-9-amine (3ap).** Yellow solid (isolated yield 21%), Petroleum

ether/ethyl acetate = 4:1.  $^1\text{H}$  NMR (400 MHz,  $\text{CDCl}_3$ )  $\delta$  = 8.96 (s, 1H), 8.11 (d,  $J$ =8.5, 1H), 7.85 (dd,  $J$ =9.1, 3.5, 2H), 7.69 (ddd,  $J$ =10.2, 9.7, 4.8, 4H), 7.49 – 7.44 (m, 2H), 7.41 – 7.26 (m, 6H), 7.20 – 7.13 (m, 2H), 7.09 –

7.03 (m, 2H), 6.92 (ddd,  $J$ =21.5, 16.1, 7.5, 5H), 6.79 (t,  $J$ =7.5, 1H), 2.79 (s, 3H), 2.19 (s, 3H).

$^{13}\text{C}$  NMR (101 MHz,  $\text{CDCl}_3$ )  $\delta$  = 155.5, 150.4, 148.2, 142.9, 140.8, 139.4, 134.5, 134.1, 133.7, 132.1, 131.3, 131.1, 130.2, 129.8, 129.4, 128.9, 128.7, 128.6, 127.9, 127.8, 127.8, 127.5, 127.0, 126.8, 126.2, 125.29, 125.28, 124.1, 124.0, 123.6, 123.2, 122.4, 121.6, 121.3, 119.1, 108.9, 29.7, 22.7.

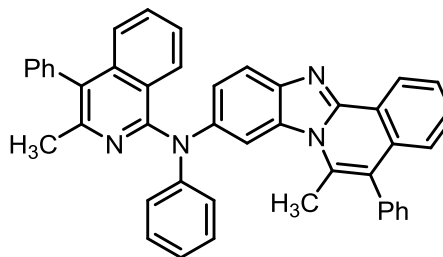

## 5. Procedures of mechanistic studies

### 5.1 Synthesis of Rh(III) complex I

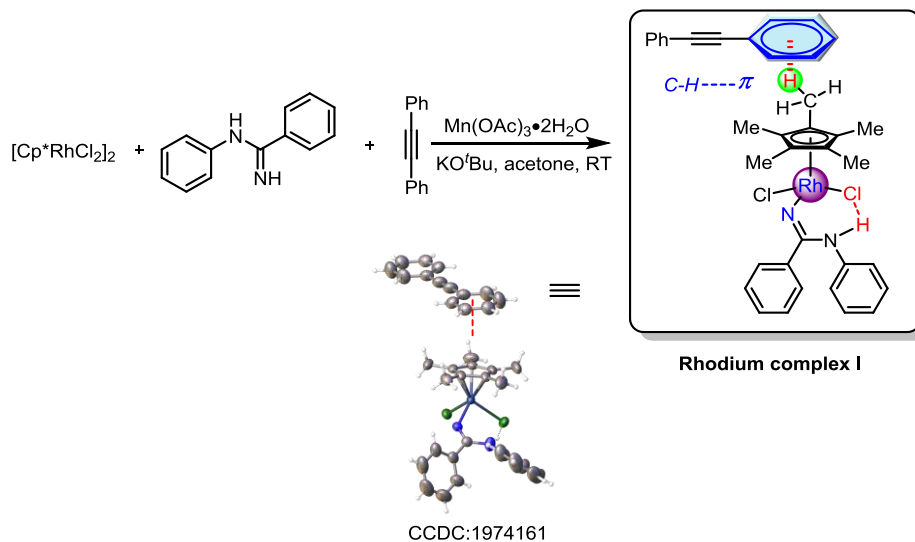

N-phenylbenzimidamide **1a** (2.5 mg, 0.0125 mmol),  $[\text{RhCp}^*\text{Cl}_2]_2$  (7.7 mg, 0.0125 mmol), 1,2-diphenylethyne **2a** (2.2 mg, 0.0125 mmol),  $\text{Mn}(\text{OAc})_3 \cdot 2\text{H}_2\text{O}$  (3.4 mg, 0.125 mmol),  $\text{KO}^t\text{Bu}$  (1.4 mg, 0.0125 mmol), and acetone (2 mL) were charged into an oven dried reaction tube and then stirred for 5 min at room temperature under air atmosphere. The reaction mixture was recrystallized with n-petane to afford the intermediate **Rhodium complex I**, which was further confirmed by single-crystal X-ray crystallography.

### 5.2 Synthesis of Rhodacycle Intermediate II

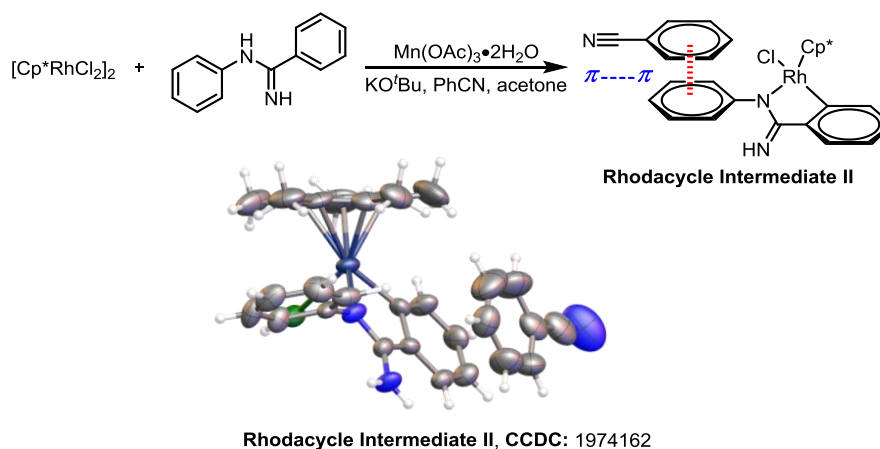

N-phenylbenzimidamide **1a** (2.5 mg, 0.0125 mmol),  $[\text{RhCp}^*\text{Cl}_2]_2$  (7.7 mg, 0.0125 mmol),  $\text{Mn}(\text{OAc})_3 \cdot 2\text{H}_2\text{O}$  (3.4 mg, 0.125 mmol) and  $\text{KO}^t\text{Bu}$  (1.4 mg, 0.0125 mmol), PhCN (2.6  $\mu\text{L}$ , 0.025

mmol), and acetone (2 mL) were charged into an oven dried reaction tube and then stirred for 5 min at room temperature under air atmosphere. The reaction mixture was recrystallized with *n*-petane to afford the intermediate **Rhodacycle Intermediate II**, which was further confirmed by single-crystal X-ray crystallography.

### 5.3 H/D exchange experiment

Under an atmospheric condition, amidine **1a** (24.5 mmol, 0.125 mmol), Mn(OAc)<sub>3</sub> 2H<sub>2</sub>O (6 equiv, 201.1 mg), KO<sup>t</sup>Bu (20%), PhCN (20%, 25.6 uL), D<sub>2</sub>O (5 equiv) and DCE (4 mL) were charged into a 25 mL vial equipped with a stir bar. The reaction mixture was stirred at 40 °C for 48 h. Solvent was removed under reduced pressure to leave a crude mixture, and the H/D exchange product was isolated.

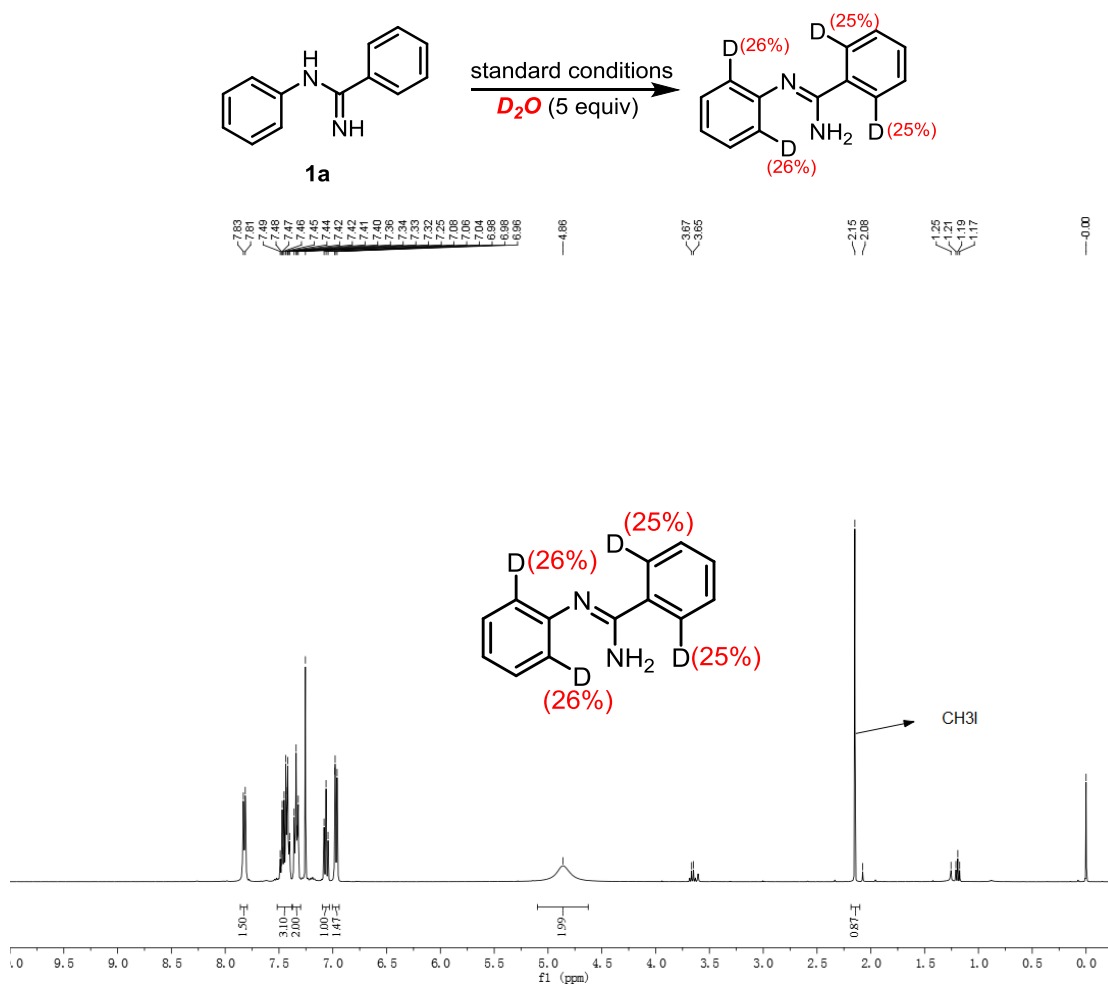

Under an atmospheric condition, amidine **1a** (24.5 mmol, 0.125 mmol), 1,2-diphenylethyne **2a** (0.375mmol, 66.8 mg), Mn(OAc)<sub>3</sub> 2H<sub>2</sub>O (6 equiv, 201.1 mg), KO<sup>t</sup>Bu (20%), PhCN (20%, 25.6 uL), D<sub>2</sub>O (5 equiv) and DCE (4 mL) were charged into a 25 mL vial. The reaction mixture was



stirred at 40 °C for 48 h. Solvent was removed under reduced pressure to leave a crude mixture, and the **H/D exchange** product was isolated.

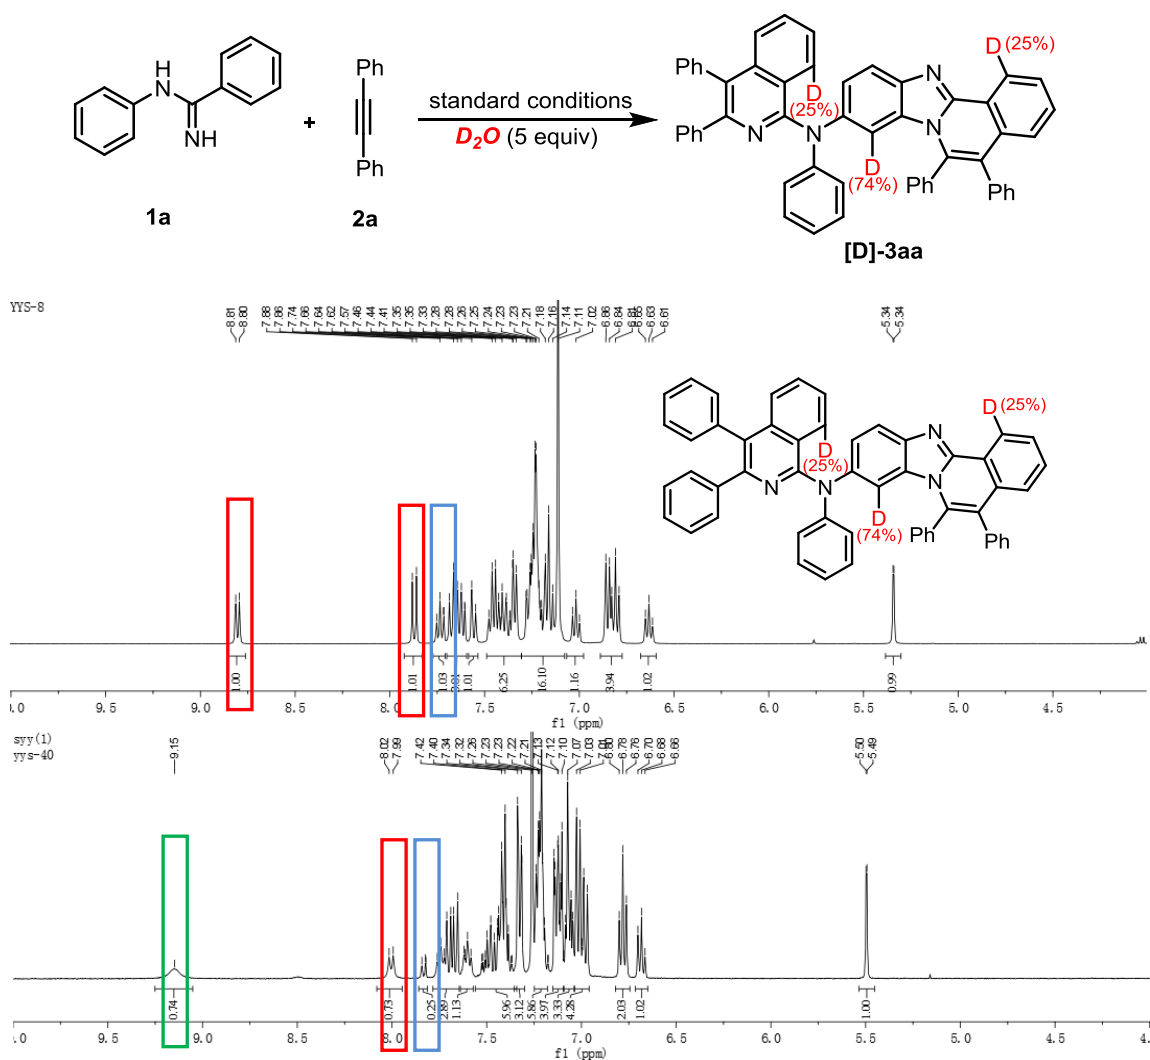

Under an atmospheric condition,  $[D_5]$ -**1a** (24.5 mg, 0.125 mmol), 1,2-diphenylethyne **2a** (0.375mmol, 66.8 mg),  $Mn(OAc)_3 \cdot 2H_2O$  (6 equiv, 201.1 mg),  $KO^tBu$  (20%), PhCN (20%, 25.6  $\mu L$ ),  $H_2O$  (5 equiv) and DCE (4 mL) were charged into a 25 mL vial. The reaction mixture was stirred at 40 °C for 48 h. Solvent was removed under reduced pressure to leave a crude mixture, and the H/D exchange product was isolated in 63% yield. The corresponding product was determined by  $^1H$  NMR using  $CH_3I$  (5.0  $\mu L$ ) as the internal standard.

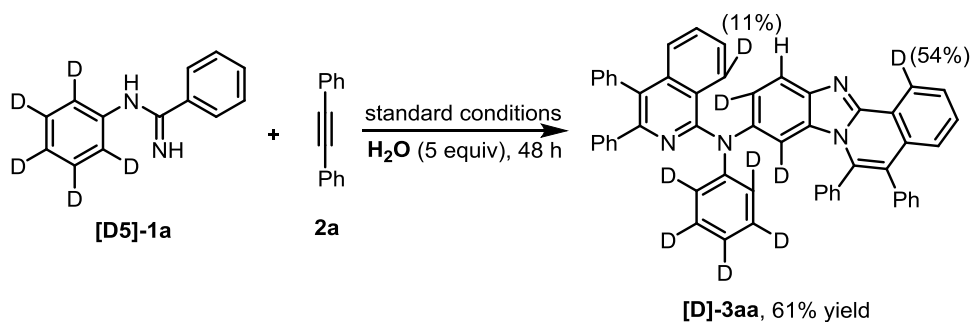

Under an atmospheric condition, **[D<sub>5</sub>]-1a** (25.2 mg, 0.125 mmol), 1,2-diphenylethyne **2a** (0.375mmol, 66.8 mg), Mn(OAc)<sub>3</sub> 2H<sub>2</sub>O (6 equiv, 201.1 mg), KO<sup>t</sup>Bu (20%), PhCN (20%, 25.6 uL), and DCE (4 mL) were charged into a 25 mL vial equipped with a stir bar. The reaction mixture was stirred at 40 °C for 48 h, then the mixture was cooled and filtered through a short column of silica gel (eluent PE). Solvent was removed under reduced pressure to leave a crude mixture, and the H/D exchange product was isolated.

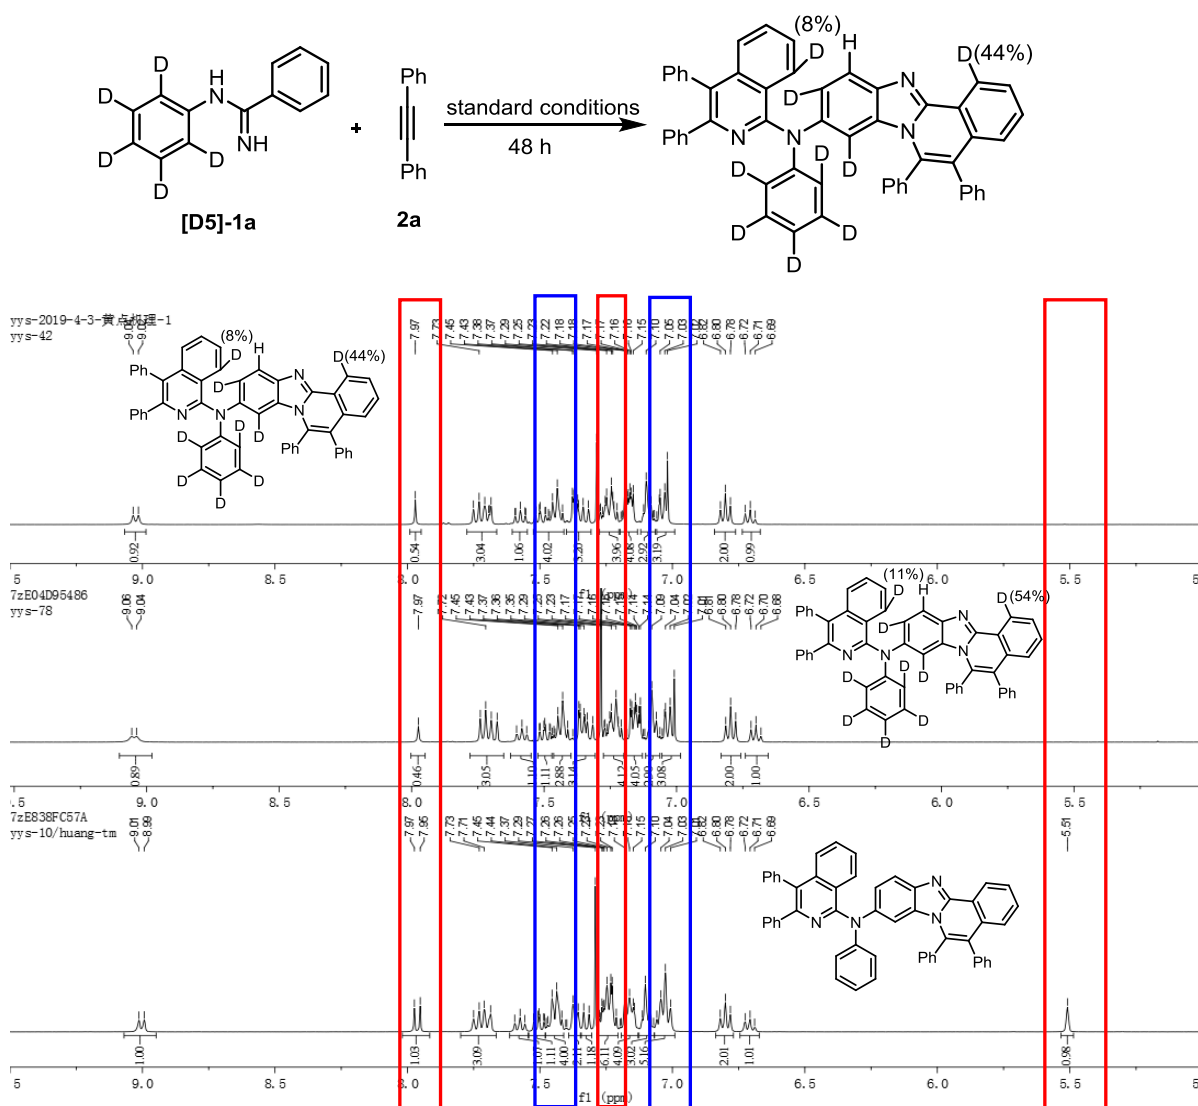



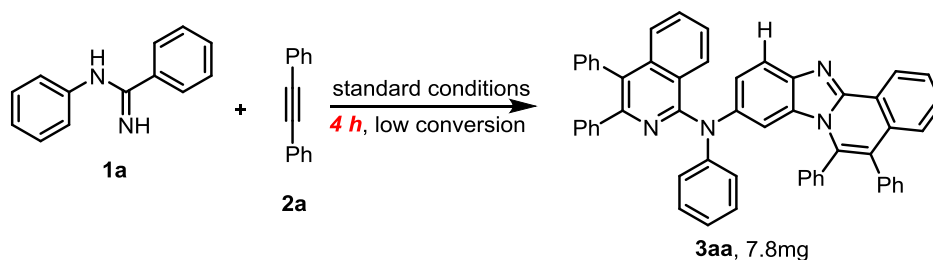

Under an atmospheric condition, [D<sub>5</sub>]-**1a** (25.2 mg, 0.125 mmol), 1,2-diphenylethyne **2a** (0.375 mmol, 66.8 mg), Mn(OAc)<sub>3</sub> · 2H<sub>2</sub>O (6 equiv, 201.1 mg), KO<sup>t</sup>Bu (20%), PhCN (20%, 25.6 uL), and DCE (4 mL) were charged into a 25 mL vial equipped with a stir bar. The reaction mixture was stirred at 40 °C for 4 h, then the mixture was cooled and filtered through a short column of silica gel (eluent PE). Solvent was removed under reduced pressure to leave a crude mixture, and the product **3aa** was isolated (1.8 mg, <10% yield).

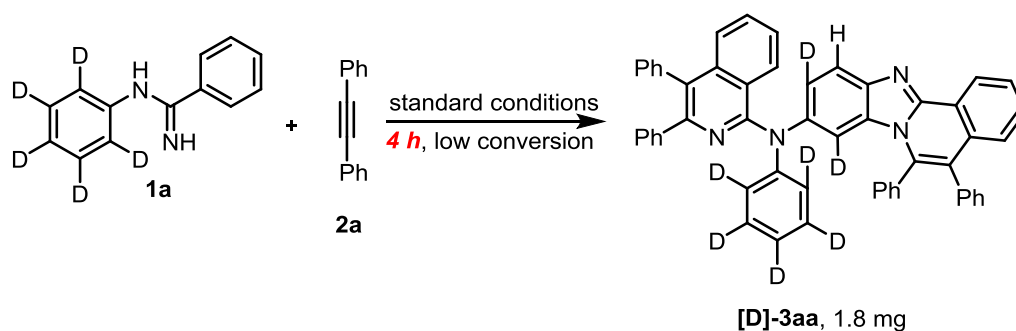

These two reactions were conducted at the same time in the same bath oil. Parallel competition: KIE = **3aa**:**[D<sub>5</sub>]-3aa** = 7.8mg/1.8mg = 4.3.

### 5.4.2 In one-pot reactions

Without any particular precautions to extrude oxygen or moisture, a mixture of **1a** and [D<sub>5</sub>]-**1a** (1:1 ratio, 0.25 mmol in total), 1,2-diphenylethyne **2a** (0.375 mmol, 66.8 mg), Mn(OAc)<sub>3</sub> · 2H<sub>2</sub>O (6 equiv, 201.1 mg), KO<sup>t</sup>Bu (20%), PhCN (20%, 25.6 uL), and DCE (4 mL) were charged into a 25 mL vial. The reaction mixture was stirred at 40 °C for 4 h, then the reaction mixture was filtered through a short column of silica gel (eluent PE). Solvent was removed under reduced pressure to leave a crude mixture, and an inseparable mixture was obtained.

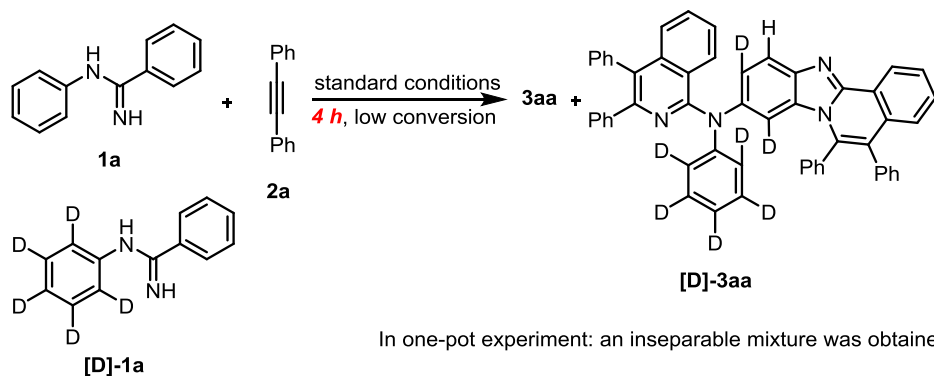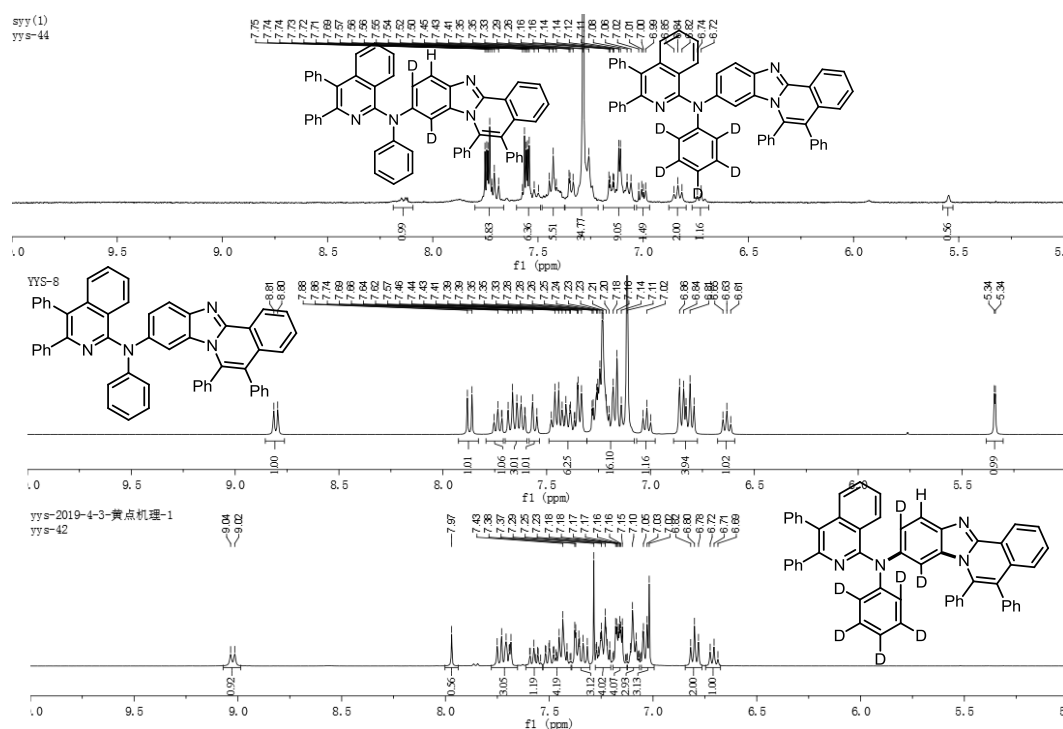

## 5.5 Intermolecular Competitive Reaction

A mixture of **1e** and **1d** (1:1 ratio, 0.25 mmol in total), 1,2-diphenylethyne **2a** (0.375 mmol, 66.8 mg),  $\text{Mn}(\text{OAc})_3 \cdot 2\text{H}_2\text{O}$  (6 equiv, 201.1 mg),  $\text{KO}^t\text{Bu}$  (20%), PhCN (20%, 25.6  $\mu\text{L}$ ), and DCE (4 mL) were charged into a 25 mL vial. The reaction mixture was stirred at 40  $^\circ\text{C}$  for 4 h, then the reaction mixture was filtered through a short column of silica gel (eluent PE). Solvent was removed under reduced pressure to leave a crude mixture, an inseparable mixture and a cross-coupling product **3oa** was obtained. The structure of **3oa** was further determined by X-ray crystallographic analysis. Then, subjecting N,3,4-triphenylisoquinolin-1-amine **5** and 5,6-diphenylbenzo[4,5]-imidazo[2,1-a]isoquinoline **6** to the reaction conditions, **6** was recovered in quant, suggesting that the intermolecular meta C-H amination might not occur at the last stage of the transformation.

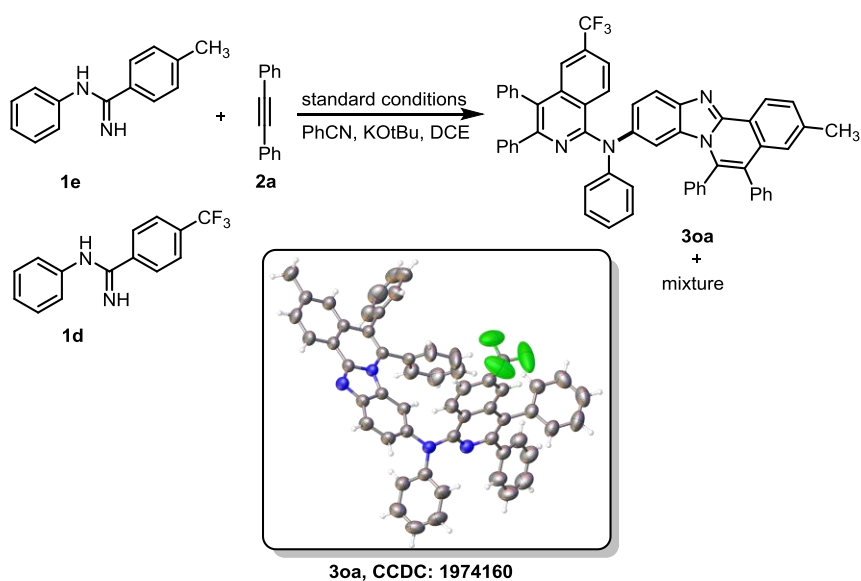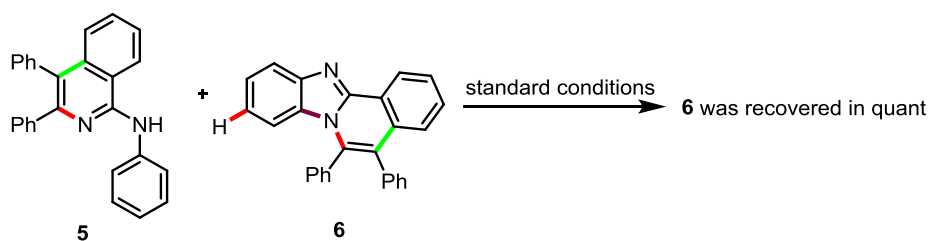

## 5.6 Radical Trapping experiments.

A mixture of **1a** (1:1 ratio, 0.25 mmol), 1,2-diphenylethyne **2a** (0.375 mmol, 66.8 mg),  $\text{Mn}(\text{OAc})_3 \cdot 2\text{H}_2\text{O}$  (6 equiv, 201.1 mg), KOtBu (20%), PhCN (20%, 25.6  $\mu\text{L}$ ), TEMPO (1 equiv) and DCE (4 mL) were charged into a 25 mL vial. The reaction mixture was stirred at 40 °C for 48 h, the reaction mixture was filtered through a short column of silica gel (eluent PE). Solvent was removed under reduced pressure to leave a crude mixture, and the expected product was obtained in 20% yield.

## 5.7 Control experiment

**5** and **6** were subjected to the reaction conditions for 48 h. After cooling the reaction to room temperature, the solvent was removed under vacuum and **6** was recovered in quant.

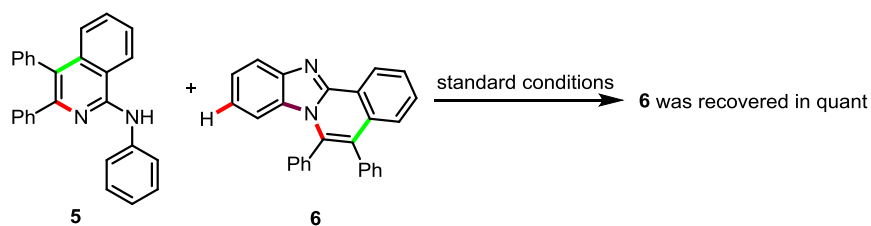

## 5.8 In-situ HRMS

Under an atmospheric condition, **1a** (25.2 mg, 0.125 mmol), 1,2-diphenylethyne **2a** (0.375 mmol, 66.8 mg), Mn(OAc)<sub>3</sub>·2H<sub>2</sub>O (6 equiv, 201.1 mg), KO<sup>t</sup>Bu (20%), PhCN (20%, 25.6 uL), and DCE (4 mL) were charged into a 25 mL vial equipped with a stir bar. The reaction mixture was stirred at 40 °C for 4 h, then the mixture was cooled and the sample (YY5-1) was detected on UPLC-Exactive/UPLC-Exactive.

Under an atmospheric condition, **1a** (25.2 mg, 0.125 mmol), 1,2-diphenylethyne **2a** (0.375 mmol, 66.8 mg), Mn(OAc)<sub>3</sub>·2H<sub>2</sub>O (6 equiv, 201.1 mg), KO<sup>t</sup>Bu (20%), PhCN (20%, 25.6 uL), and DCE (4 mL) were charged into a 25 mL vial equipped with a stir bar. The reaction mixture was stirred at 40 °C for 8 h, then the mixture was cooled and the sample (YY5-2) was detected on UPLC-Exactive/UPLC-Exactive.

Under an atmospheric condition, **1a** (25.2 mg, 0.125 mmol), 1,2-diphenylethyne **2a** (0.375 mmol, 66.8 mg), Mn(OAc)<sub>3</sub>·2H<sub>2</sub>O (6 equiv, 201.1 mg), KO<sup>t</sup>Bu (20%), PhCN (20%, 25.6 uL), and DCE (4 mL) were charged into a 25 mL vial equipped with a stir bar. The reaction mixture was stirred at 40 °C for 24 h, then the mixture was cooled and the sample (YY5-3) was detected on UPLC-Exactive/UPLC-Exactive.

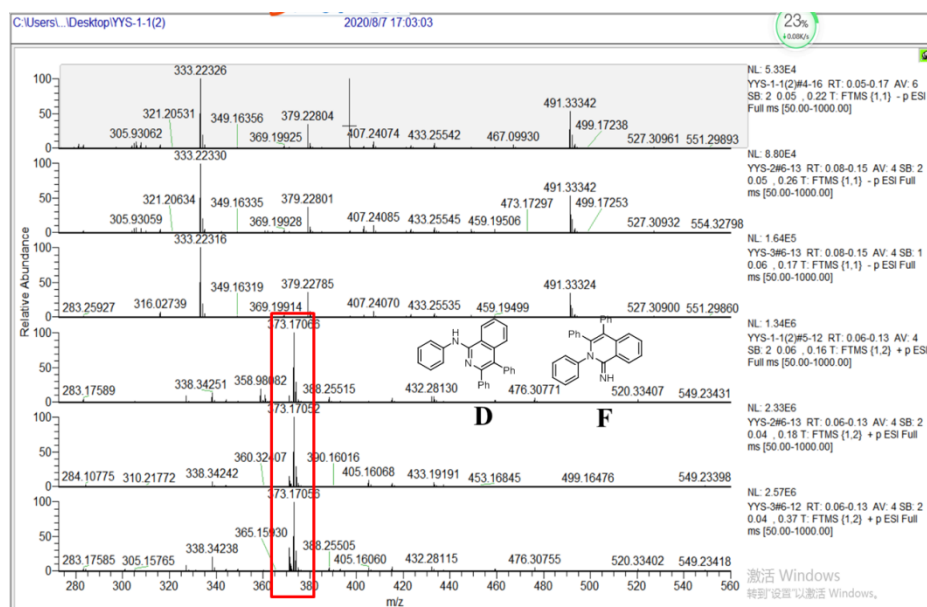

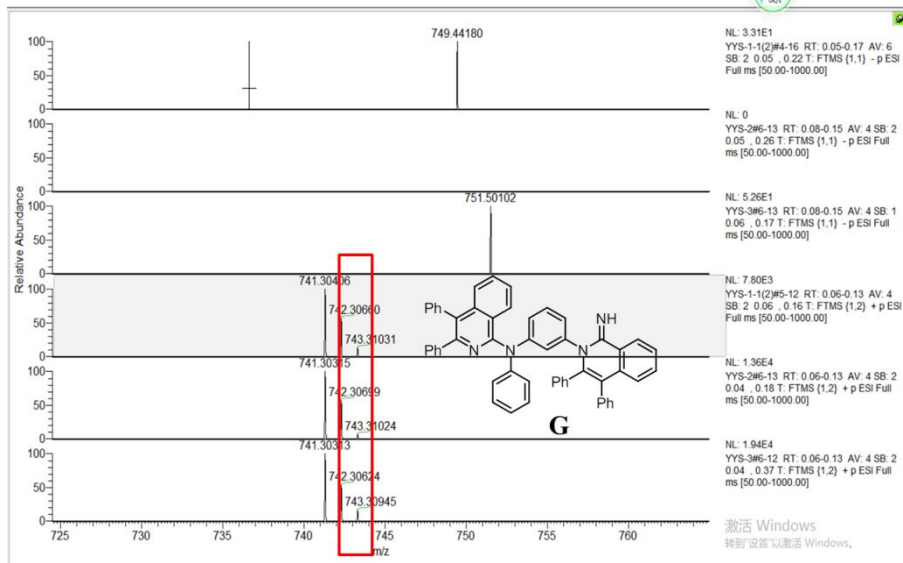

NL: 3.31E1  
YYS-1-1(2)#4-16 RT: 0.05-0.17 AV: 6  
SB: 2 0.05, 0.22 T: FTMS (1,1) - p ESI Full  
ms [50.00-1000.00]

NL: 0  
YYS-2#6-13 RT: 0.08-0.15 AV: 4 SB: 2  
0.05, 0.26 T: FTMS (1,1) - p ESI Full  
ms [50.00-1000.00]

NL: 5.26E1  
YYS-3#6-13 RT: 0.08-0.15 AV: 4 SB: 1  
0.06, 0.17 T: FTMS (1,1) - p ESI Full  
ms [50.00-1000.00]

NL: 7.80E3  
YYS-1-1(2)#5-12 RT: 0.06-0.13 AV: 4  
SB: 2 0.06, 0.16 T: FTMS (1,2) + p ESI  
Full ms [50.00-1000.00]

NL: 1.36E4  
YYS-2#6-13 RT: 0.06-0.13 AV: 4 SB: 2  
0.04, 0.18 T: FTMS (1,2) + p ESI Full  
ms [50.00-1000.00]

NL: 1.94E4  
YYS-3#6-12 RT: 0.06-0.13 AV: 4 SB: 2  
0.04, 0.37 T: FTMS (1,2) + p ESI Full  
ms [50.00-1000.00]

激活 Windows  
转到 设置 以激活 Windows。



## 6. References

- (S1) Li, D.; Zeng, F. *Org. Lett.* **2017**, *19*, 6498–6501.
- (S2) Martínez, A. M.; Echavarren, J.; Alonso, I.; Rodríguez, N.; Arrayá R. G.; Carretero, J. C. *Chem. Sci.* **2015**, *6*, 5802–5814.
- (S3) Mori, A.; Kawashima, J.; Shimada, T.; Suguro, M.; Hirabayashi, K.; Nishihara, Y. *Org. Lett.* **2000**, *2*, 2935–2937.
- (S4) Das, S. K.; Sarmah, M.; Bora, U. *Tetrahedron Lett.* **2017**, *58*, 2094–2097.
- (S5) Yamamoto, Y.; Kinpara, K.; Ogawa, R.; Nishiyama, H.; Itoh, K. *Chem. – Eur. J.* **2006**, *12*, 5618–5631.
- (S6) Brasche, G.; Buchwald, S. L. *Angew. Chem., Int. Ed.* **2008**, *47*, 1932–1934.
- (S7) Sheldrick, G. M. *SHELXTL-97, Program for X-ray Crystal Structure Solution*; University of Göttingen: Göttingen, Germany, **1997**.

## 7. Single-Crystal X-Ray Crystallography

### 7.1 Crystal structures of targeted quinazolines (5 products). The displacement ellipsoids are drawn at the 30% probability.

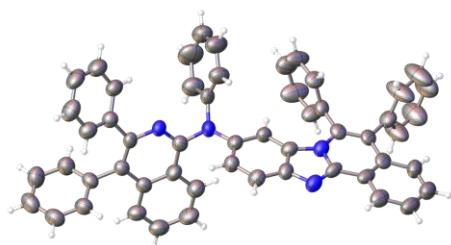

3aa, CCDC:1974156

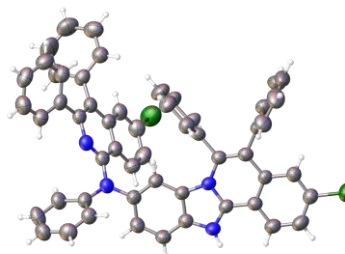

3ca, CCDC:1974157

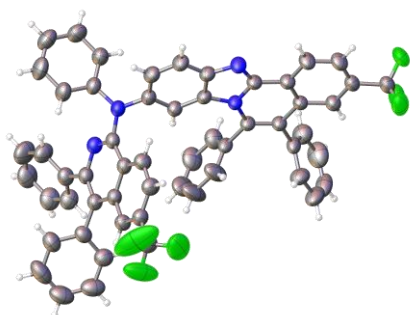

3da, CCDC:1974158

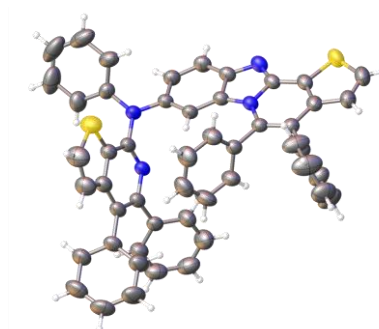

3na, CCDC:1974159

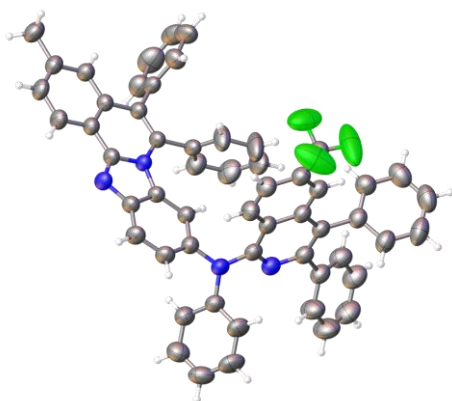

3oa, CCDC:1974160

### 7.2 Crystal structures of intermediate Rhodium-complex I (C: black; H: gray; Cl: green; N: light blue; Rh: navy blue). The displacement ellipsoids are drawn at the 30% probability.

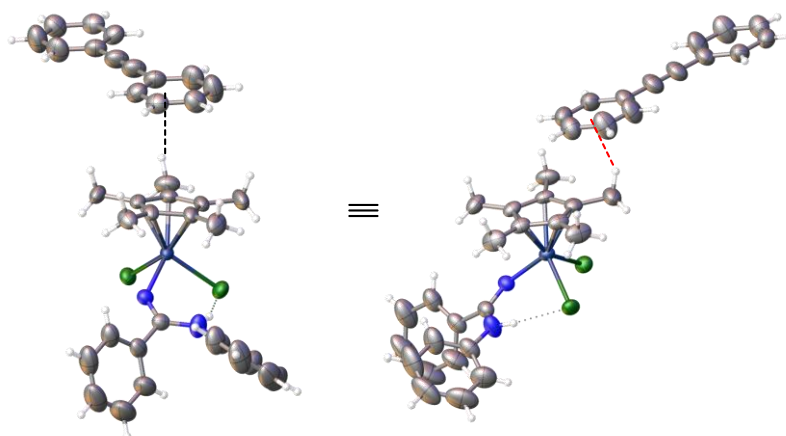

Rhodium-complex I, CCDC:1974161

**7.3 Crystal structures of intermediate Rhodacycle intermediate II (C: black; H: gray; Cl: green; N: light blue; Rh: navy blue). The displacement ellipsoids are drawn at the 30% probability.**

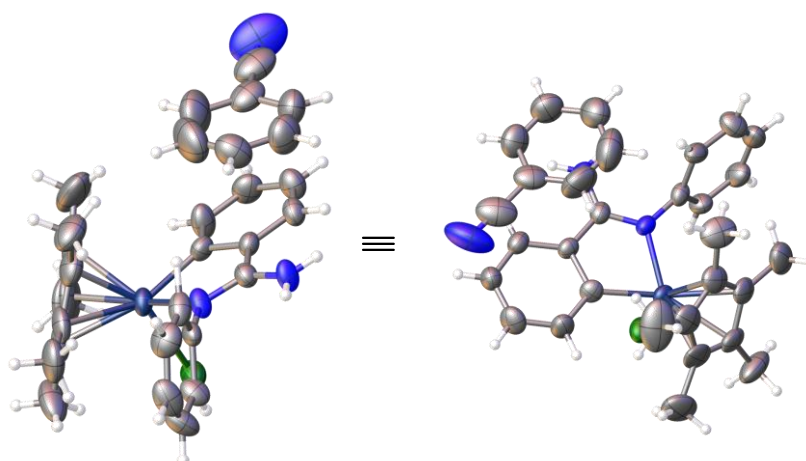

Rhodacycle intermediate II, CCDC:1974162

**Table S2.** Crystal data and structure refinement details for targeted products, Rh(III) Complex I, and Rh(III) Complex II.

|                                                                                                                     | <b>3aa</b>                         | <b>3ca</b>                                                          | <b>3da</b>                                                               | <b>3na</b>                                                               | <b>3oa</b>                                                                                                    |
|---------------------------------------------------------------------------------------------------------------------|------------------------------------|---------------------------------------------------------------------|--------------------------------------------------------------------------|--------------------------------------------------------------------------|---------------------------------------------------------------------------------------------------------------|
| Empirical formula                                                                                                   | C <sub>11</sub> H <sub>10</sub> NO | C <sub>10.8</sub> H <sub>7</sub> N <sub>0.8</sub> Cl <sub>0.4</sub> | C <sub>10.67</sub> H <sub>6.48</sub> N <sub>0.76</sub> F <sub>1.14</sub> | C <sub>11.11</sub> H <sub>7.11</sub> N <sub>0.89</sub> S <sub>0.44</sub> | C <sub>10.67</sub> H <sub>7.05</sub> N <sub>0.76</sub> F <sub>0.57</sub> Cl <sub>0.05</sub> O <sub>0.05</sub> |
| Formula weight                                                                                                      | 155.98                             | 162.15                                                              | 167.02                                                                   | 167.31                                                                   | 159.19                                                                                                        |
| Crystal system                                                                                                      | monoclinic                         | monoclinic                                                          | monoclinic                                                               | triclinic                                                                | monoclinic                                                                                                    |
| Space group                                                                                                         | P2 <sub>1</sub> /c                 | P2 <sub>1</sub>                                                     | P2 <sub>1</sub> /n                                                       | P-1                                                                      | P2 <sub>1</sub> /n                                                                                            |
| <i>a</i> / Å                                                                                                        | 13.1152(19)                        | 13.3538(10)                                                         | 15.7886(4)                                                               | 9.8941(3)                                                                | 15.7038(3)                                                                                                    |
| <i>b</i> / Å                                                                                                        | 9.7918(10)                         | 10.7542(10)                                                         | 10.8211(3)                                                               | 13.9468(4)                                                               | 10.8165(2)                                                                                                    |
| <i>c</i> / Å                                                                                                        | 33.822(4)                          | 15.7395(12)                                                         | 28.7265(8)                                                               | 16.4764(5)                                                               | 28.0637(6)                                                                                                    |
| $\alpha$ / °                                                                                                        | 90                                 | 90                                                                  | 90                                                                       | 102.279(2)                                                               | 90                                                                                                            |
| $\beta$ / °                                                                                                         | 91.189(12)                         | 96.853(7)                                                           | 90.484(3)                                                                | 99.940(2)                                                                | 90.879(2)                                                                                                     |
| $\gamma$ / °                                                                                                        | 90                                 | 90                                                                  | 90                                                                       | 97.712(2)                                                                | 90                                                                                                            |
| Volume / Å <sup>3</sup>                                                                                             | 4342.5(9)                          | 2244.2(3)                                                           | 4907.7(2)                                                                | 2153.46(11)                                                              | 4766.34(16)                                                                                                   |
| <i>Z</i>                                                                                                            | 19                                 | 10                                                                  | 21                                                                       | 9                                                                        | 21                                                                                                            |
| <i>D</i> / g cm <sup>-3</sup>                                                                                       | 1.1332                             | 1.200                                                               | 1.187                                                                    | 1.161                                                                    | 1.165                                                                                                         |
| $\mu$ / mm <sup>-1</sup>                                                                                            | 0.513                              | 1.609                                                               | 0.712                                                                    | 1.407                                                                    | 0.745                                                                                                         |
| <i>F</i> (000)                                                                                                      | 1556.4                             | 842.0                                                               | 1808.0                                                                   | 784.0                                                                    | 1737.0                                                                                                        |
| <i>R</i> <sub>int</sub>                                                                                             | 0.0505                             | 0.0508                                                              | 0.0213                                                                   | 0.0175                                                                   | 0.0170                                                                                                        |
| Goodness-of-fit on <i>F</i> <sup>2</sup>                                                                            | 1.138                              | 1.042                                                               | 1.055                                                                    | 1.112                                                                    | 1.260                                                                                                         |
| <i>R</i> <sub>1</sub> <sup><i>a</i></sup> / <i>wR</i> <sub>2</sub> <sup><i>b</i></sup> [ <i>I</i> > 2σ( <i>I</i> )] | 0.1265/0.3342                      | 0.0836/0.2270                                                       | 0.0859/0.2533                                                            | 0.0655/0.2194                                                            | 0.0902/0.2846                                                                                                 |
| <i>R</i> <sub>1</sub> <sup><i>a</i></sup> / <i>wR</i> <sub>2</sub> <sup><i>b</i></sup> (all data)                   | 0.2141/0.4339                      | 0.0909/0.2423                                                       | 0.0983/0.2739                                                            | 0.0729/0.2324                                                            | 0.1014/0.3053                                                                                                 |
| CCDC number                                                                                                         | 1974156                            | 1974157                                                             | 1974158                                                                  | 1974159                                                                  | 1974160                                                                                                       |

|                                                                                                                     | <b>Rh(III) complex II</b>                                                                     | <b>Rh(III) complex I</b>                            |
|---------------------------------------------------------------------------------------------------------------------|-----------------------------------------------------------------------------------------------|-----------------------------------------------------|
| Empirical formula                                                                                                   | C <sub>10.43</sub> H <sub>10.78</sub> N <sub>1.04</sub> Rh <sub>0.35</sub> Cl <sub>0.35</sub> | C <sub>30</sub> H <sub>31</sub> N <sub>3</sub> RhCl |
| Formula weight                                                                                                      | 178.22                                                                                        | 571.94                                              |
| Crystal system                                                                                                      | monoclinic                                                                                    | monoclinic                                          |
| Space group                                                                                                         | I2/a                                                                                          | C2/c                                                |
| <i>a</i> / Å                                                                                                        | 22.2459(7)                                                                                    | 30.7434(11)                                         |
| <i>b</i> / Å                                                                                                        | 9.7093(4)                                                                                     | 9.7093(4)                                           |
| <i>c</i> / Å                                                                                                        | 25.0566(9)                                                                                    | 22.2459(7)                                          |
| $\alpha$ / °                                                                                                        | 90                                                                                            | 90                                                  |
| $\beta$ / °                                                                                                         | 99.165(3)                                                                                     | 126.426(3)                                          |
| $\gamma$ / °                                                                                                        | 90                                                                                            | 90                                                  |
| Volume / Å <sup>3</sup>                                                                                             | 5342.9(3)                                                                                     | 5343.0(4)                                           |
| <i>Z</i>                                                                                                            | 23                                                                                            | 8                                                   |
| <i>D</i> / g cm <sup>-3</sup>                                                                                       | 1.274                                                                                         | 1.422                                               |
| $\mu$ / mm <sup>-1</sup>                                                                                            | 1.355                                                                                         | 6.255                                               |
| <i>F</i> (000)                                                                                                      | 2155.0                                                                                        | 2352.0                                              |
| <i>R</i> <sub>int</sub>                                                                                             | 0.0894                                                                                        | 0.0894                                              |
| Goodness-of-fit on <i>F</i> <sup>2</sup>                                                                            | 1.955                                                                                         | 1.316                                               |
| <i>R</i> <sub>1</sub> <sup><i>a</i></sup> / <i>wR</i> <sub>2</sub> <sup><i>b</i></sup> [ <i>I</i> > 2σ( <i>I</i> )] | 0.0868/0.2267                                                                                 | 0.0864/0.2632                                       |
| <i>R</i> <sub>1</sub> <sup><i>a</i></sup> / <i>wR</i> <sub>2</sub> <sup><i>b</i></sup> (all data)                   | 0.1199/0.2794                                                                                 | 0.1193/ 0.3161                                      |
| CCDC number                                                                                                         | 1974161                                                                                       | 1974162                                             |

<sup>*a*</sup>  $R_1 = \Sigma||F_o| - |F_c||/\Sigma|F_o|$ . <sup>*b*</sup>  $wR_2 = [\Sigma w(|F_o|^2 - |F_c|^2)]/[\Sigma w(F_o)^2]^{1/2}$ , where  $w = 1/[\sigma^2(F_o^2) + (aP)^2 + bP]$ .  $P = (F_o^2 + 2F_c^2)/3$ .

## 8. Copy of NMR ( $^1\text{H}$ , $^{13}\text{C}$ , $^{19}\text{F}$ ) Spectra

Compound 3aa

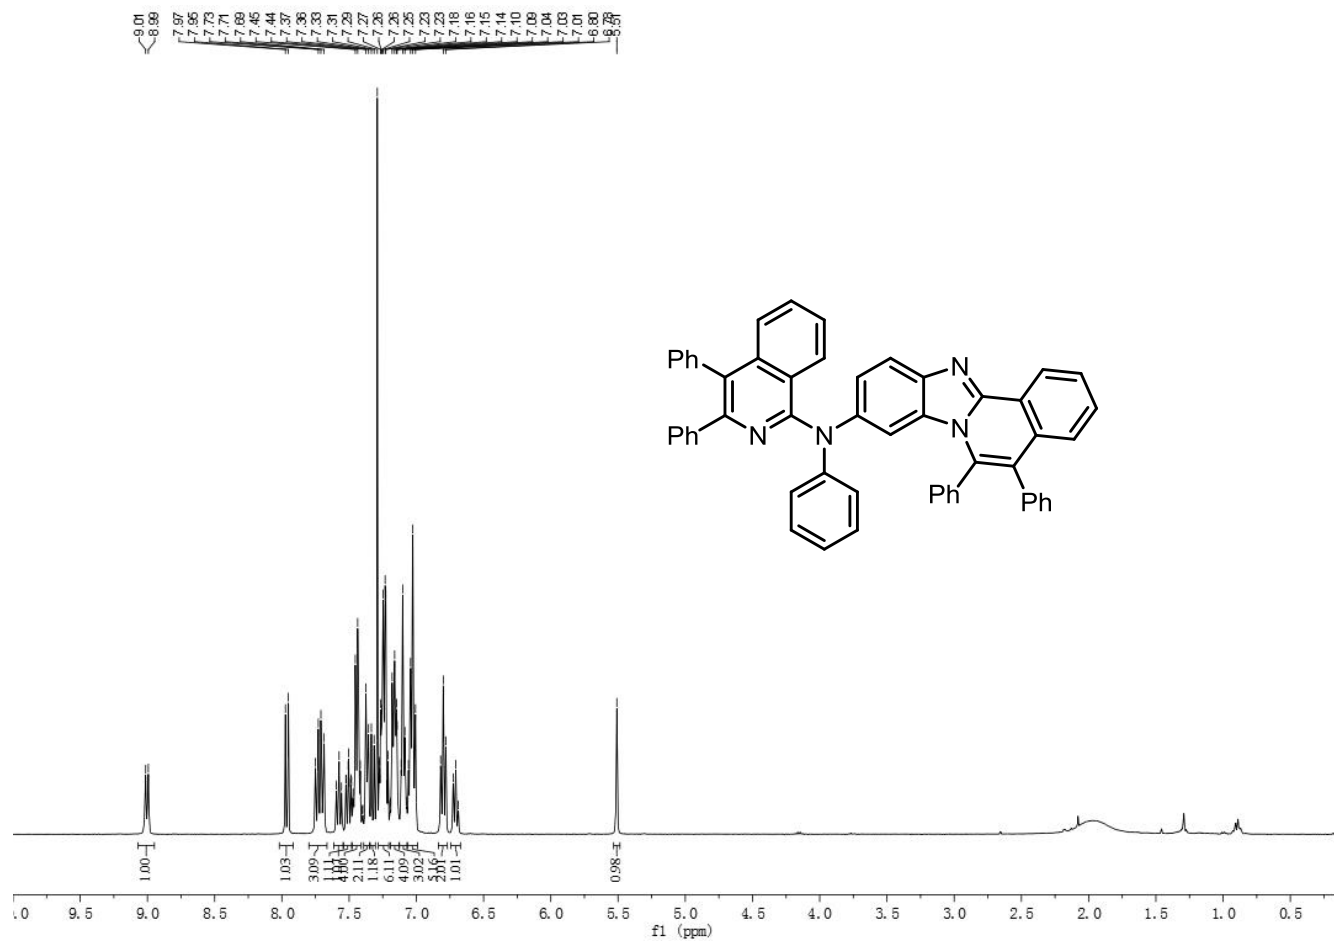

7zE838FC57A  
 yys-10/huang-tm

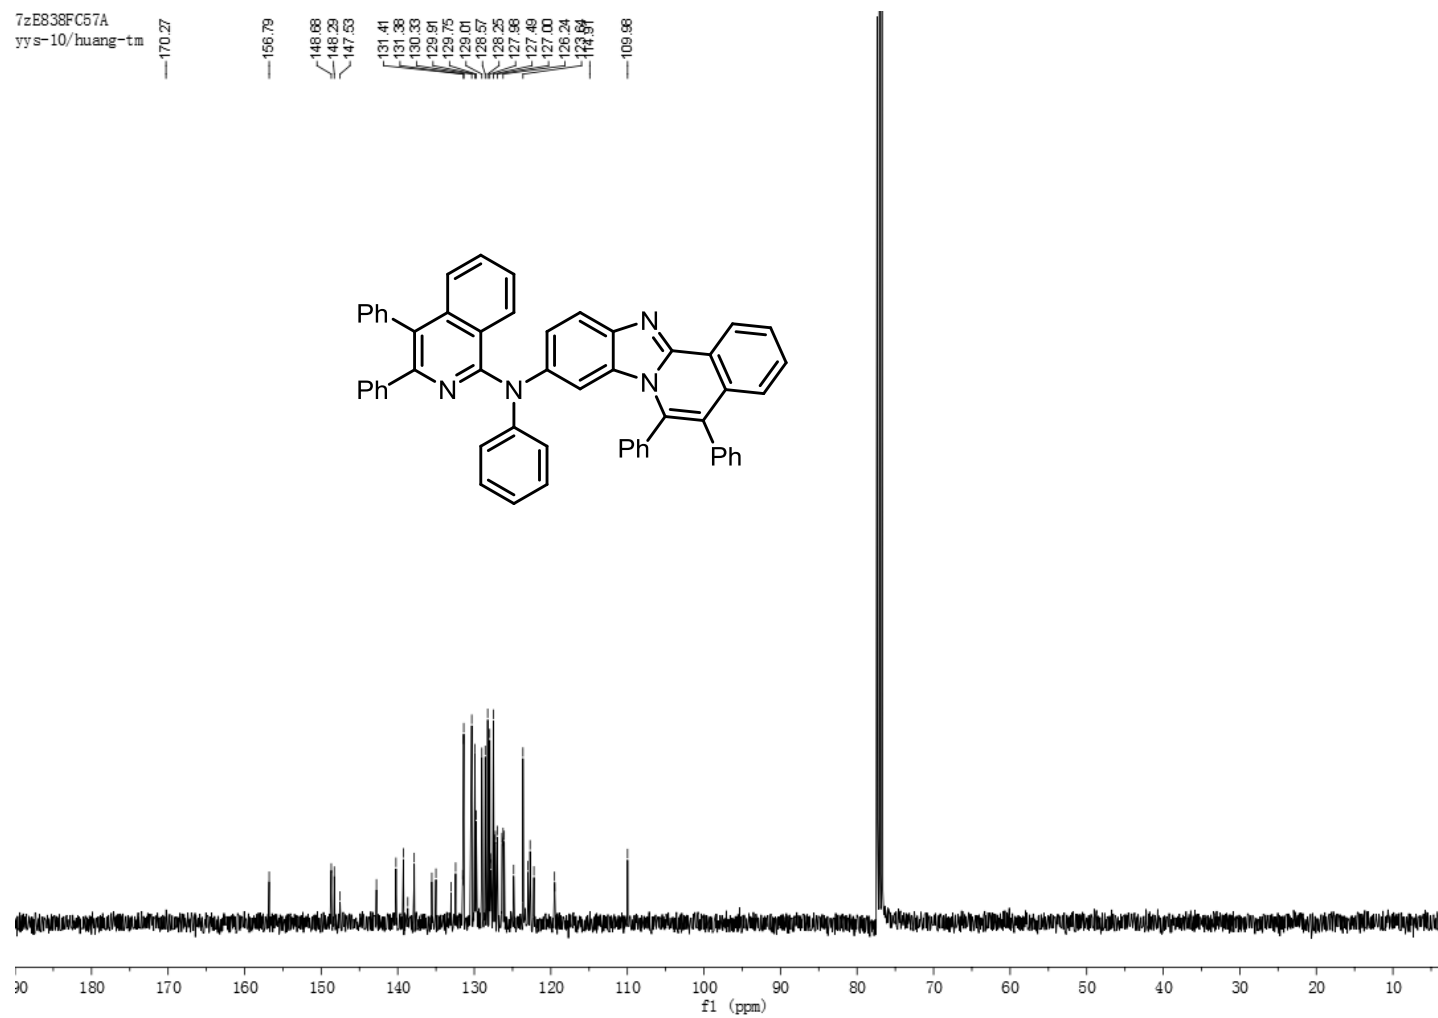



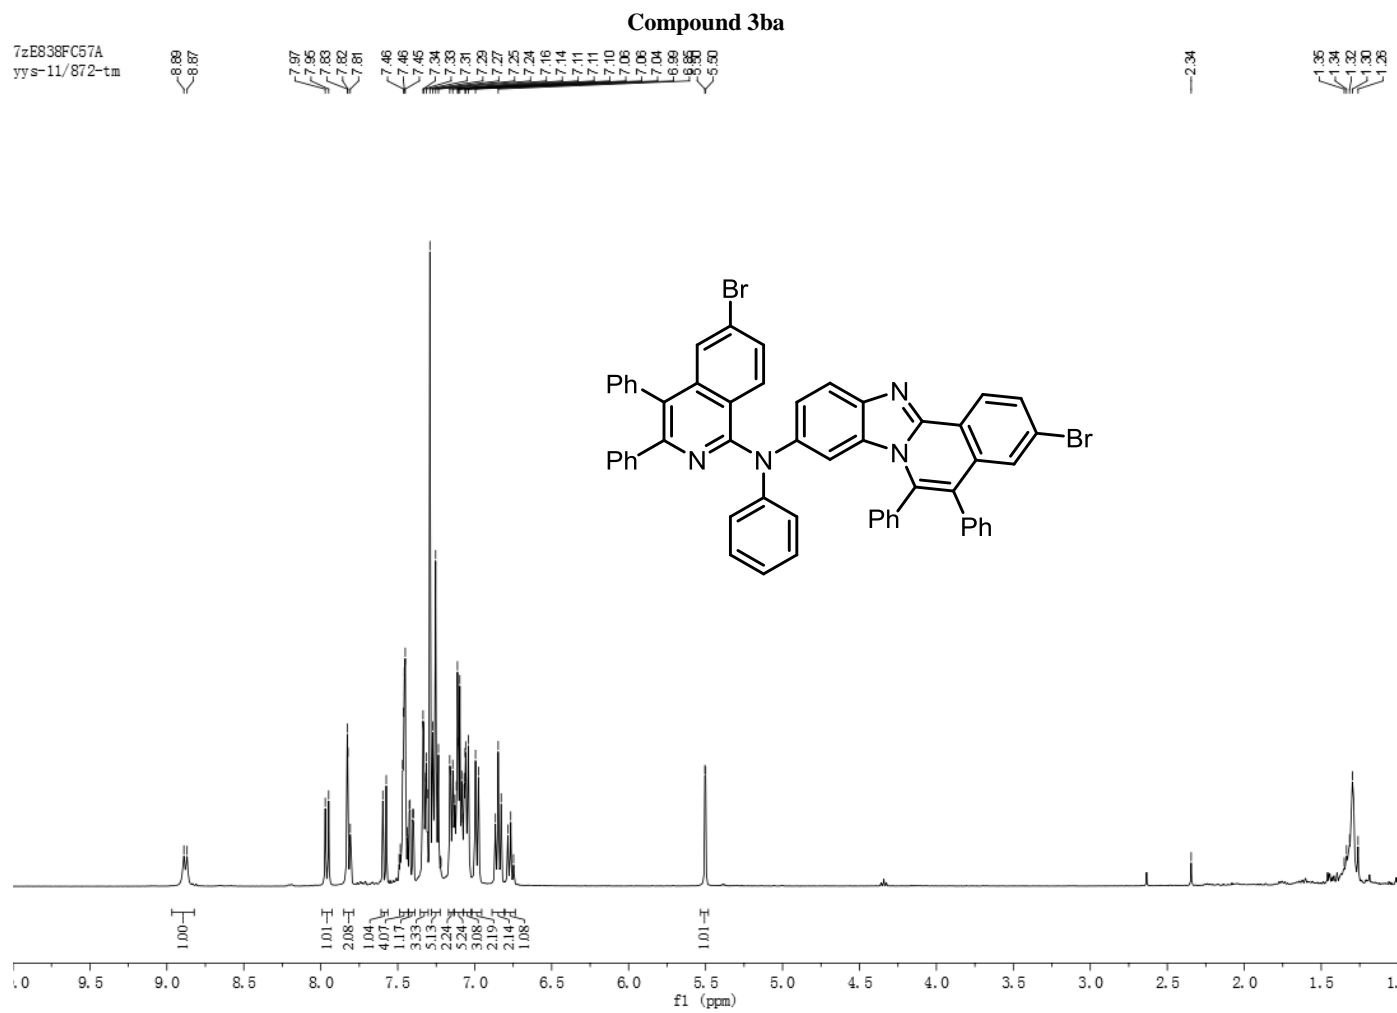

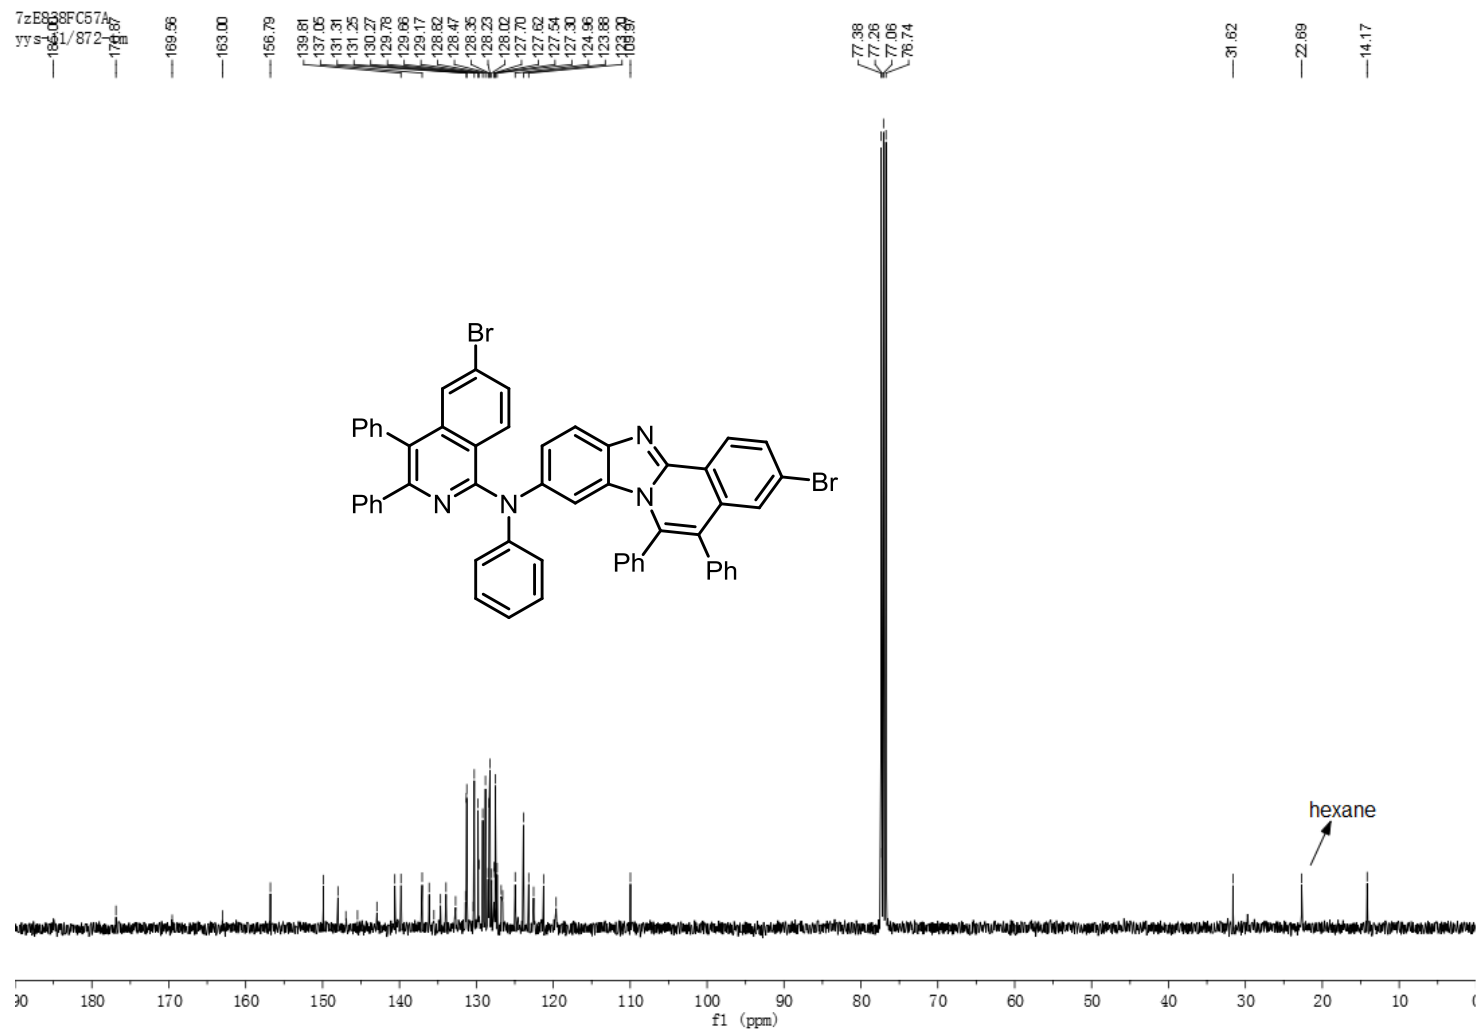

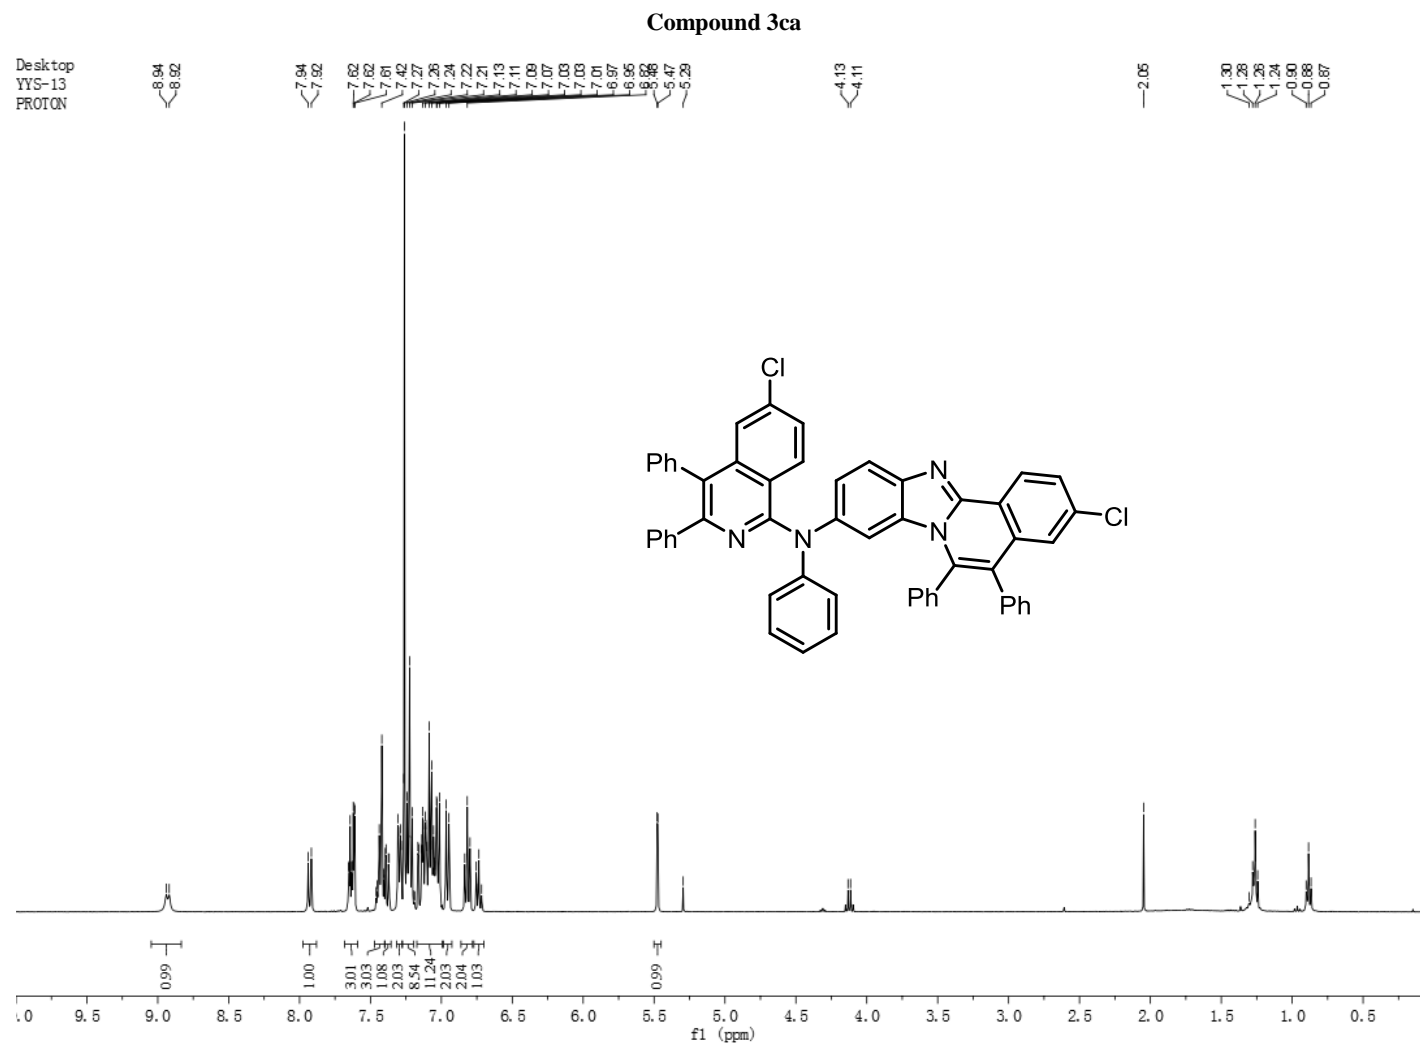

YYS-13-C-ok  
yys-13

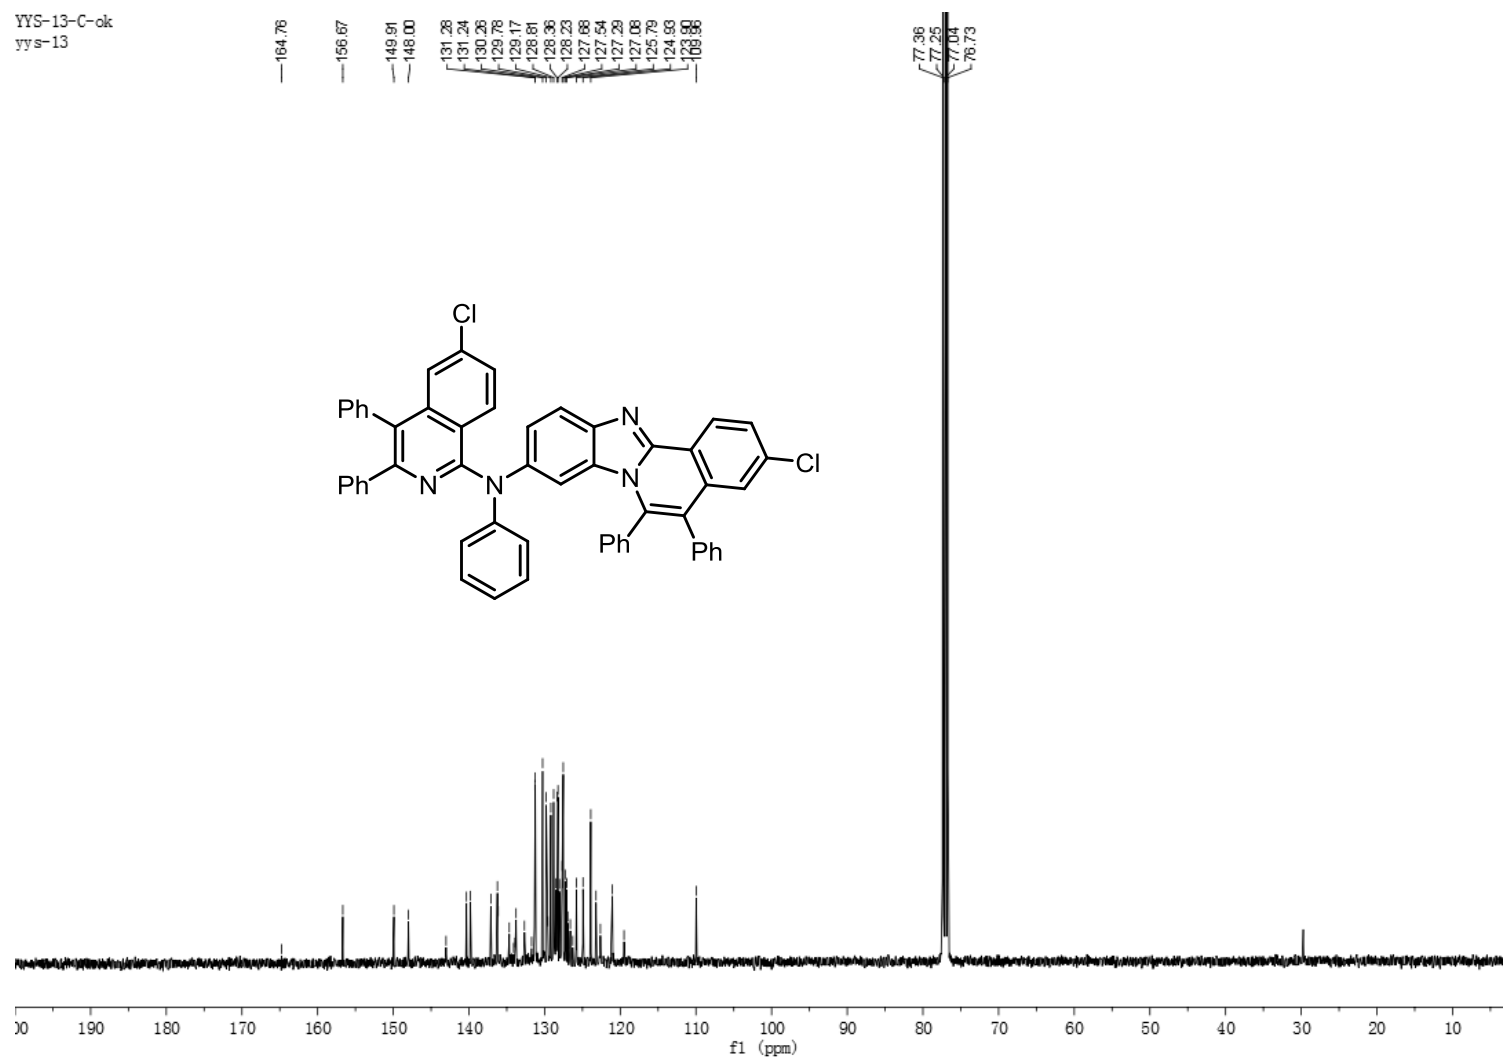

# Compound 3da

7zEB38FC57A  
yys-12/873-tm

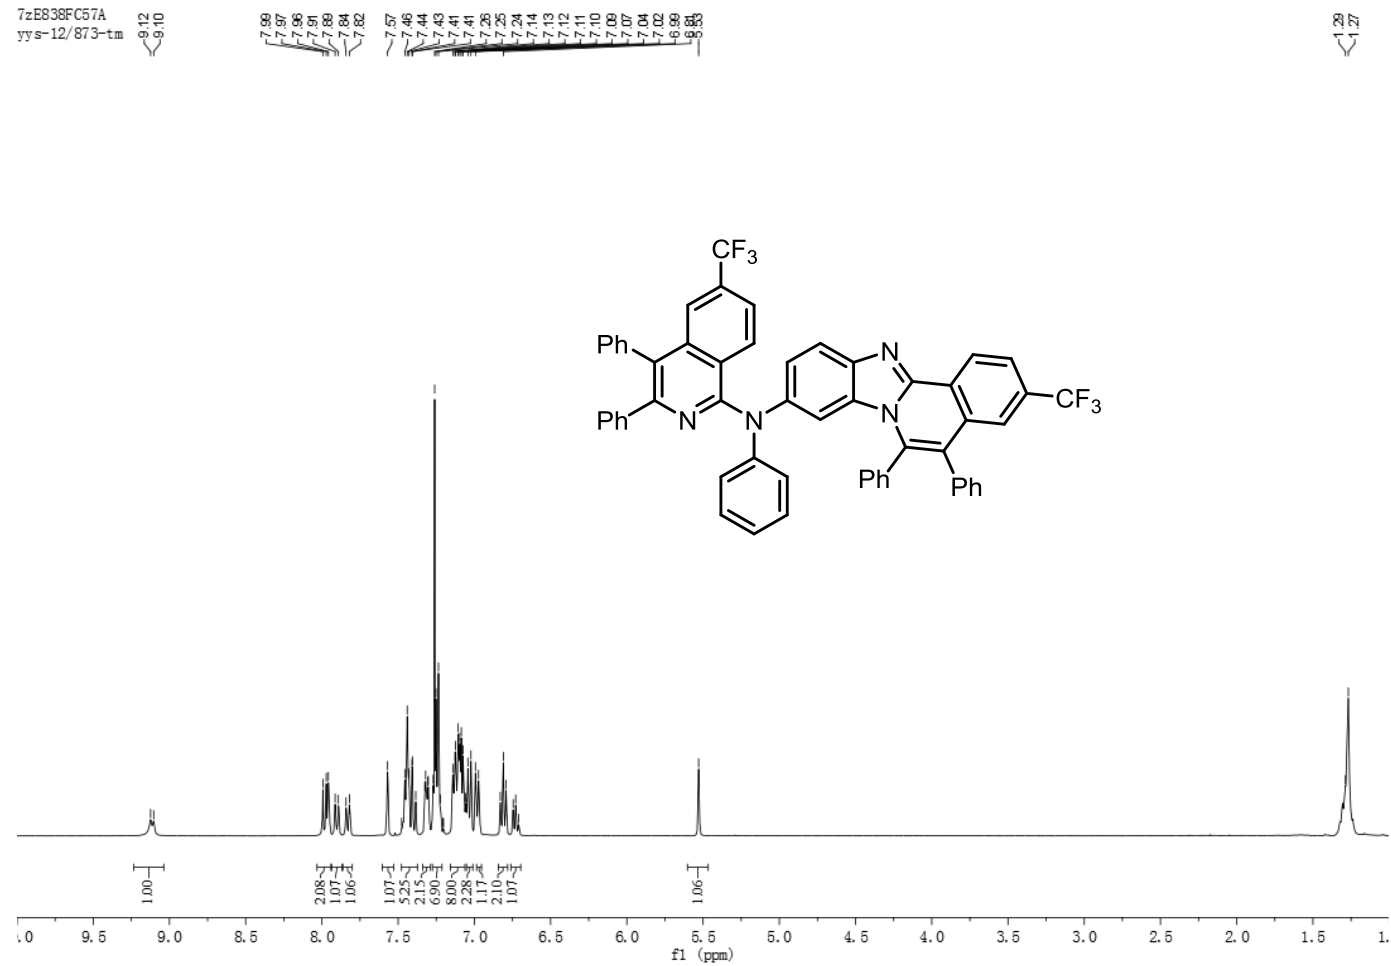

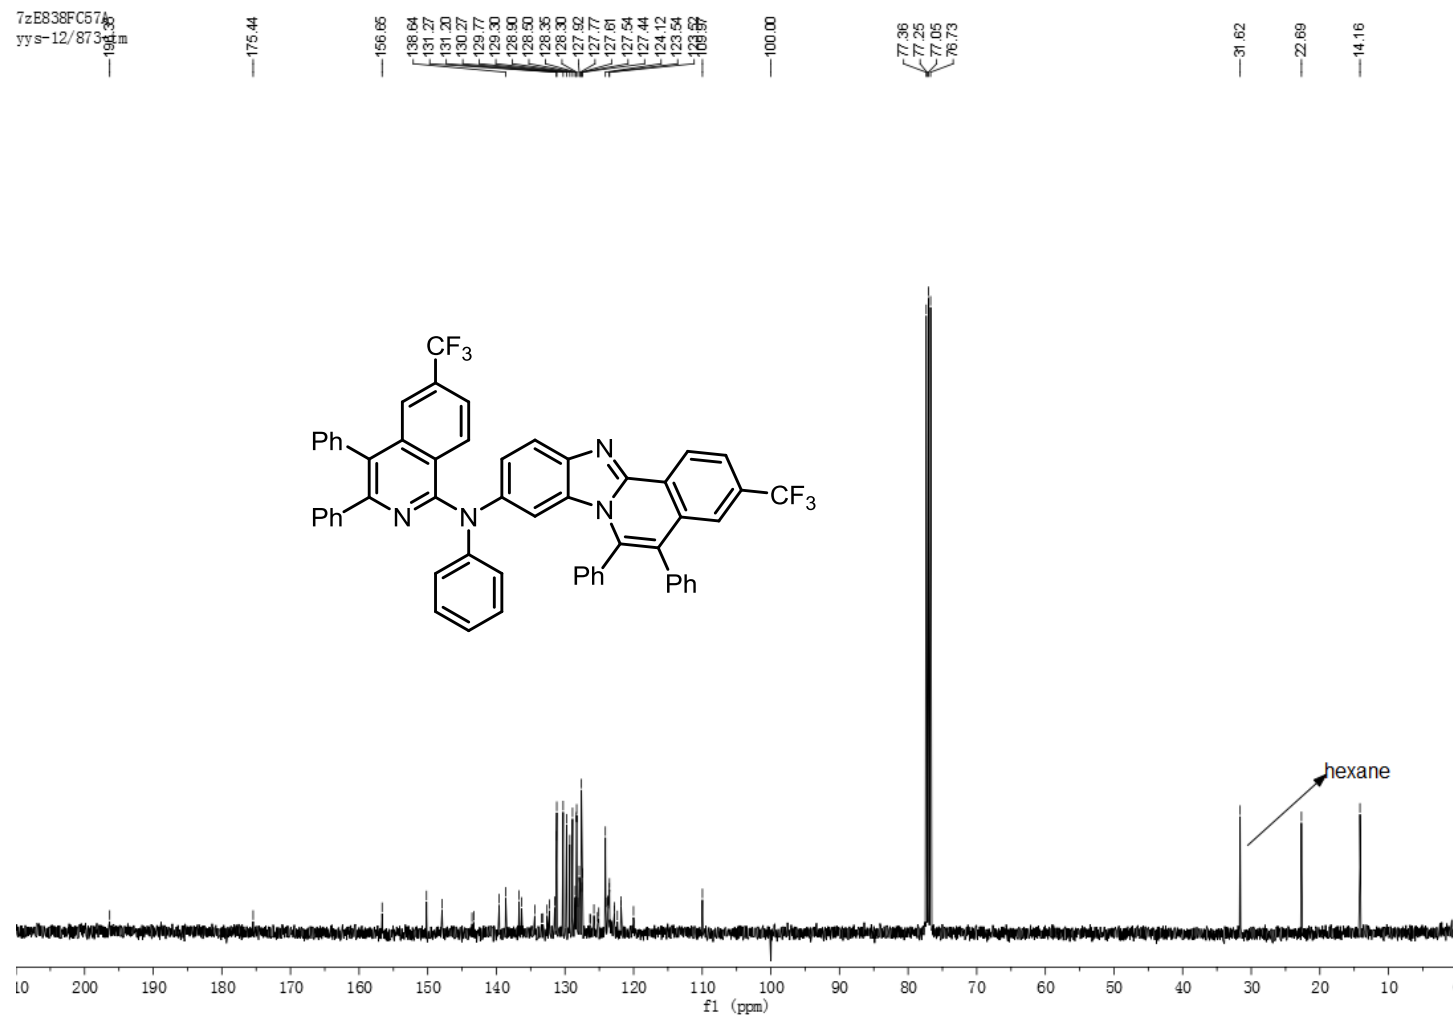

7zE838FC57A  
yys-12/873-tm

62.40  
62.94

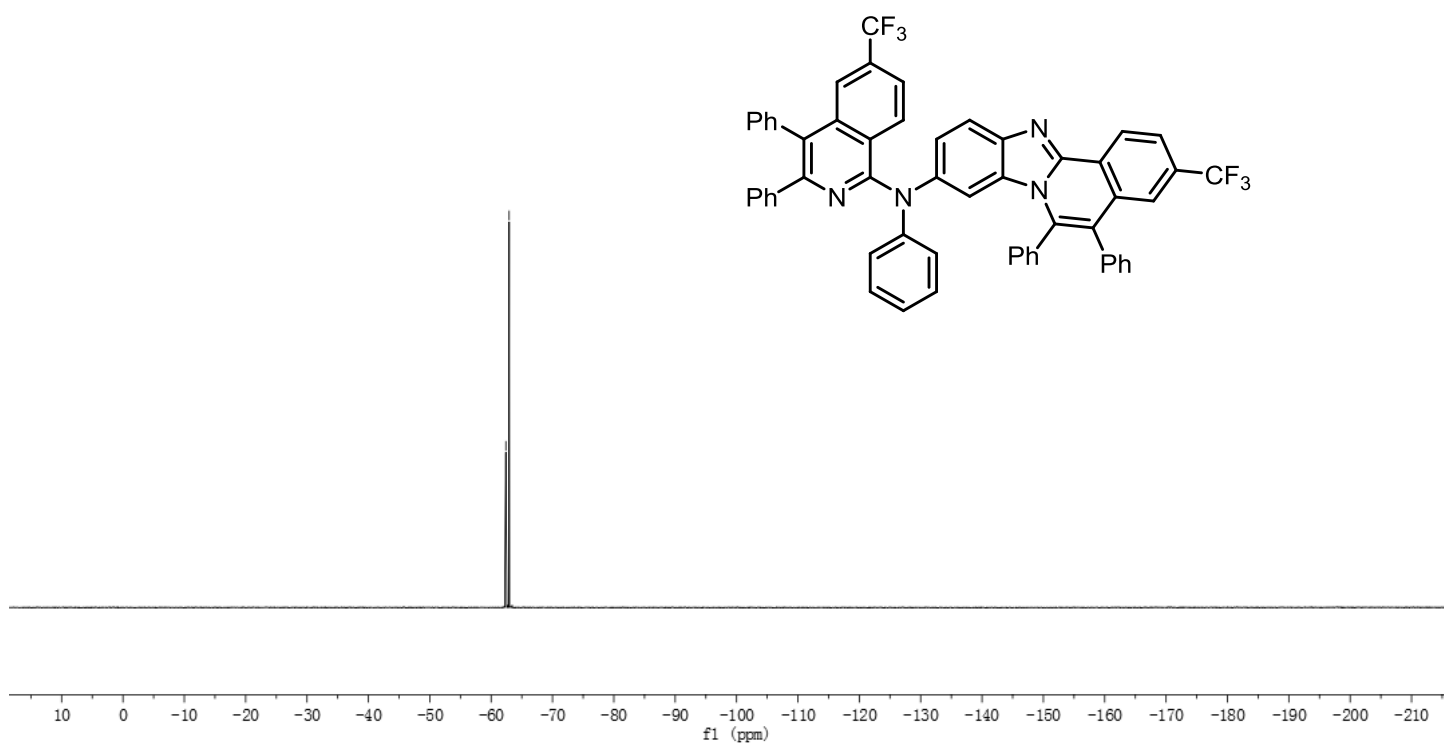

Compound 3ea

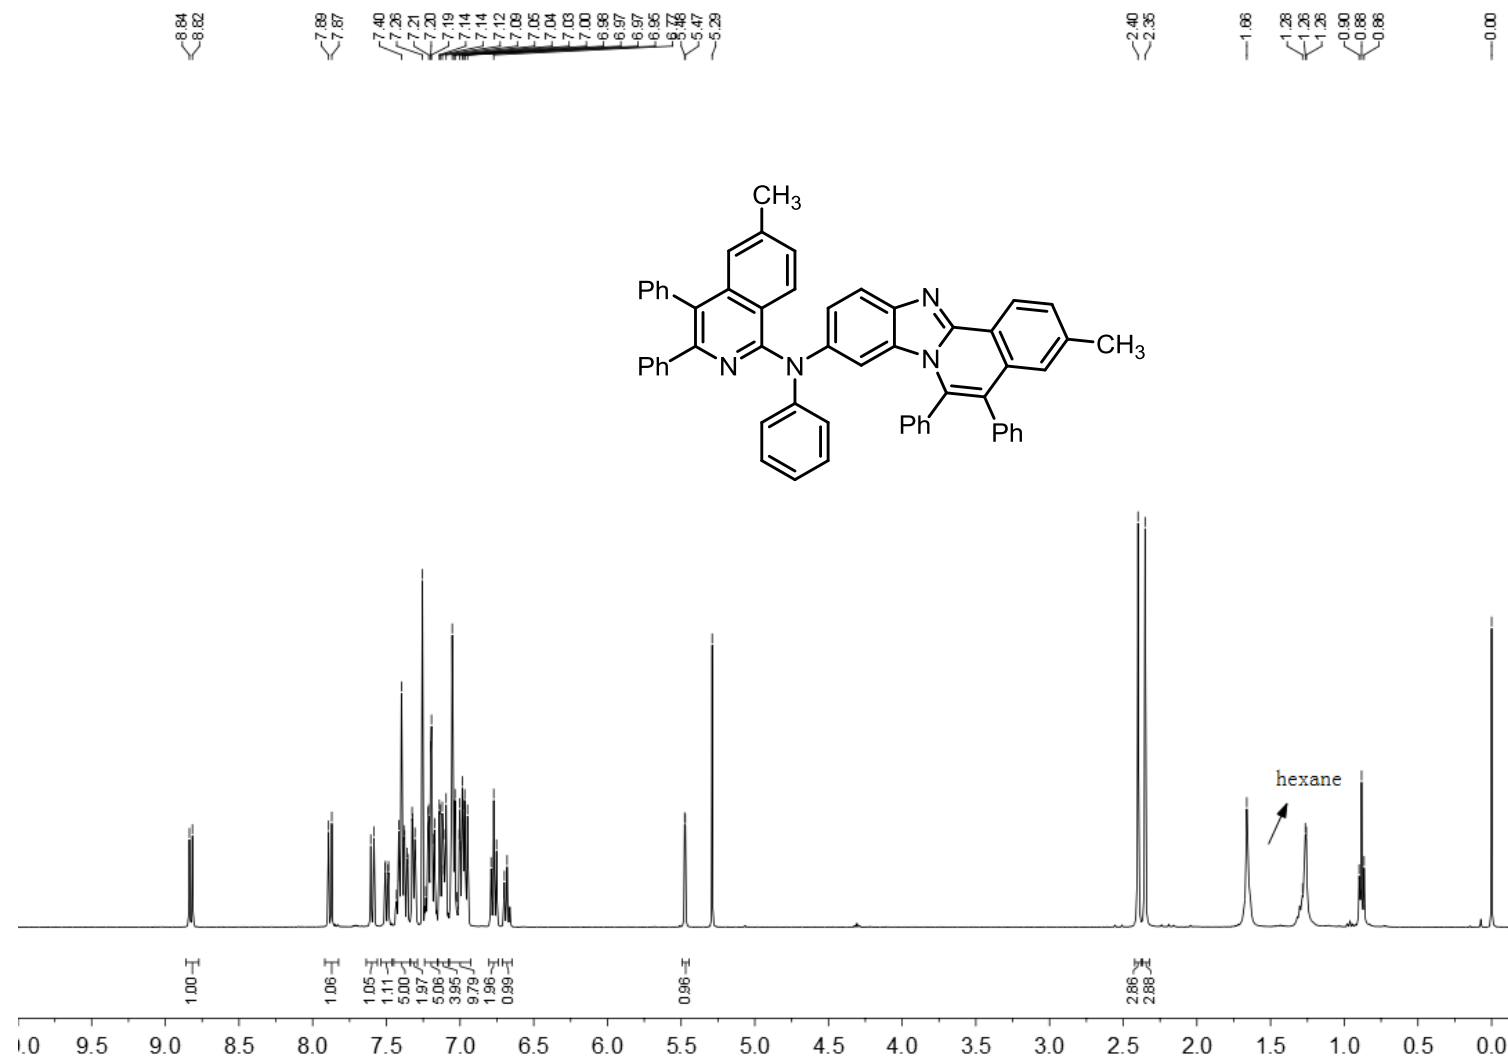



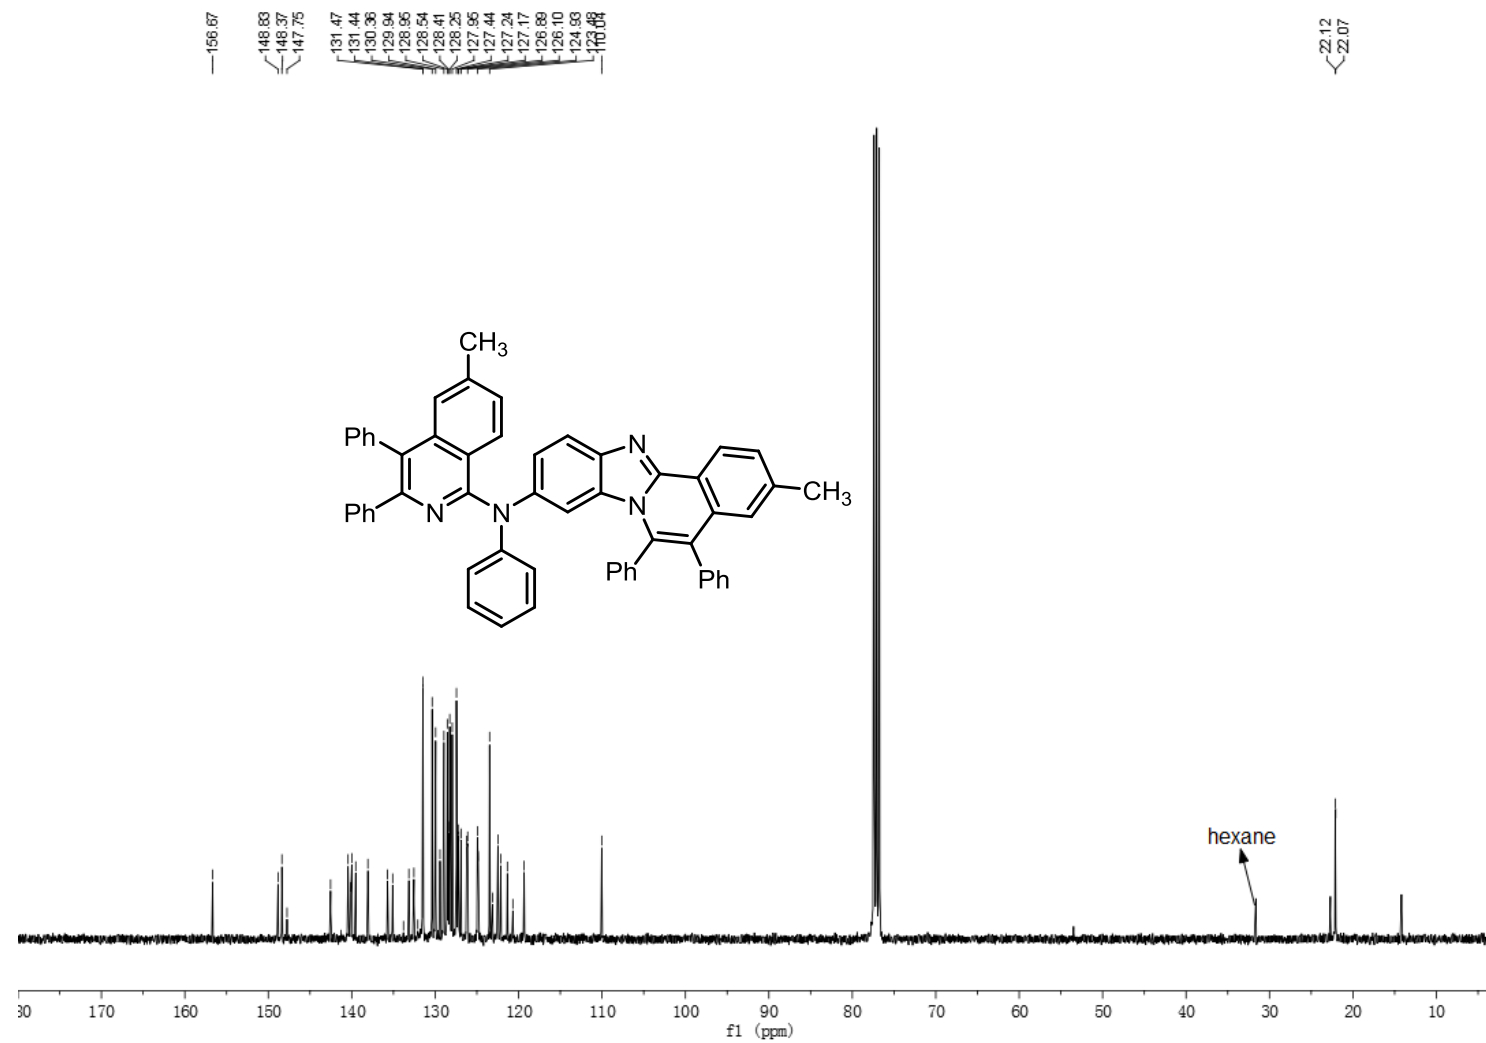

Compound 3fa

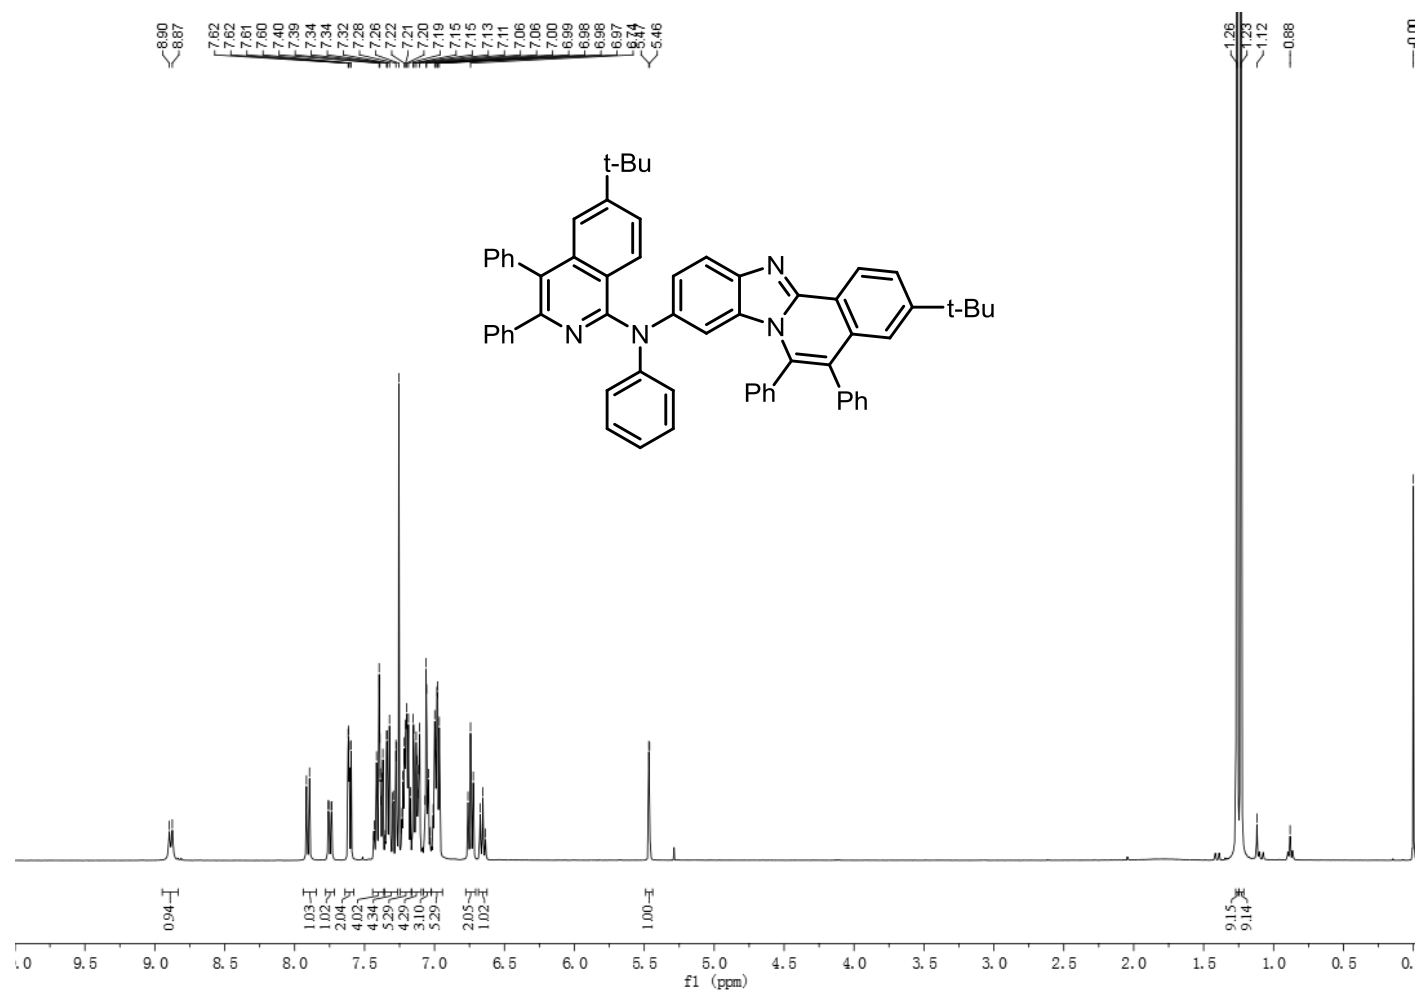

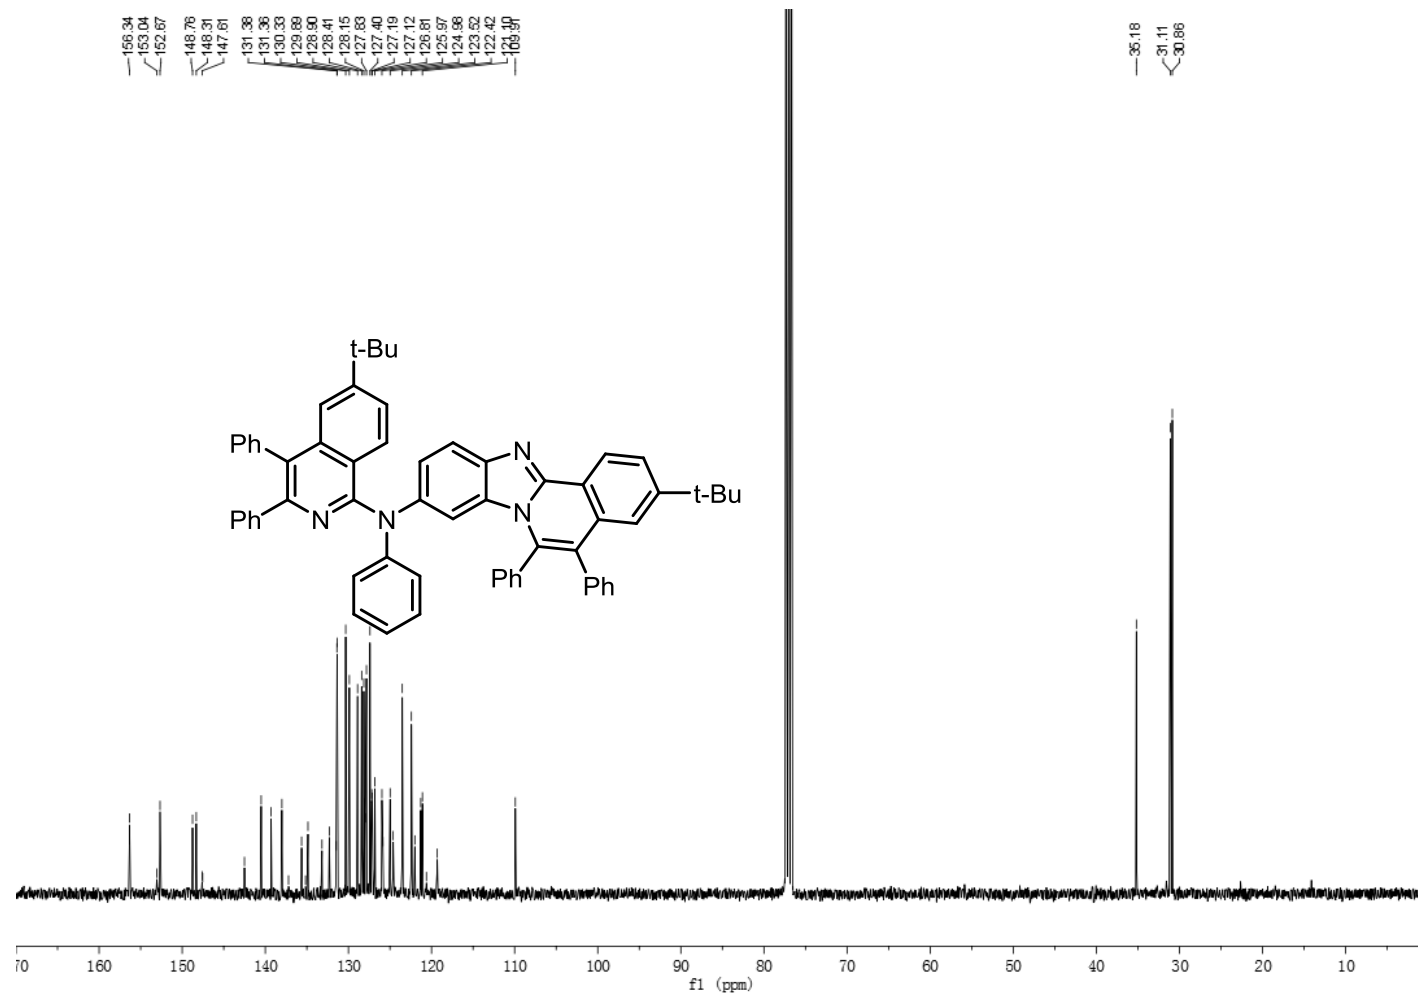

Compound 3ga

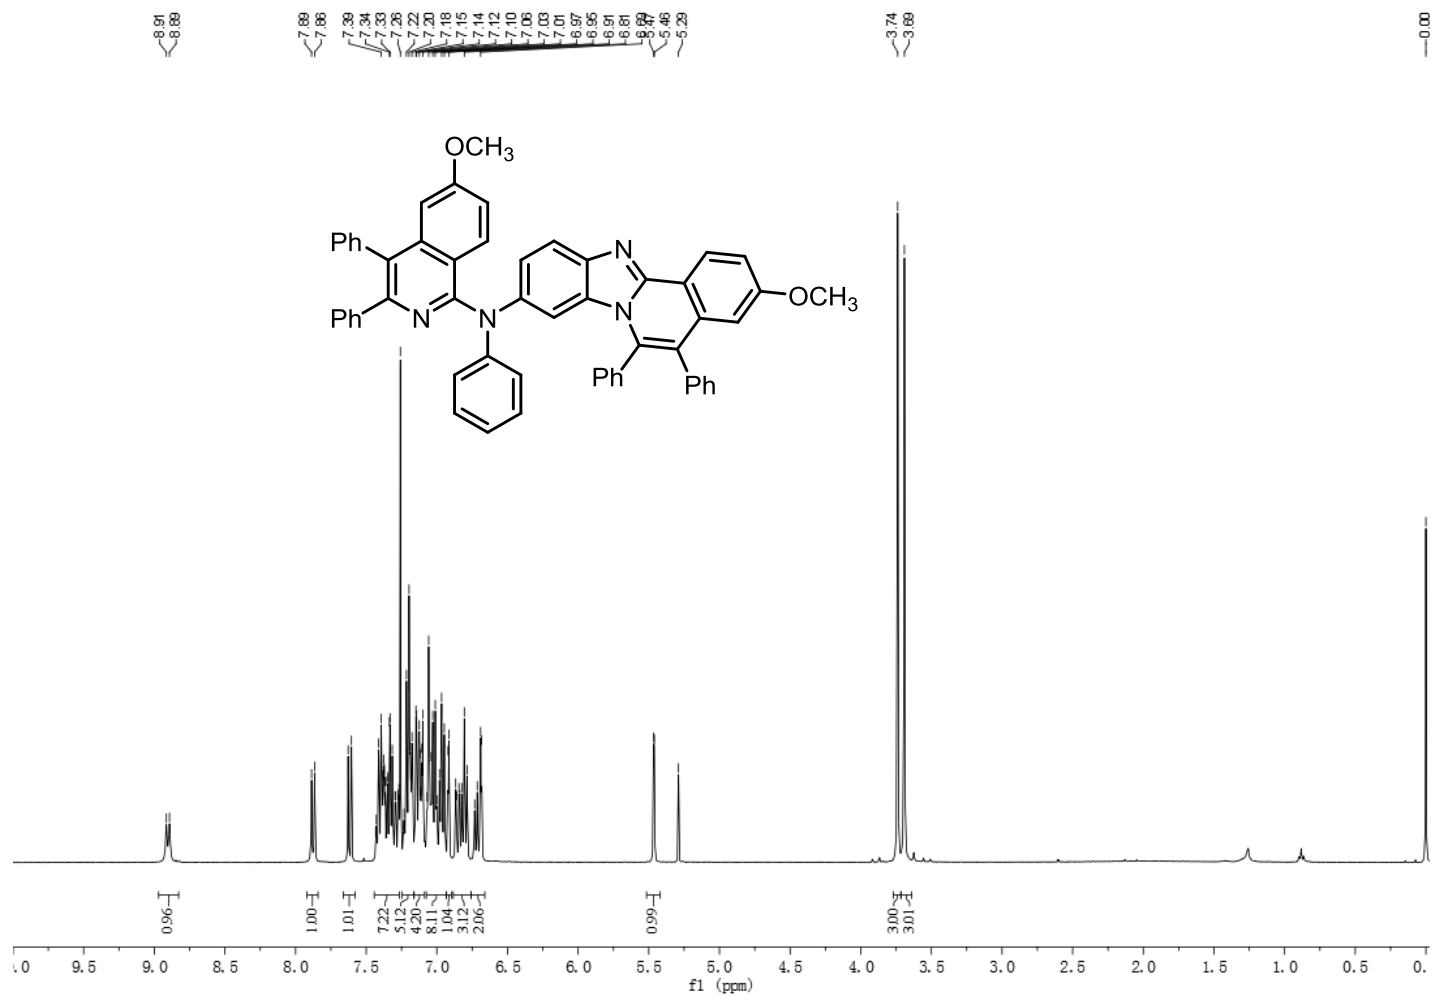

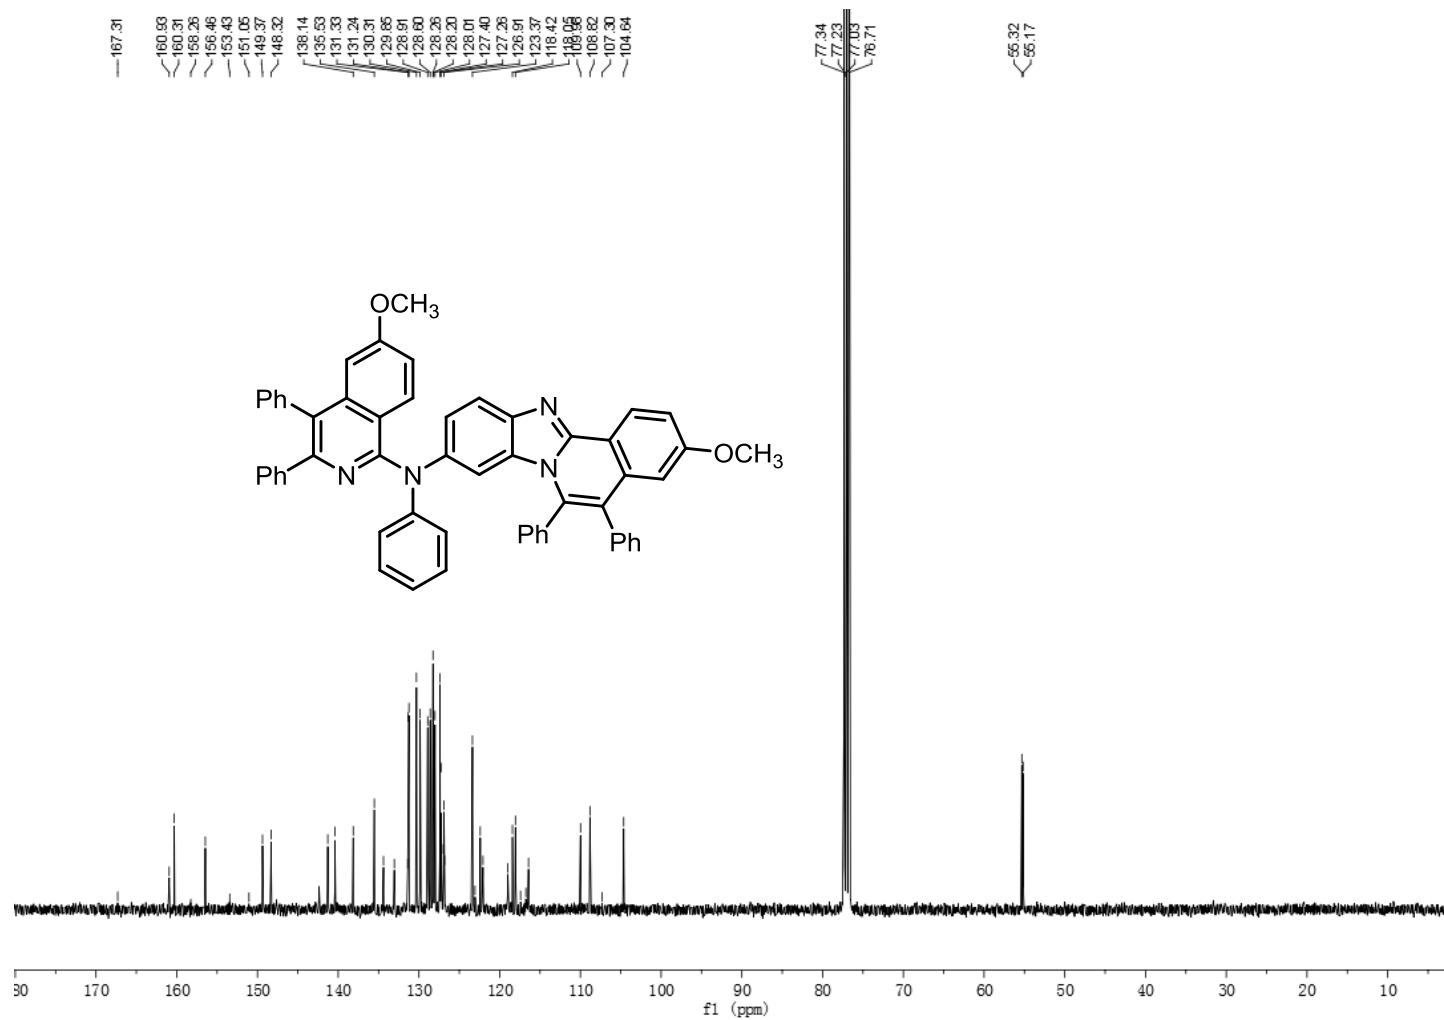

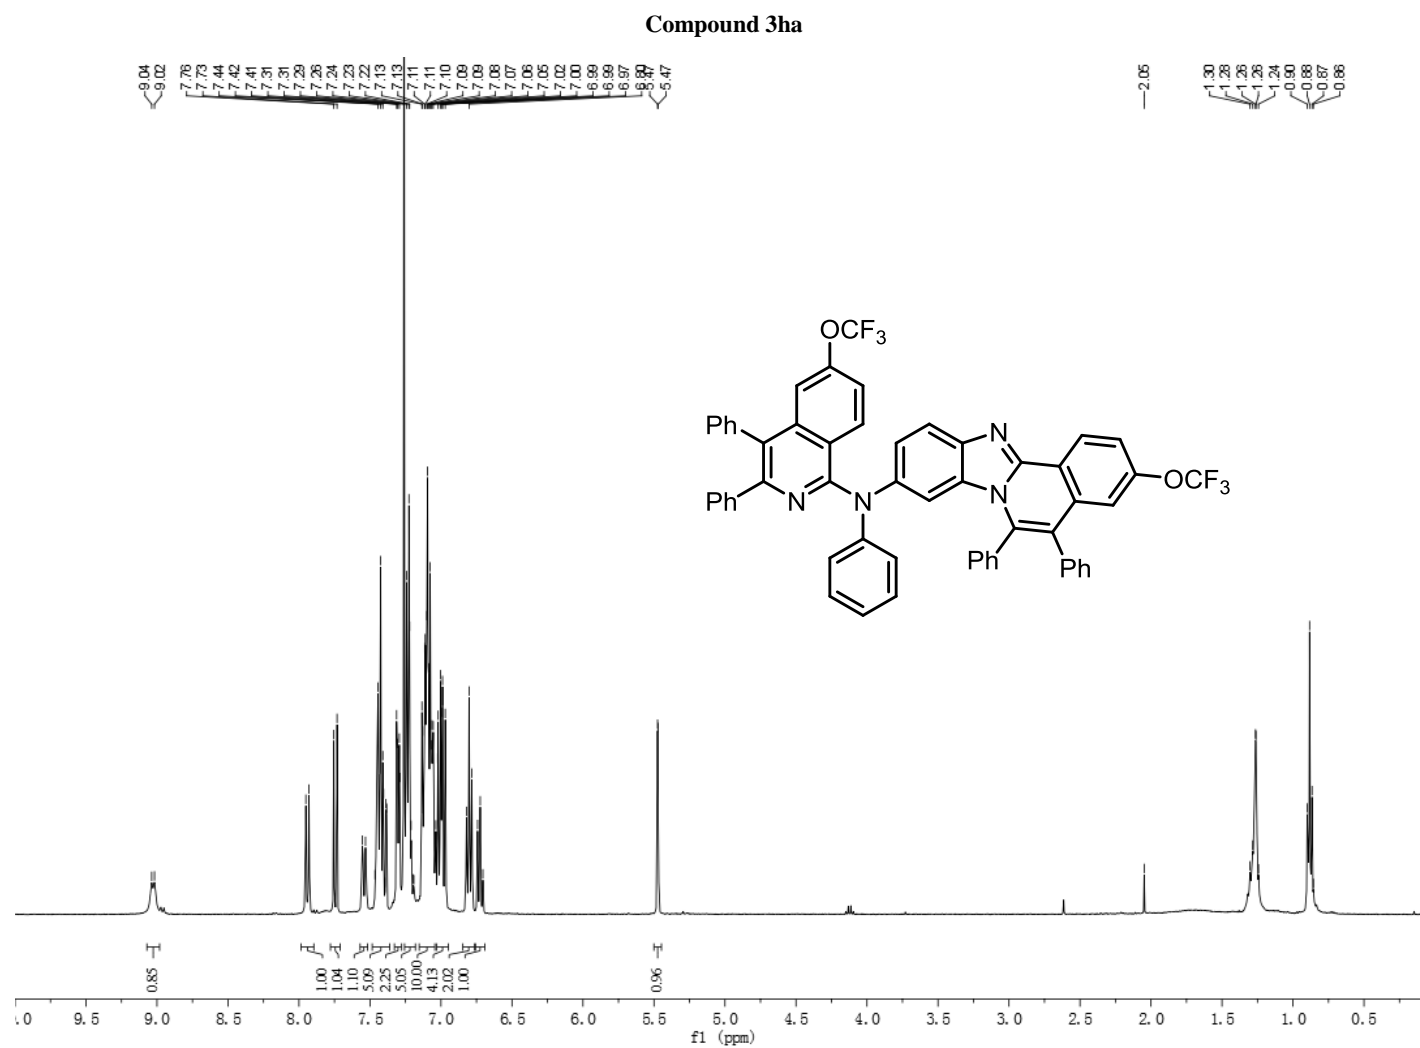

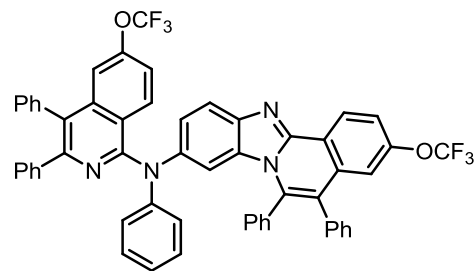

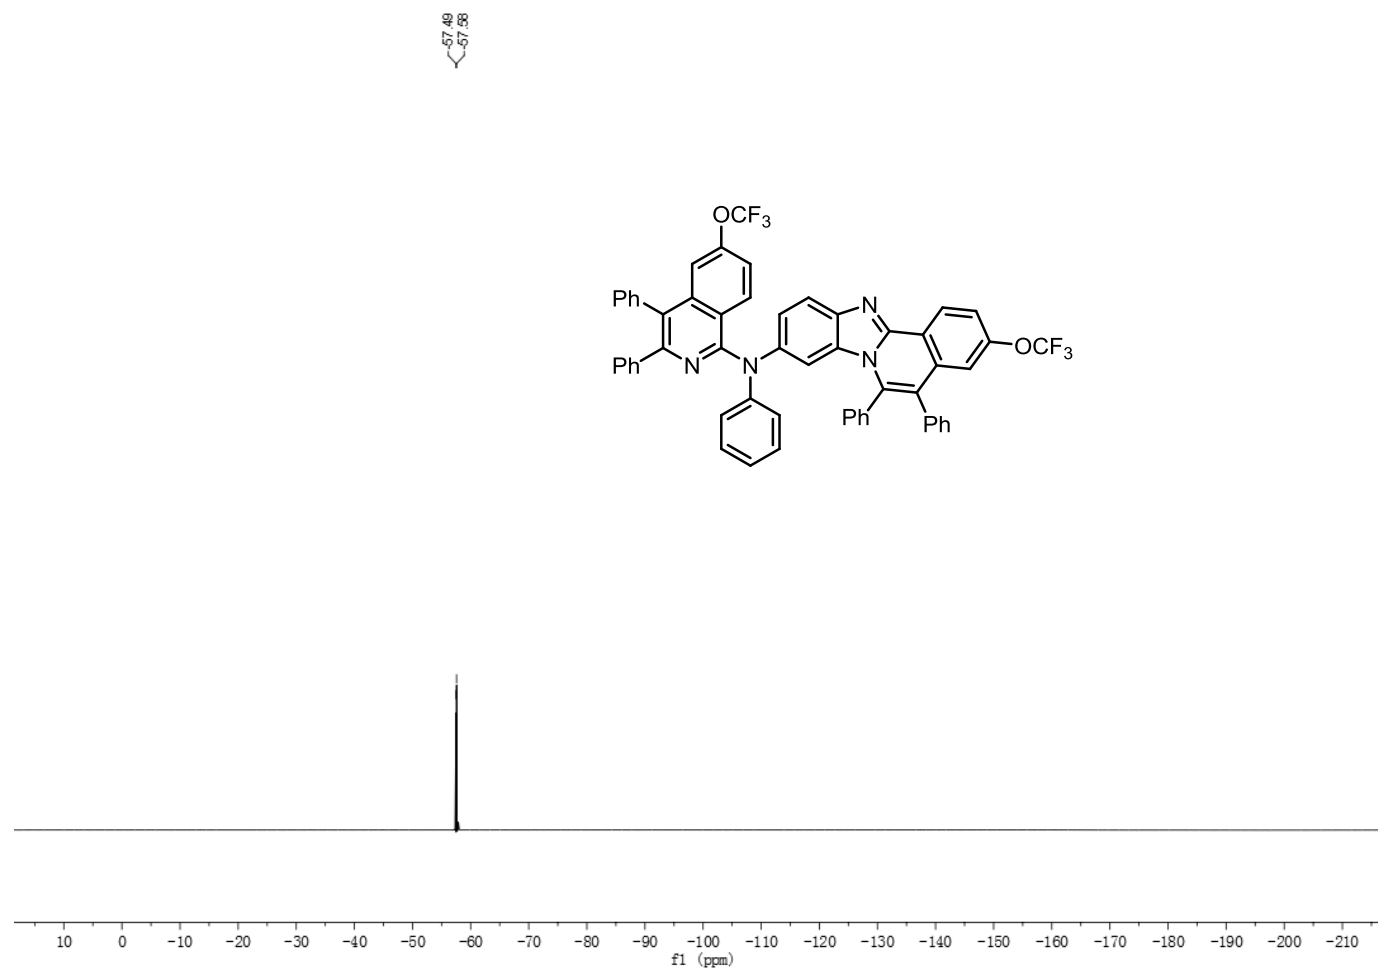



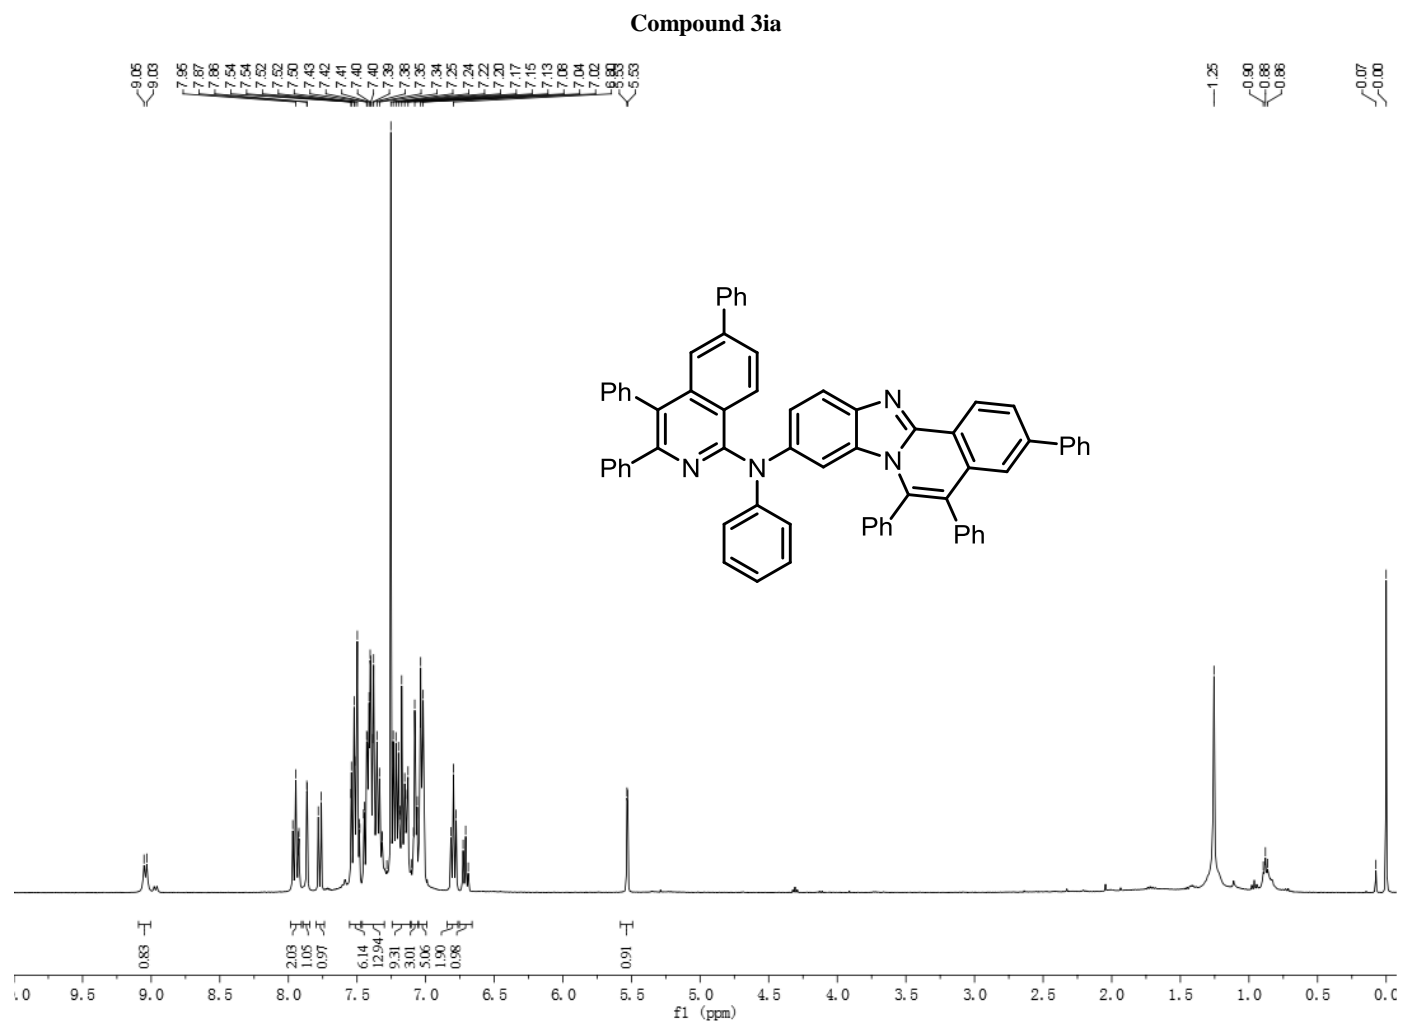

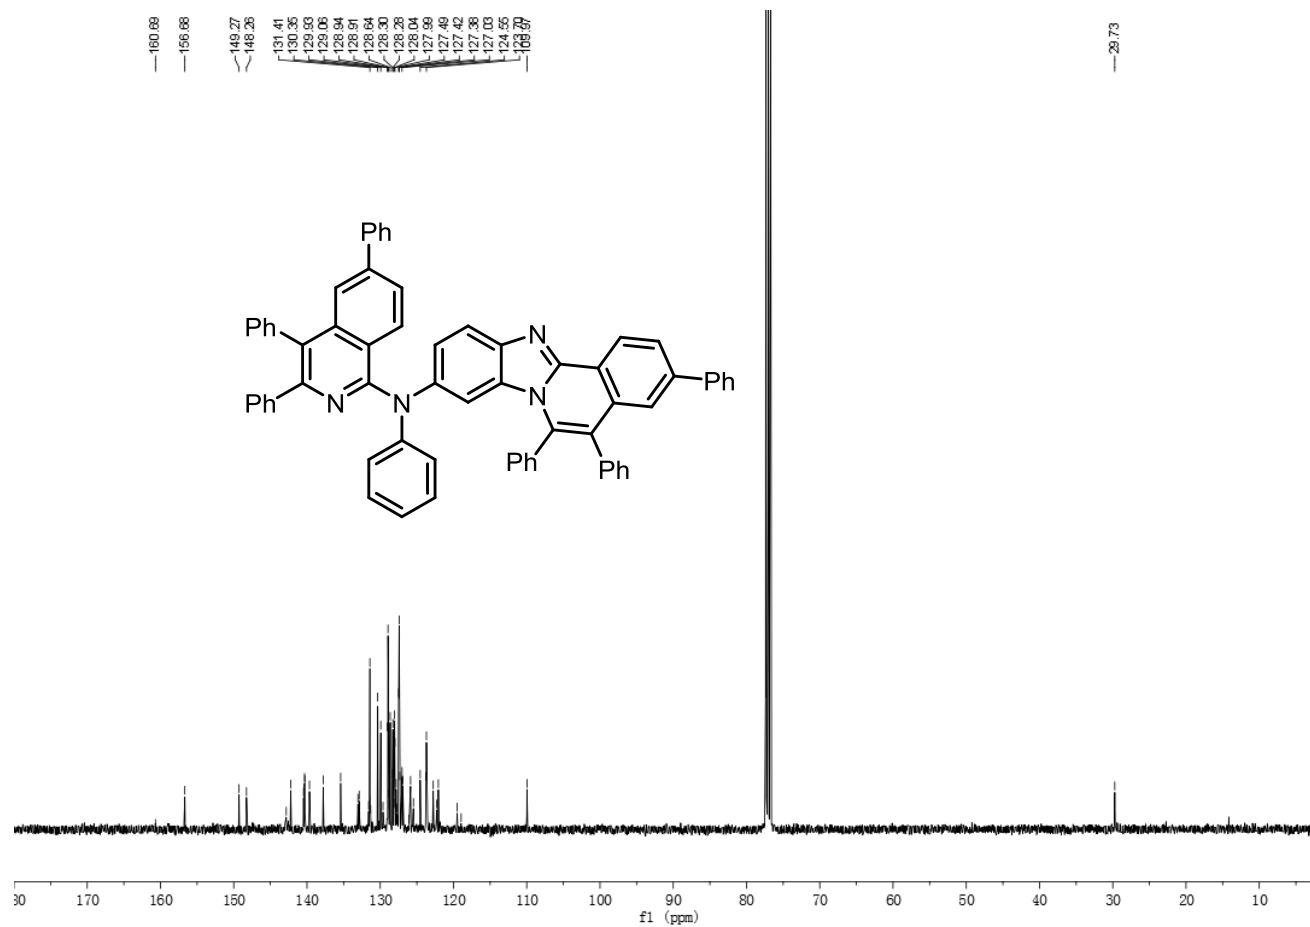

Compound 3ja

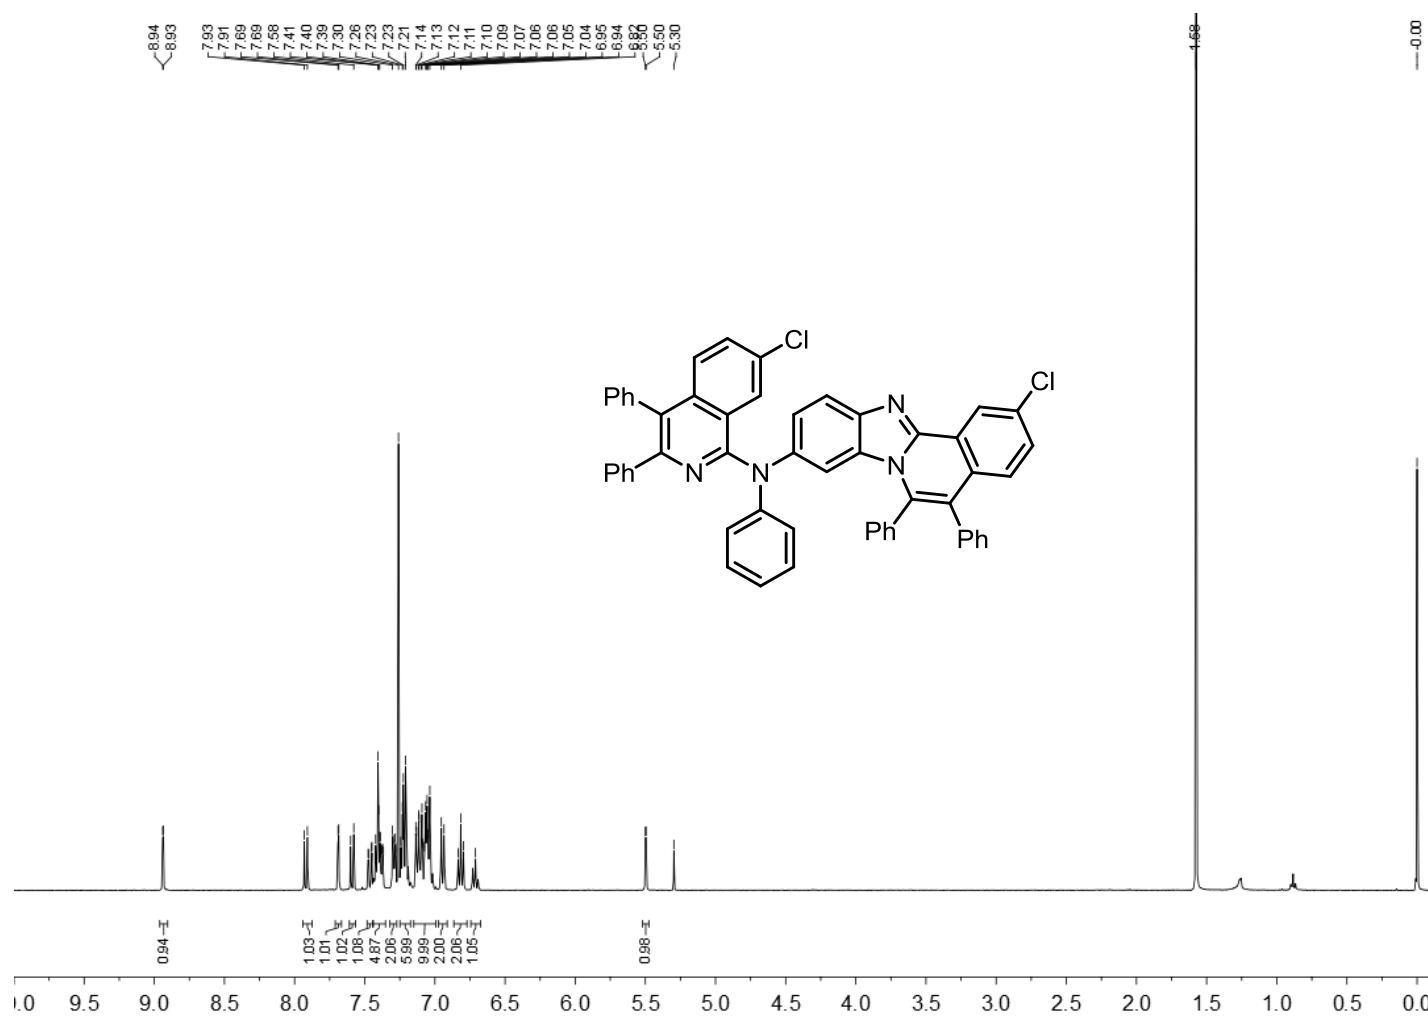

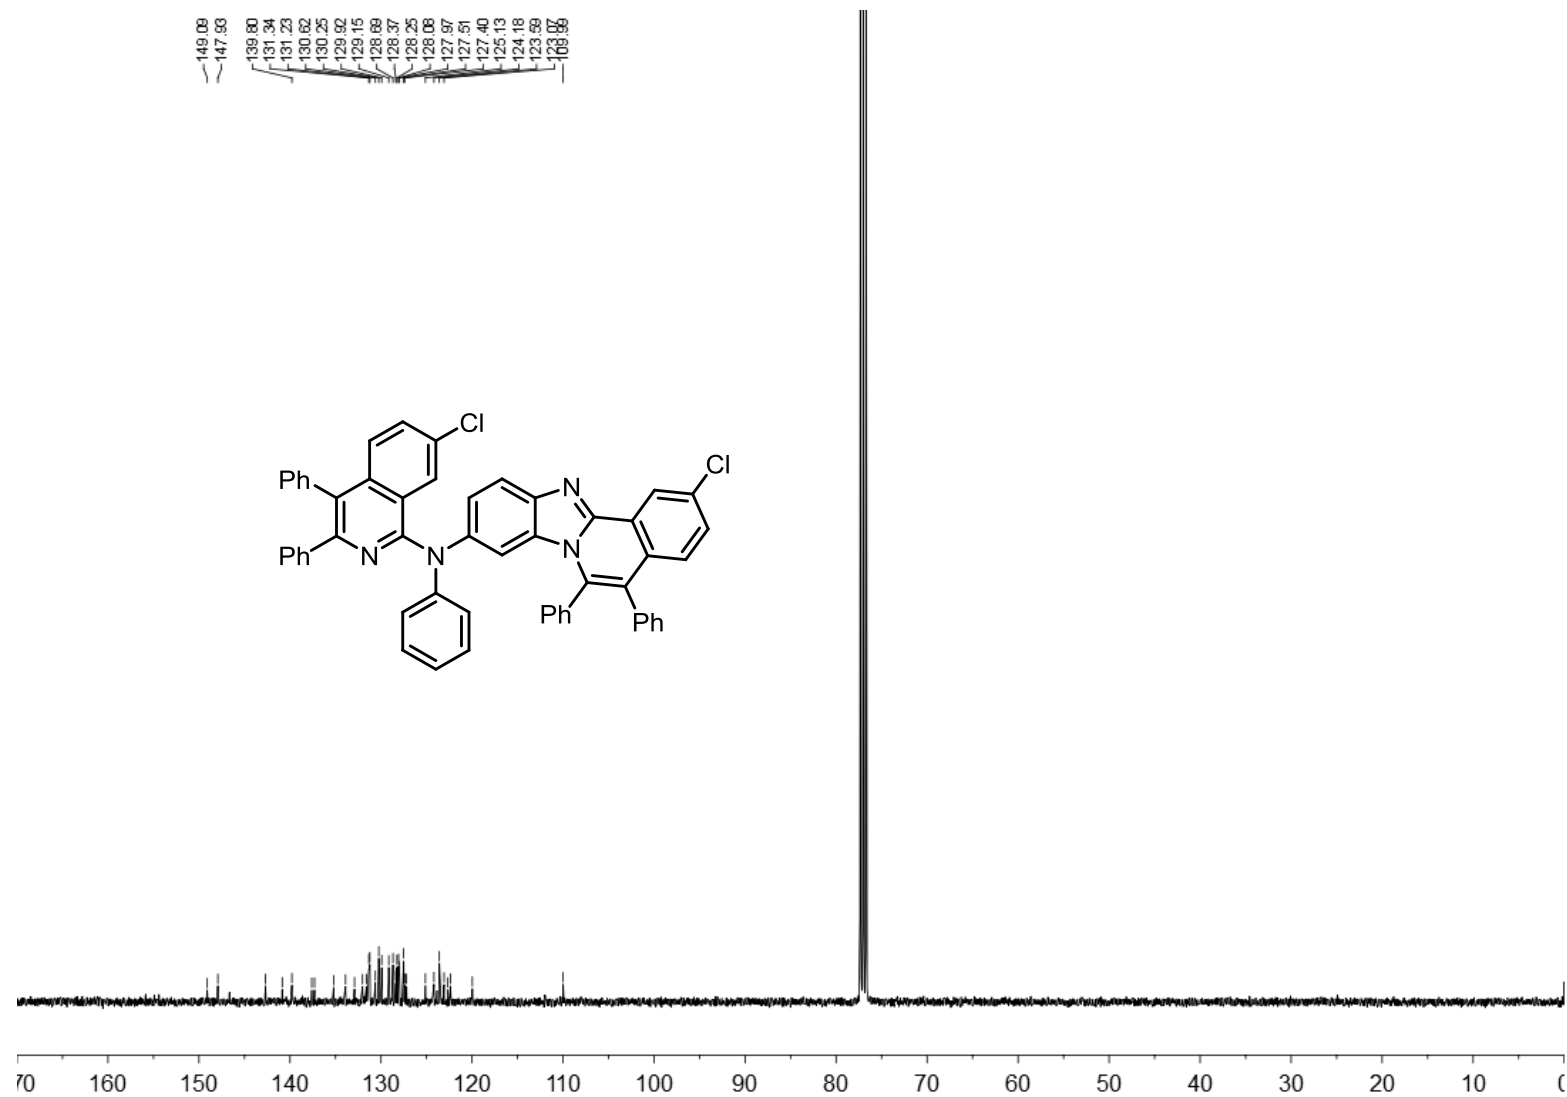

Chemical structure of compound 10: A complex molecule featuring a quinoline ring system substituted with two phenyl groups and a chlorine atom, connected via a nitrogen atom to a benzimidazole ring system, which is further substituted with two phenyl groups and a chlorine atom.

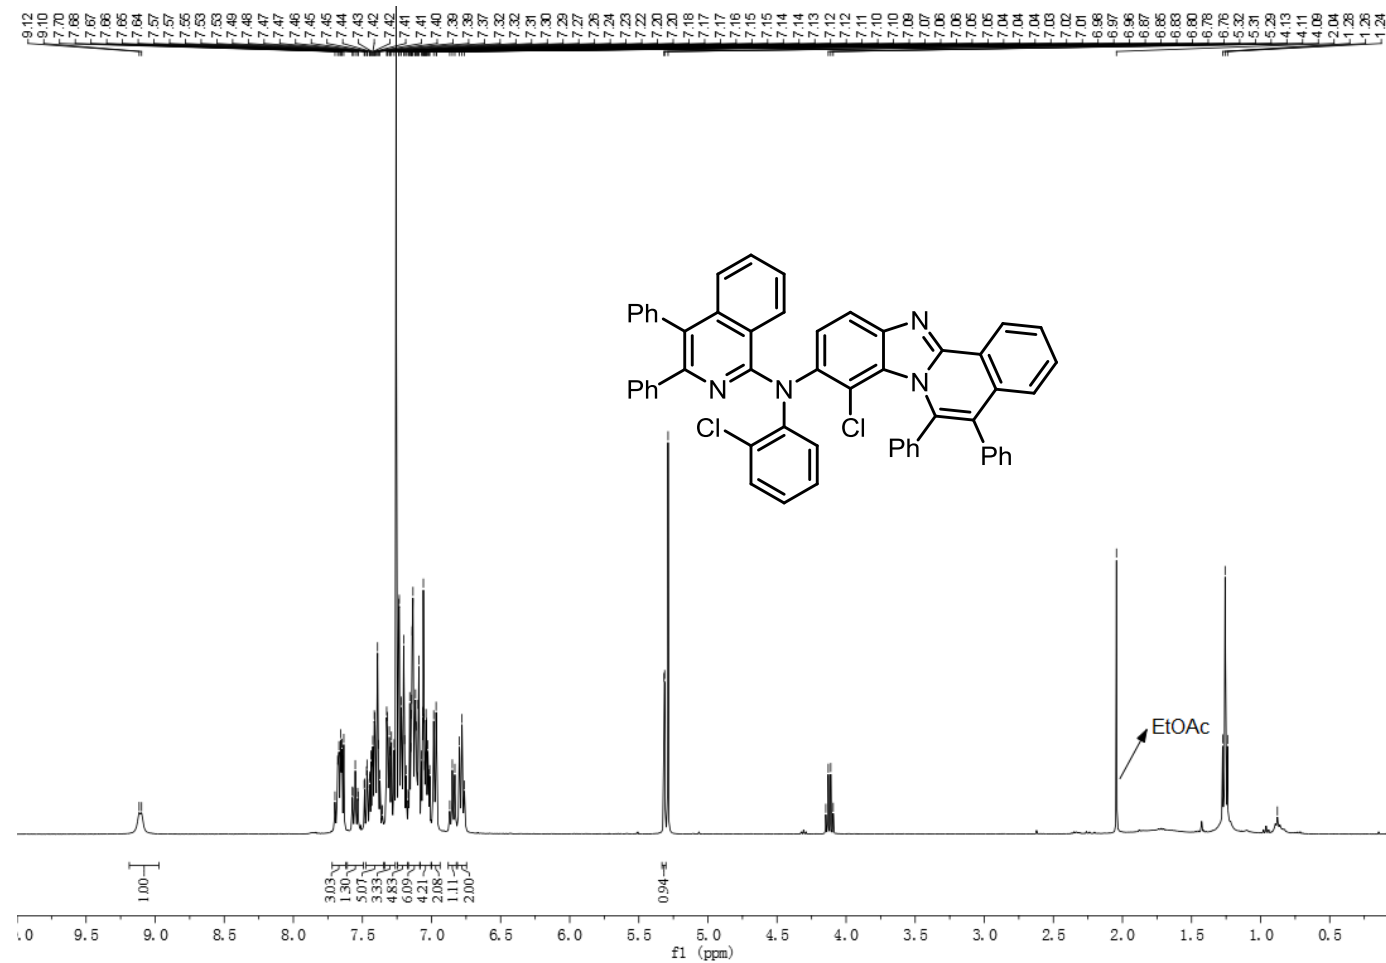

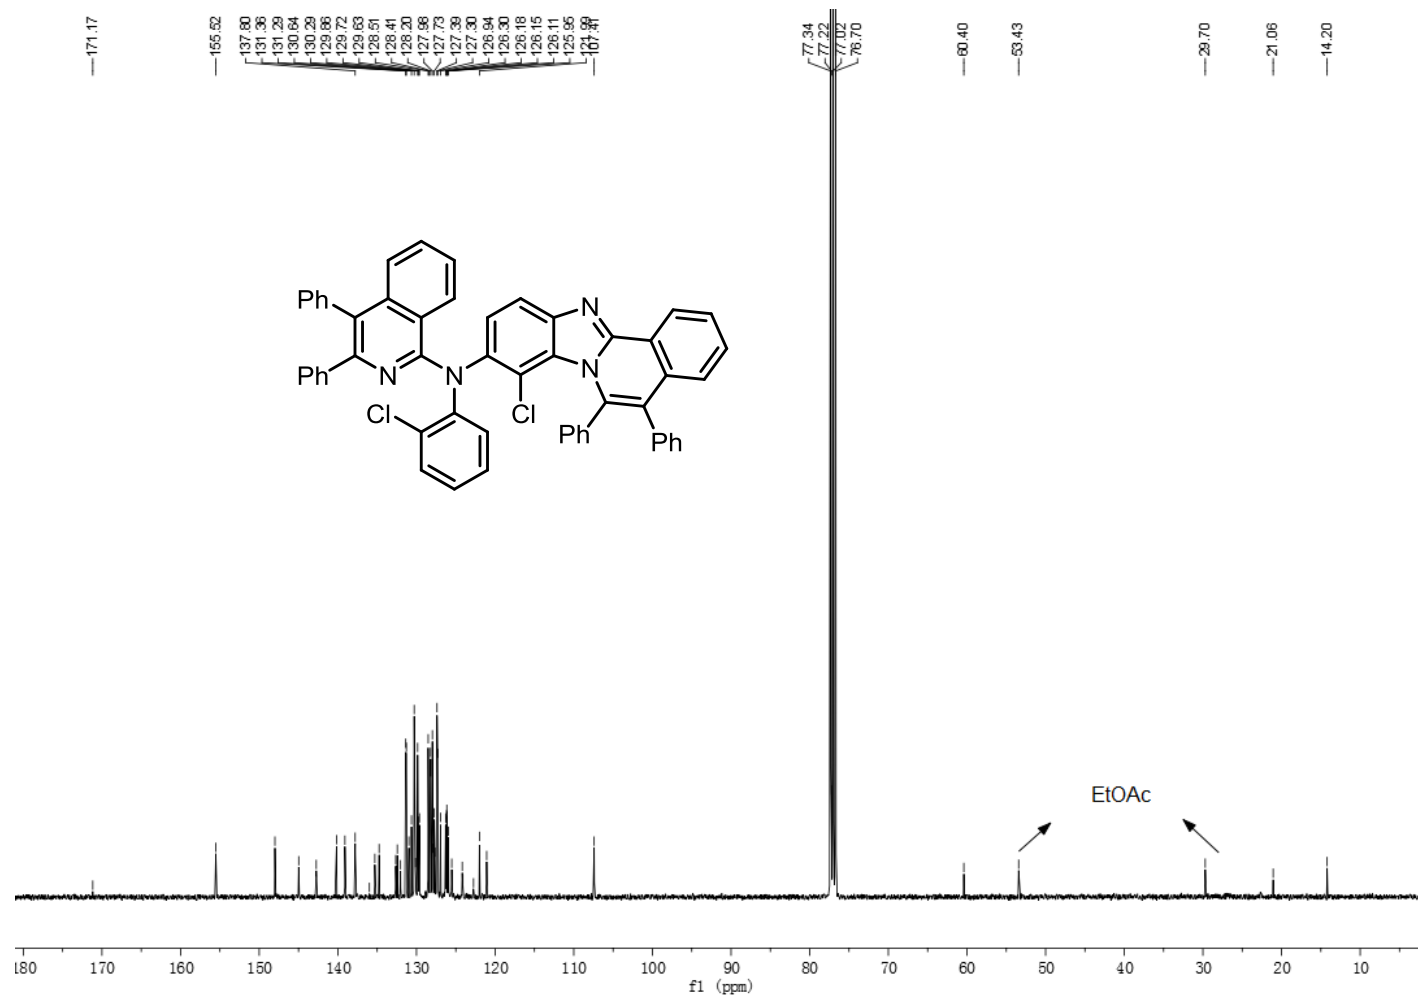

Compound 3la

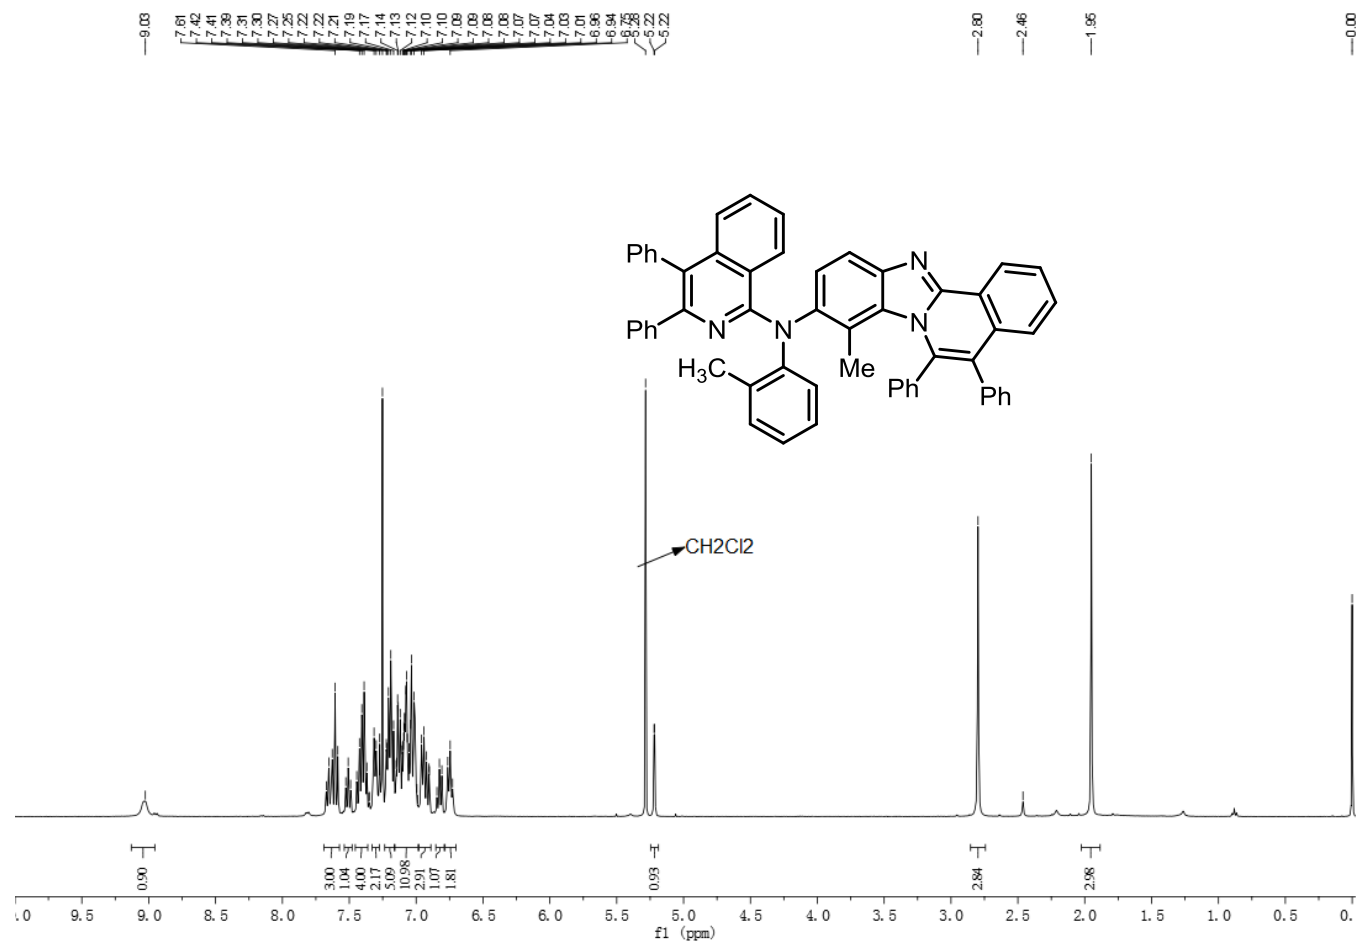

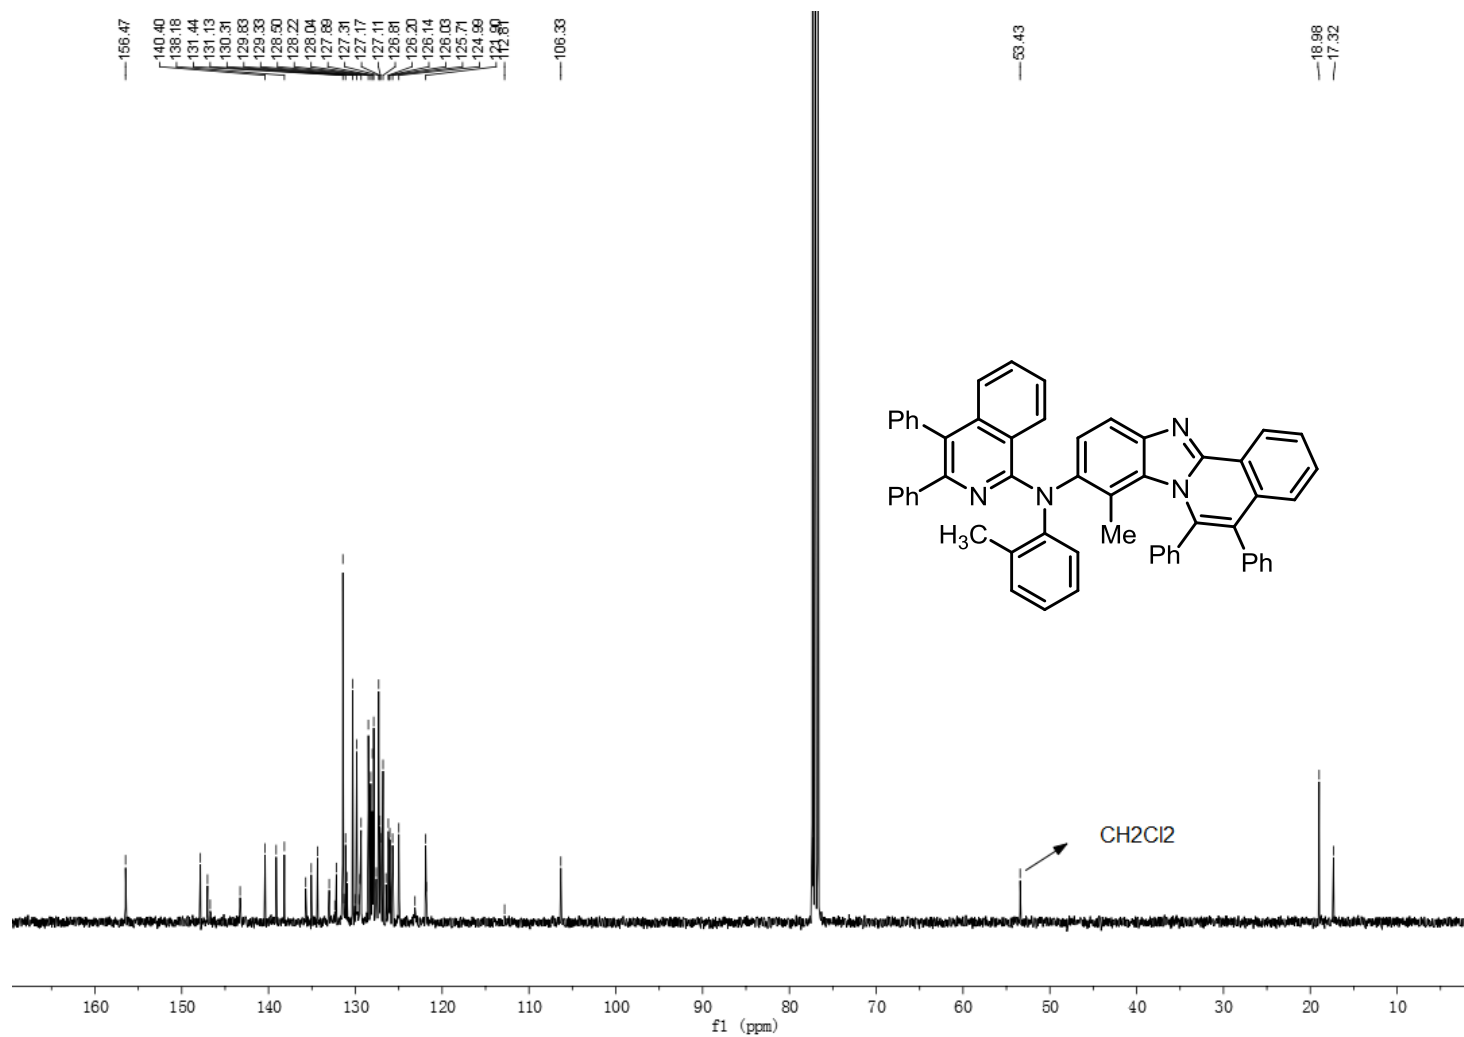



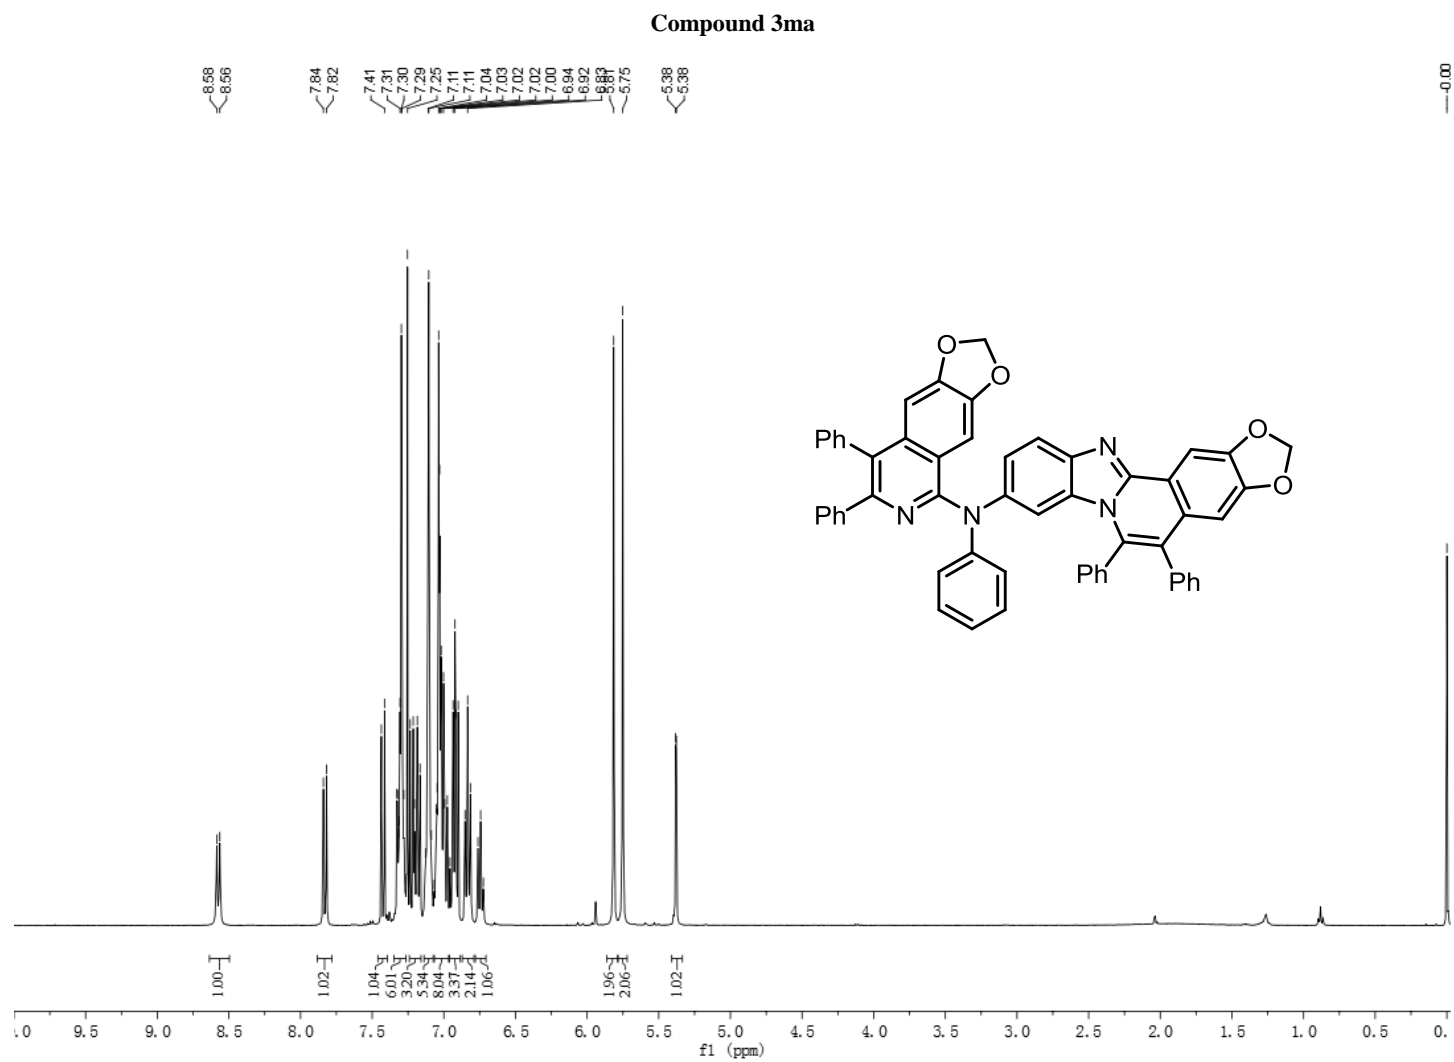

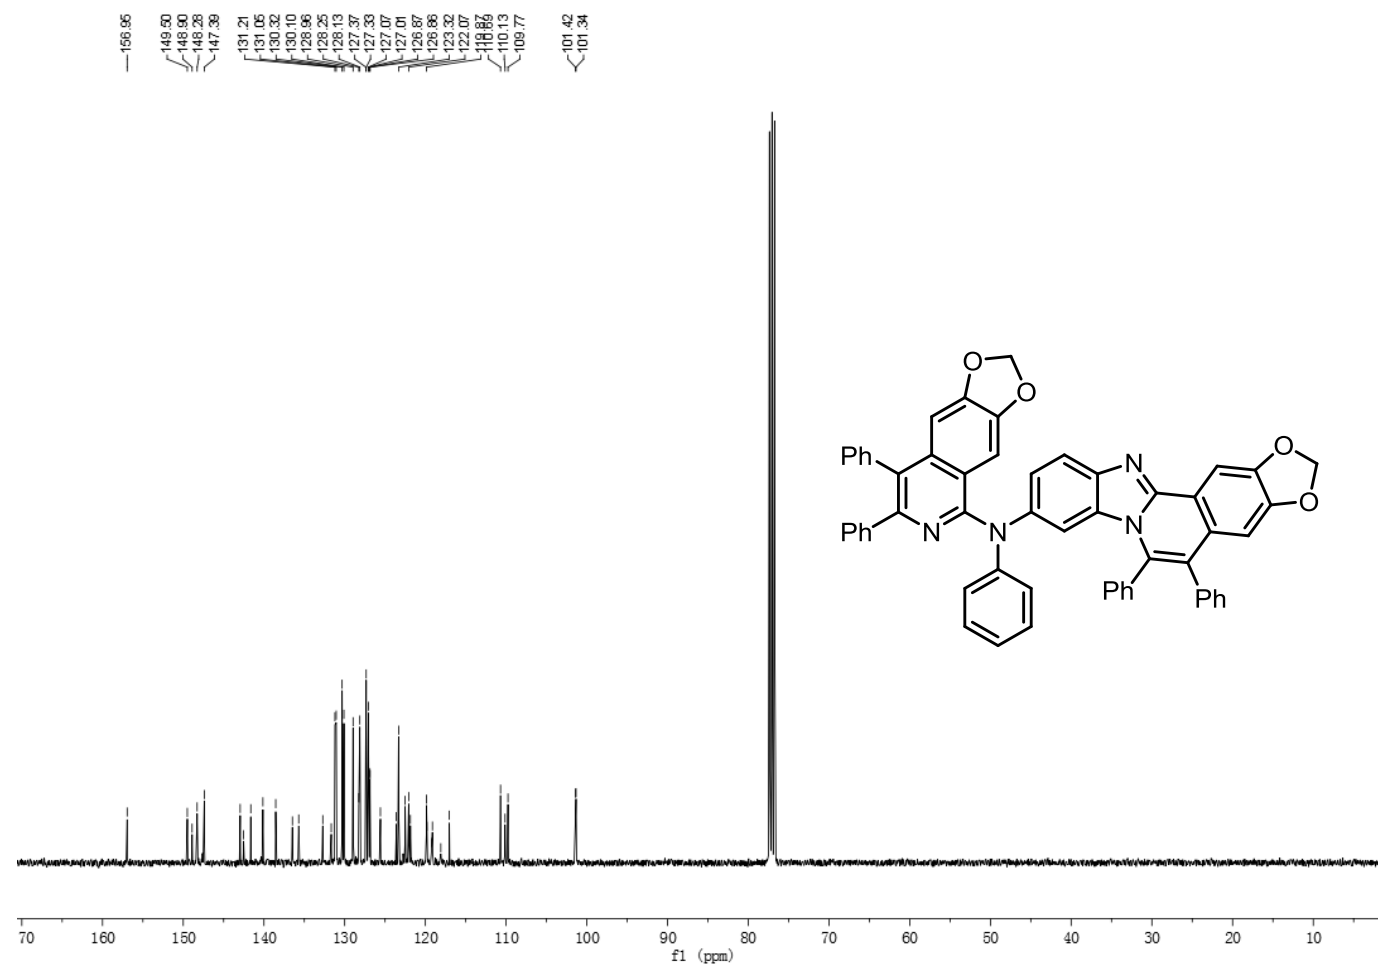

Compound 3na

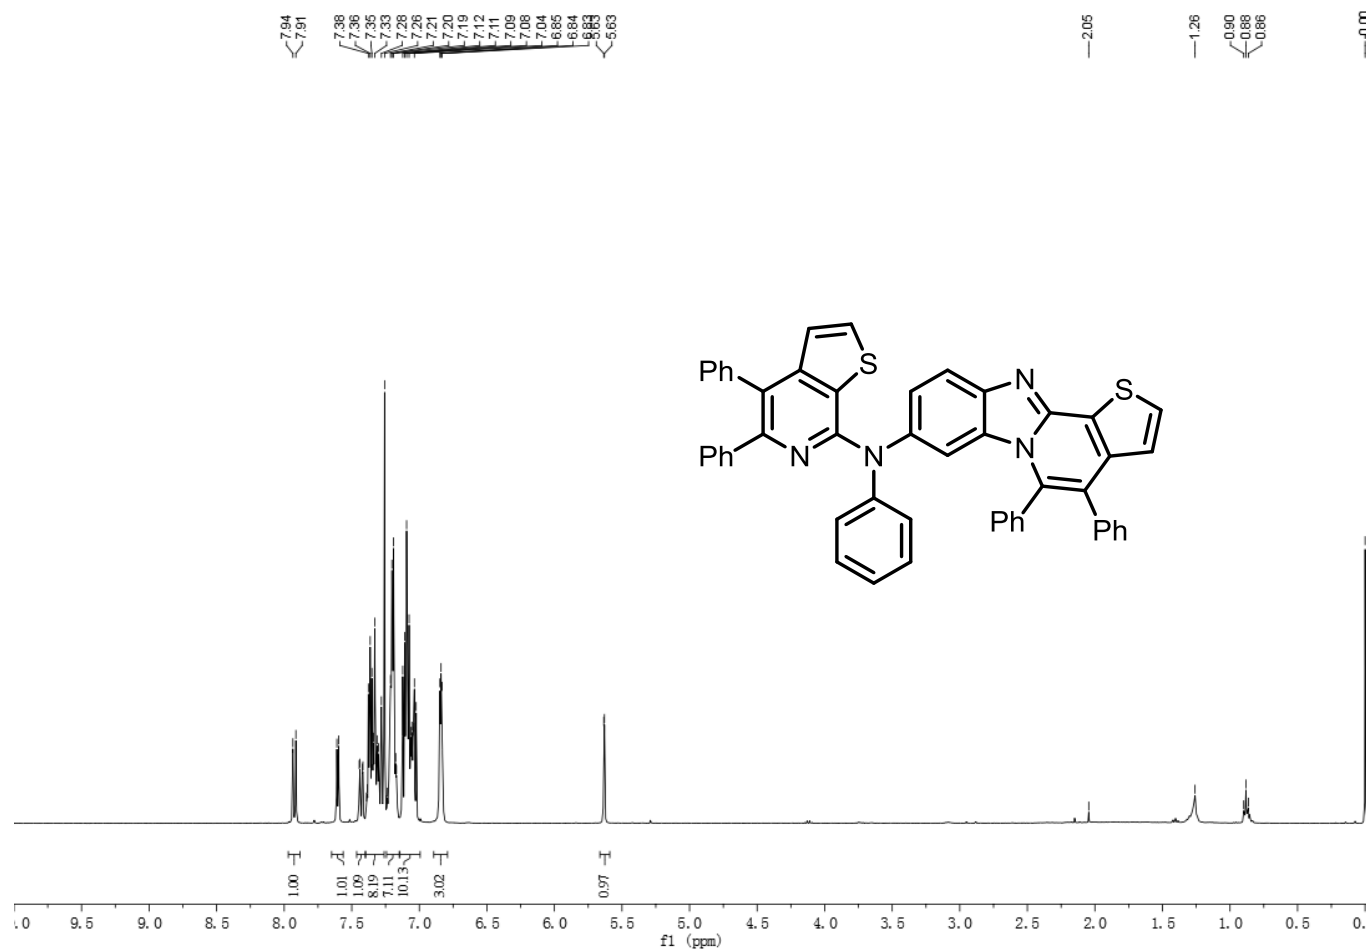

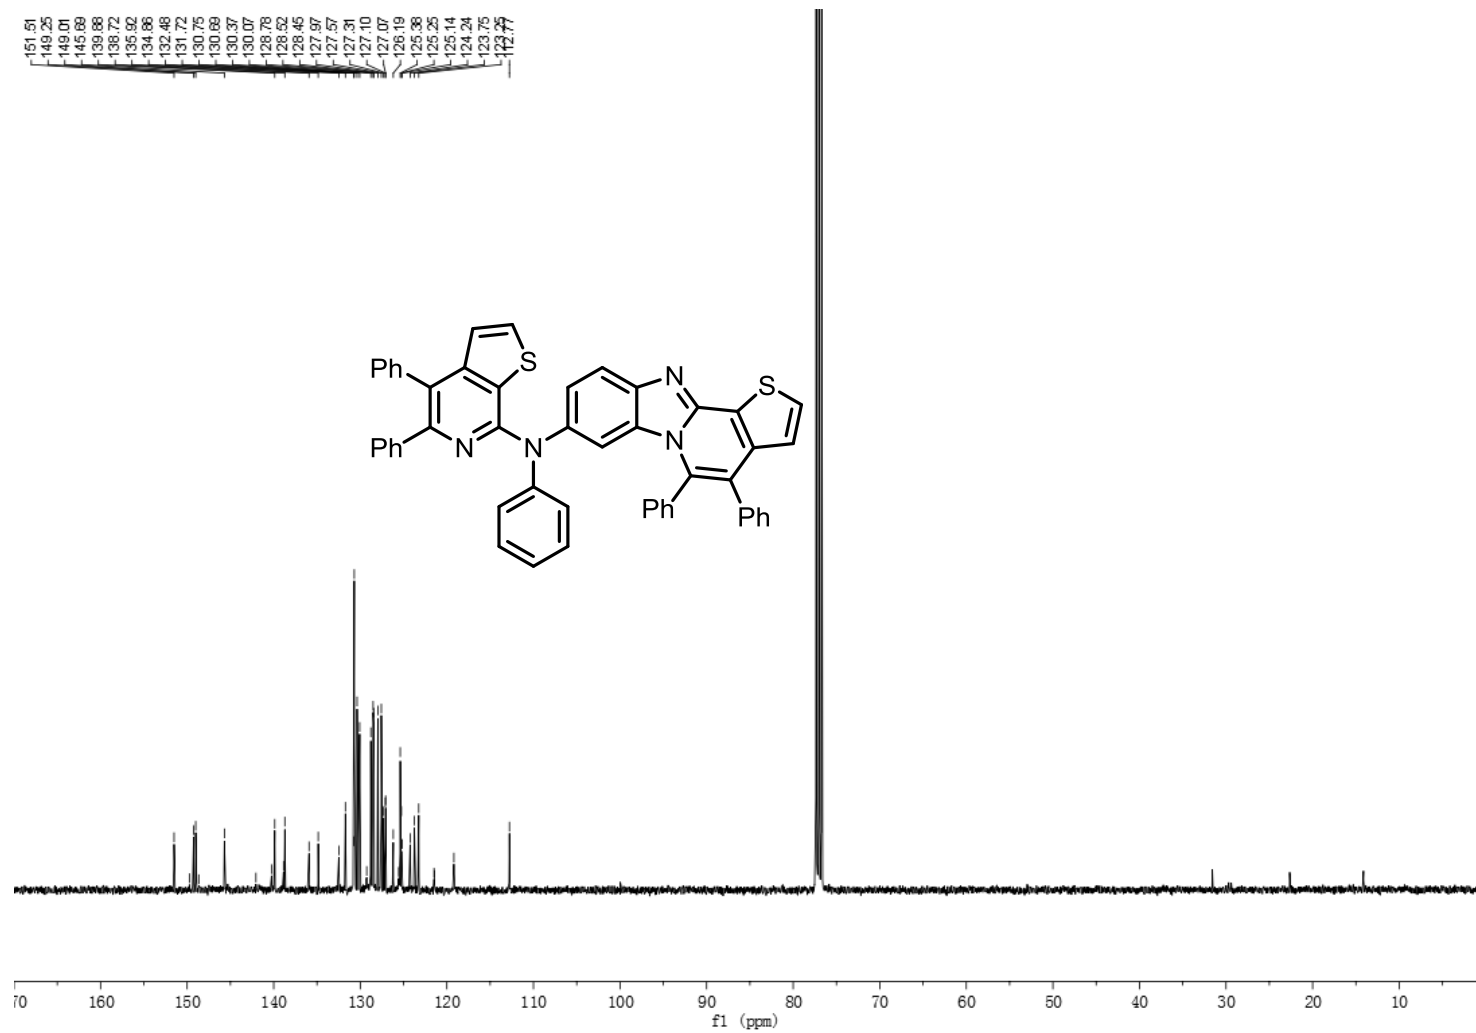

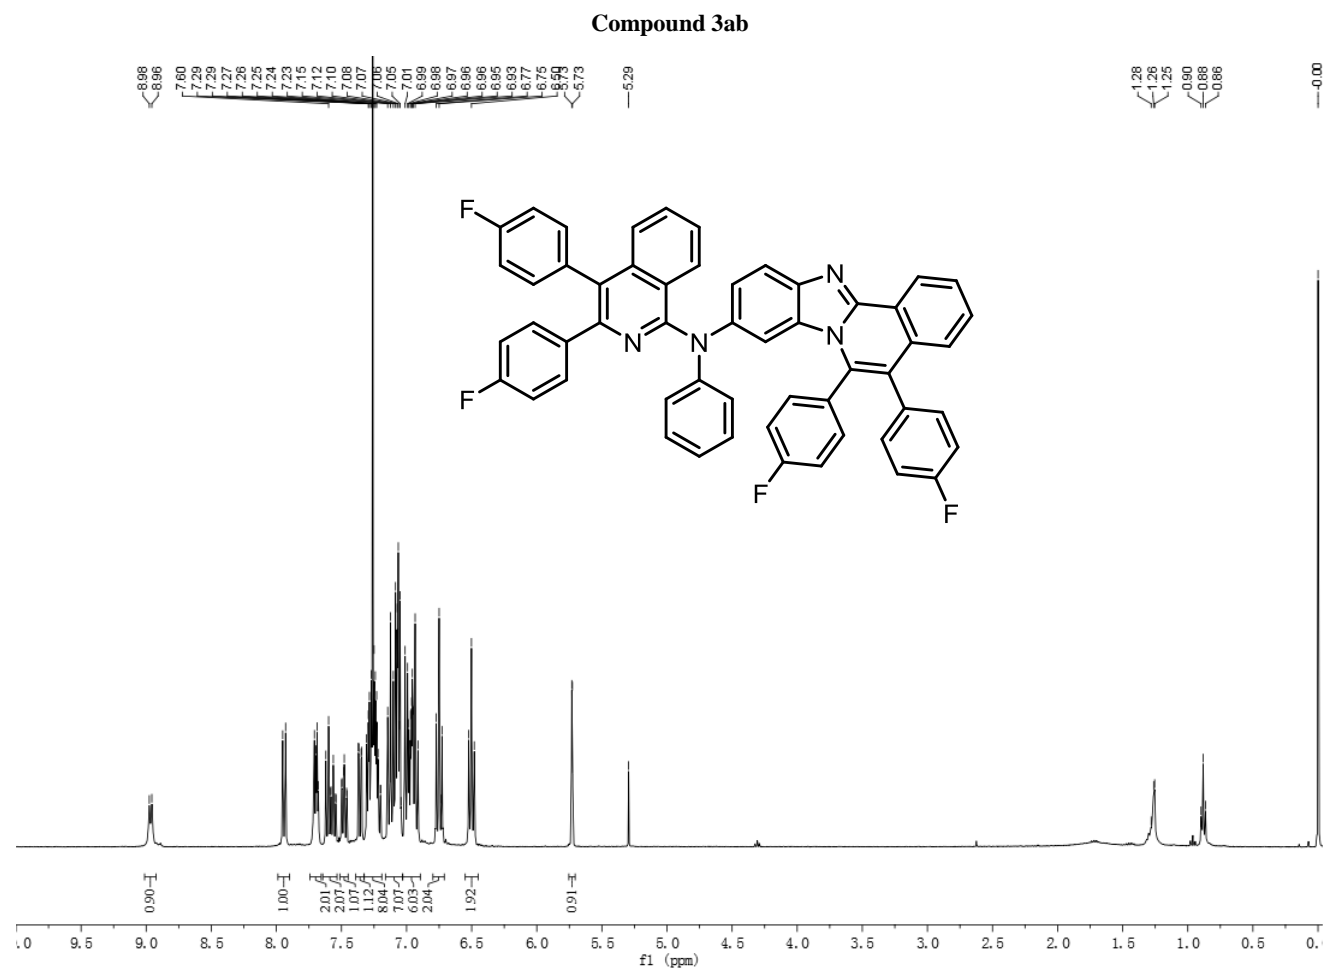

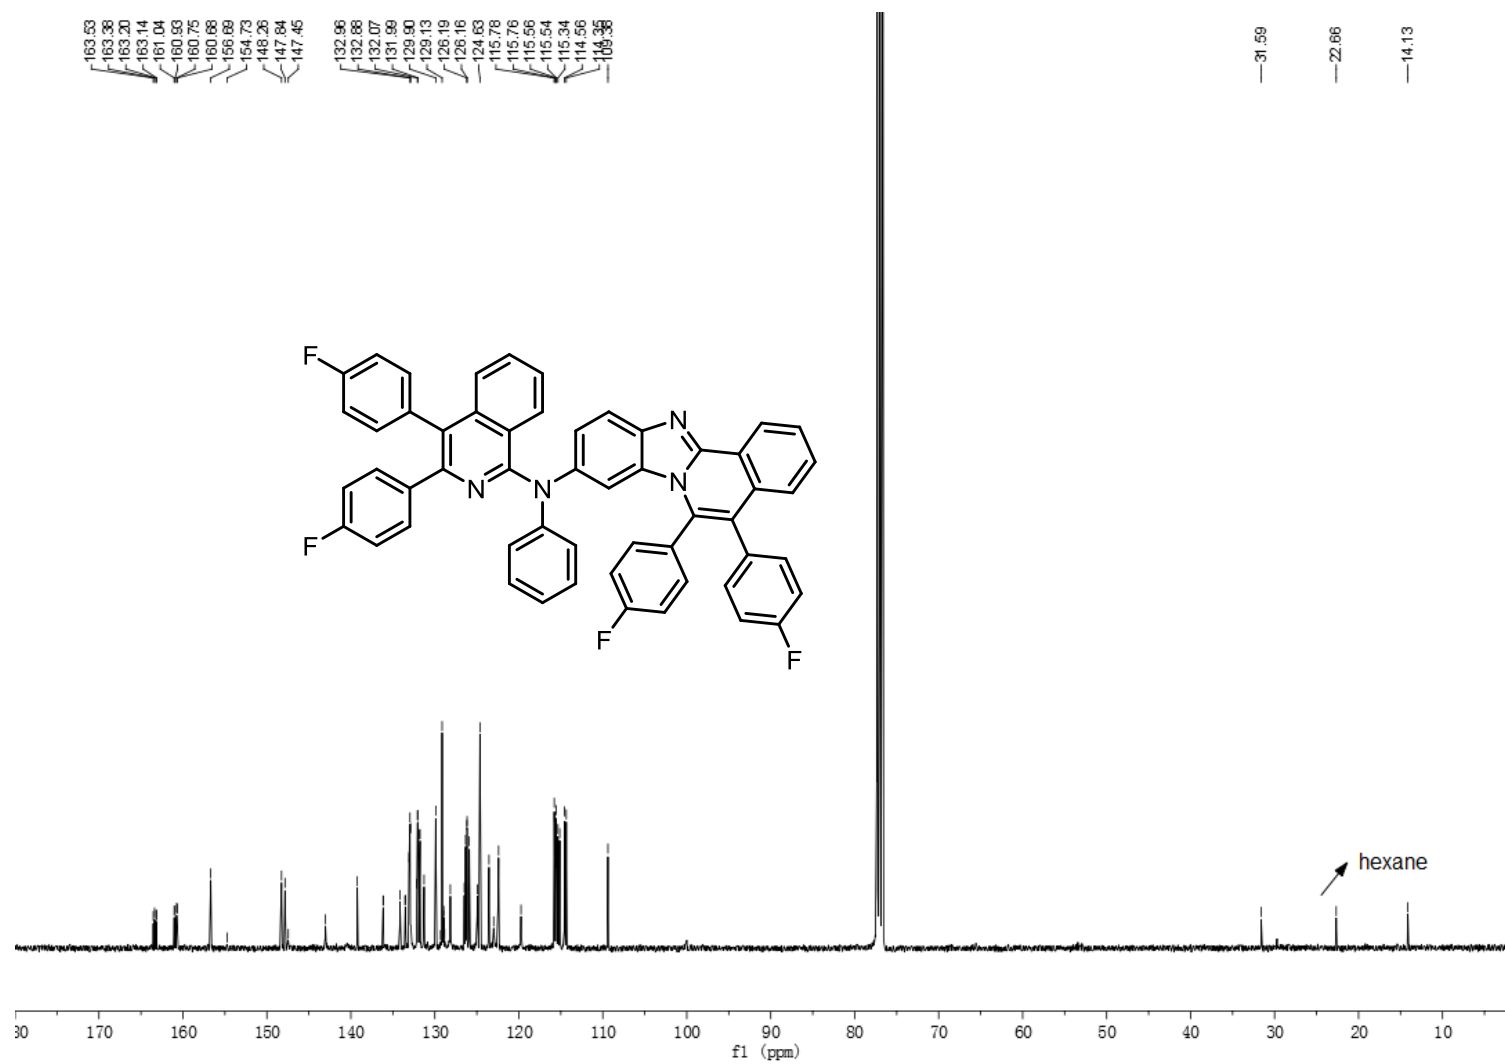

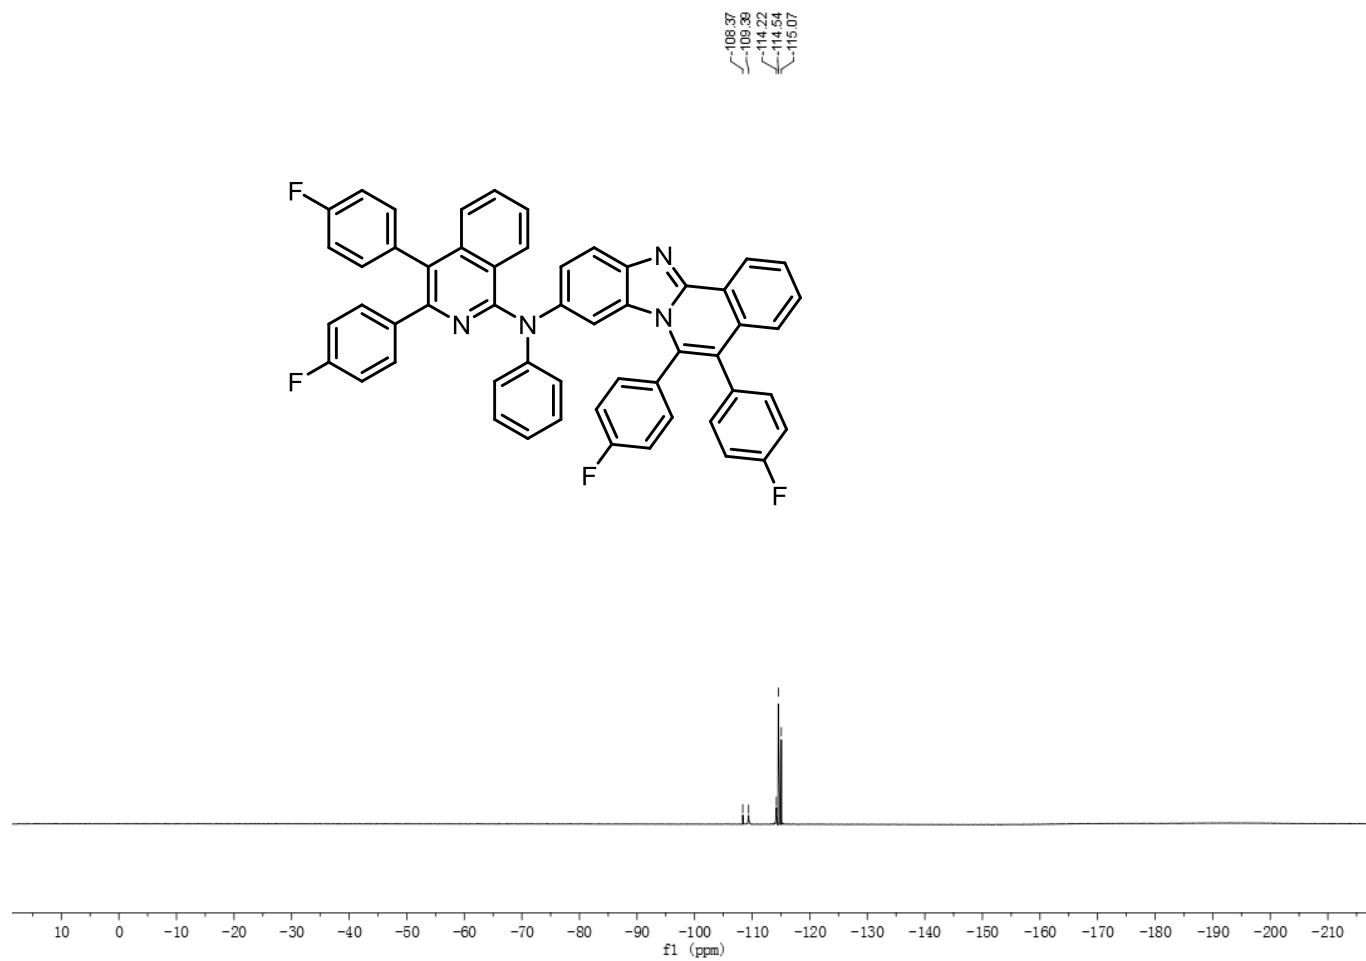

Compound 3ac

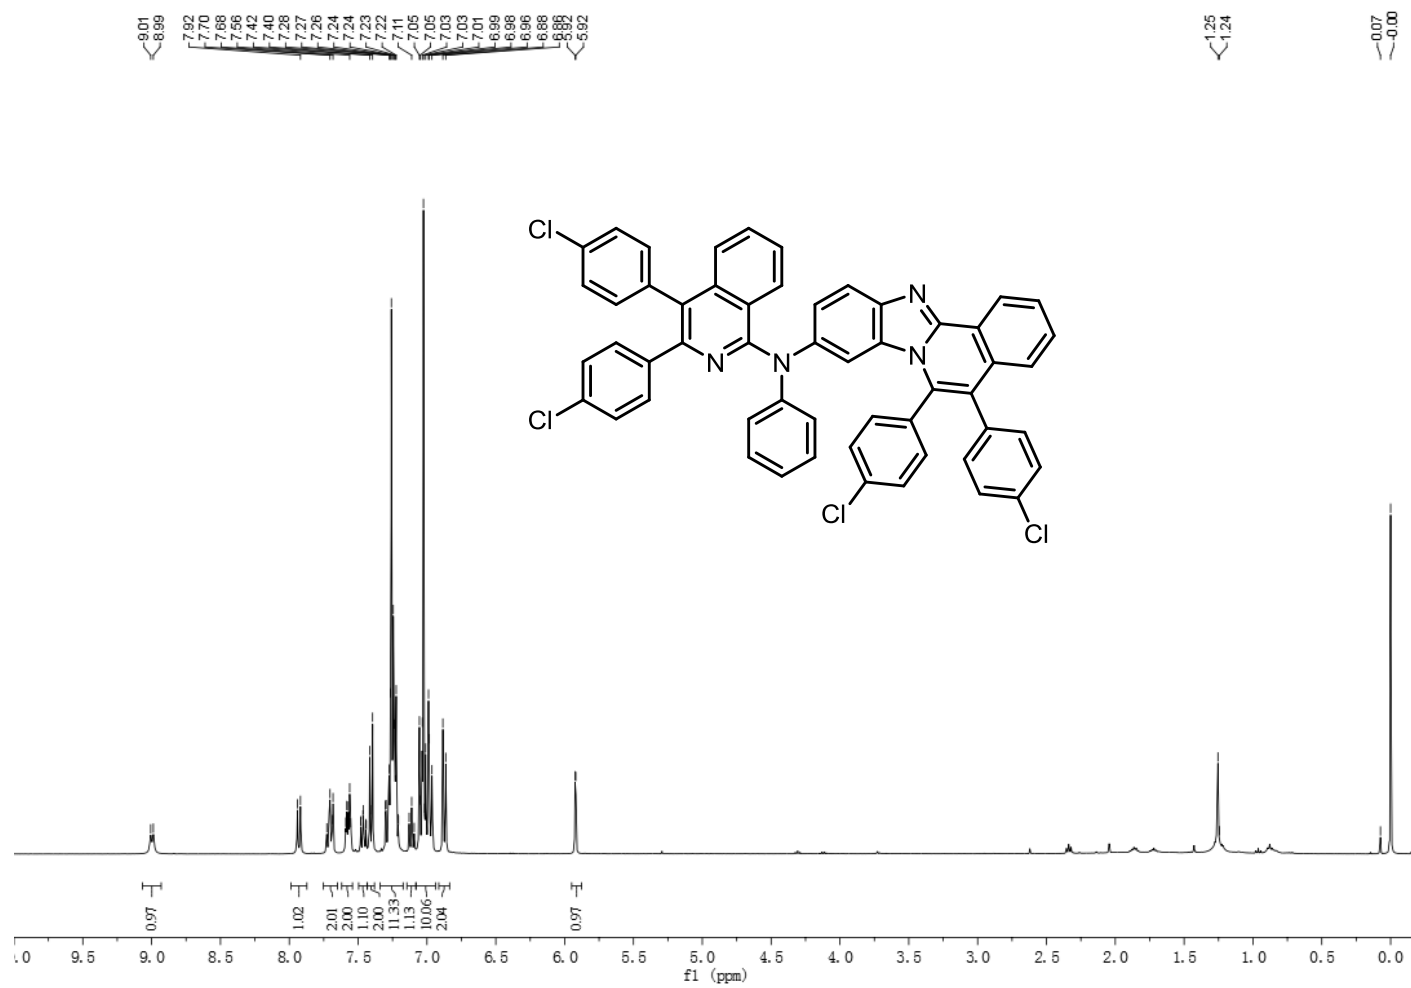



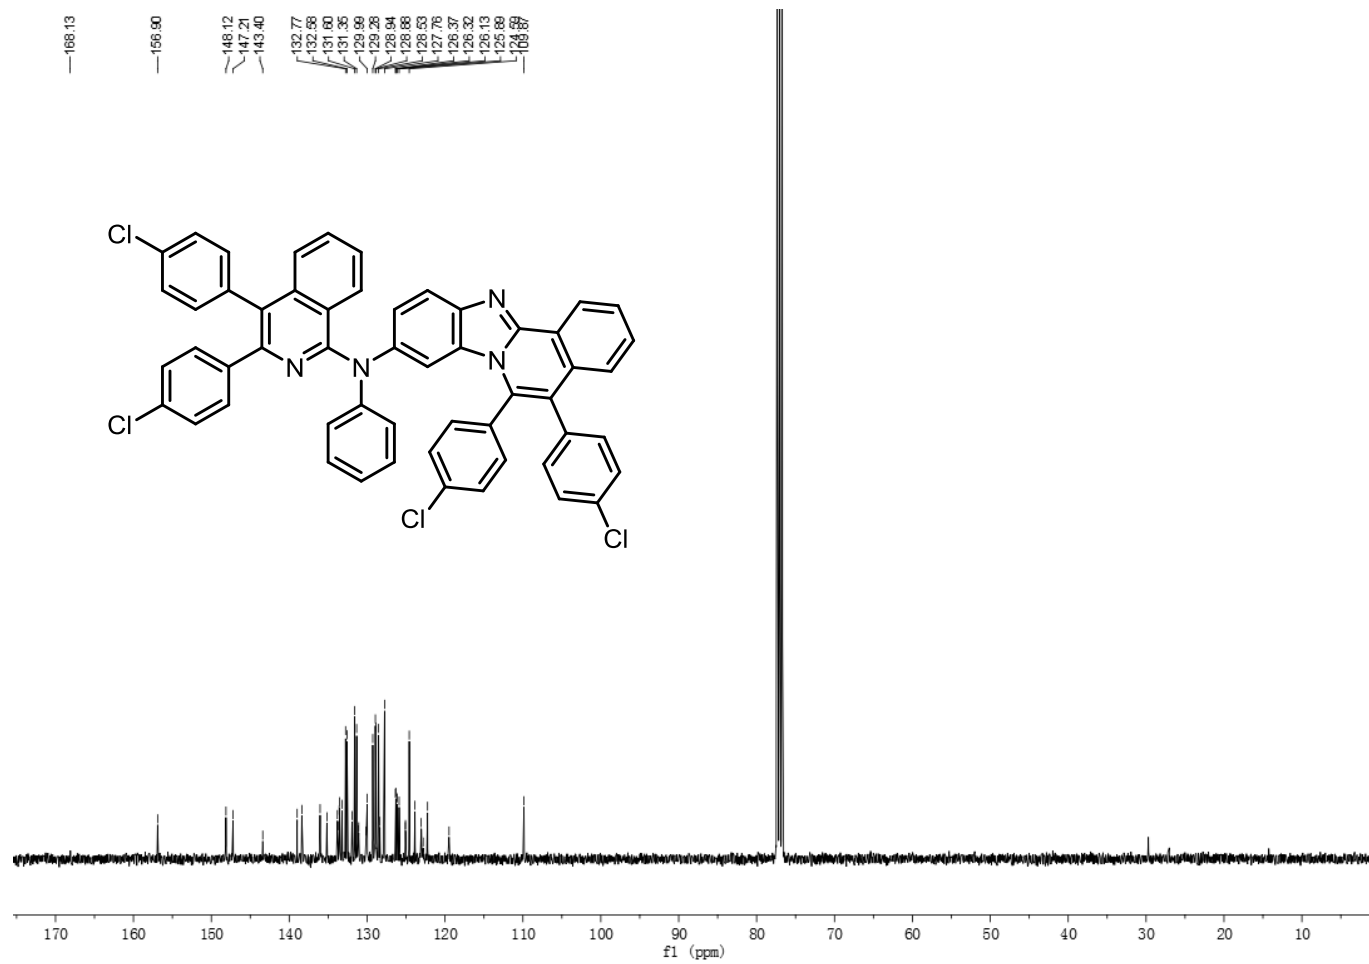

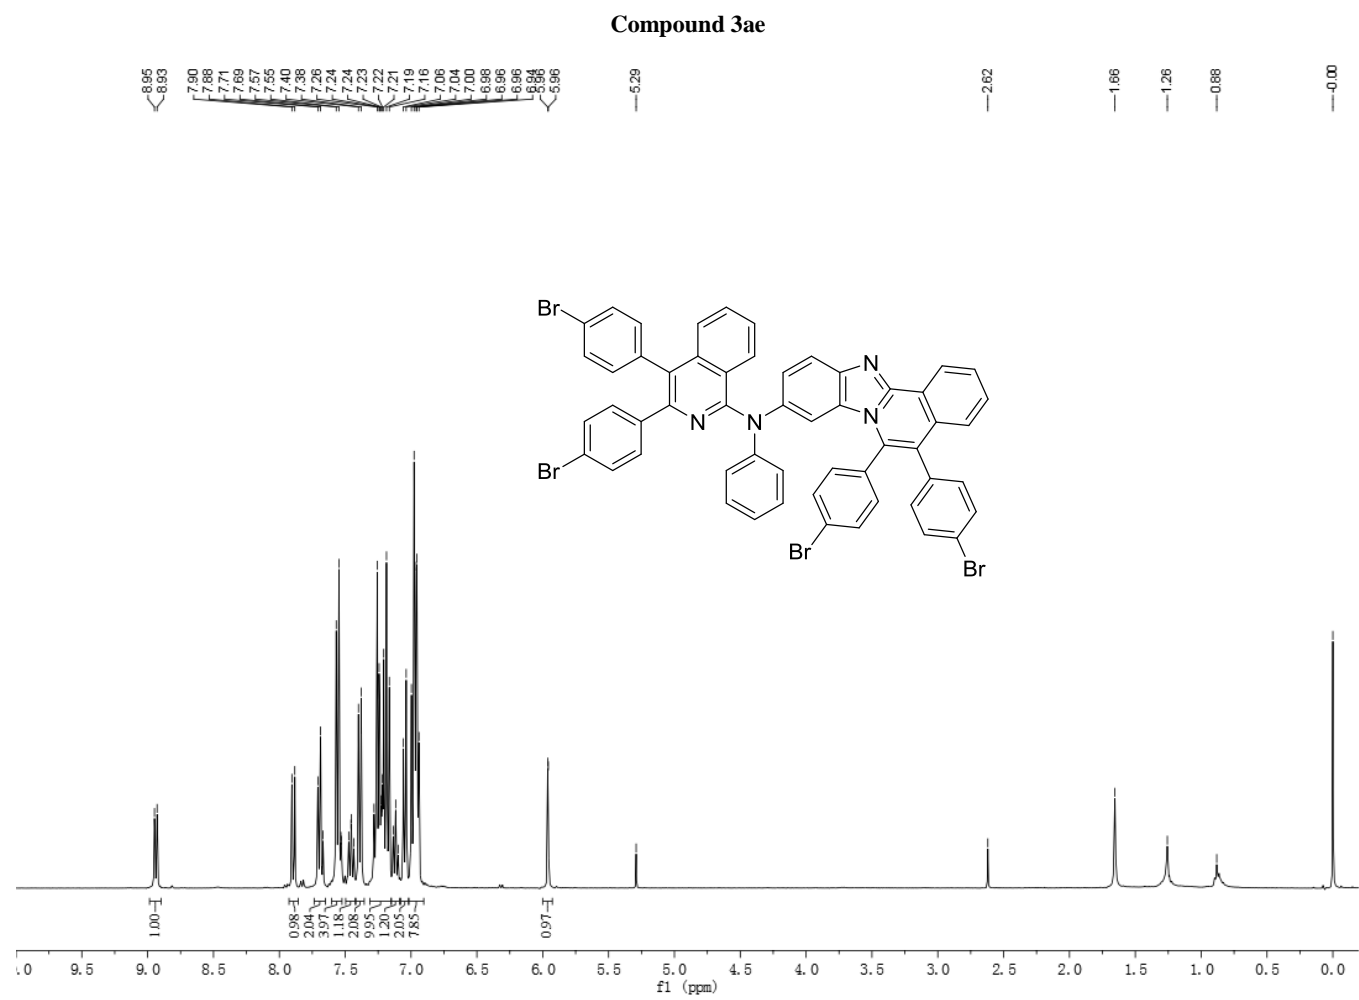



Compound 3ae

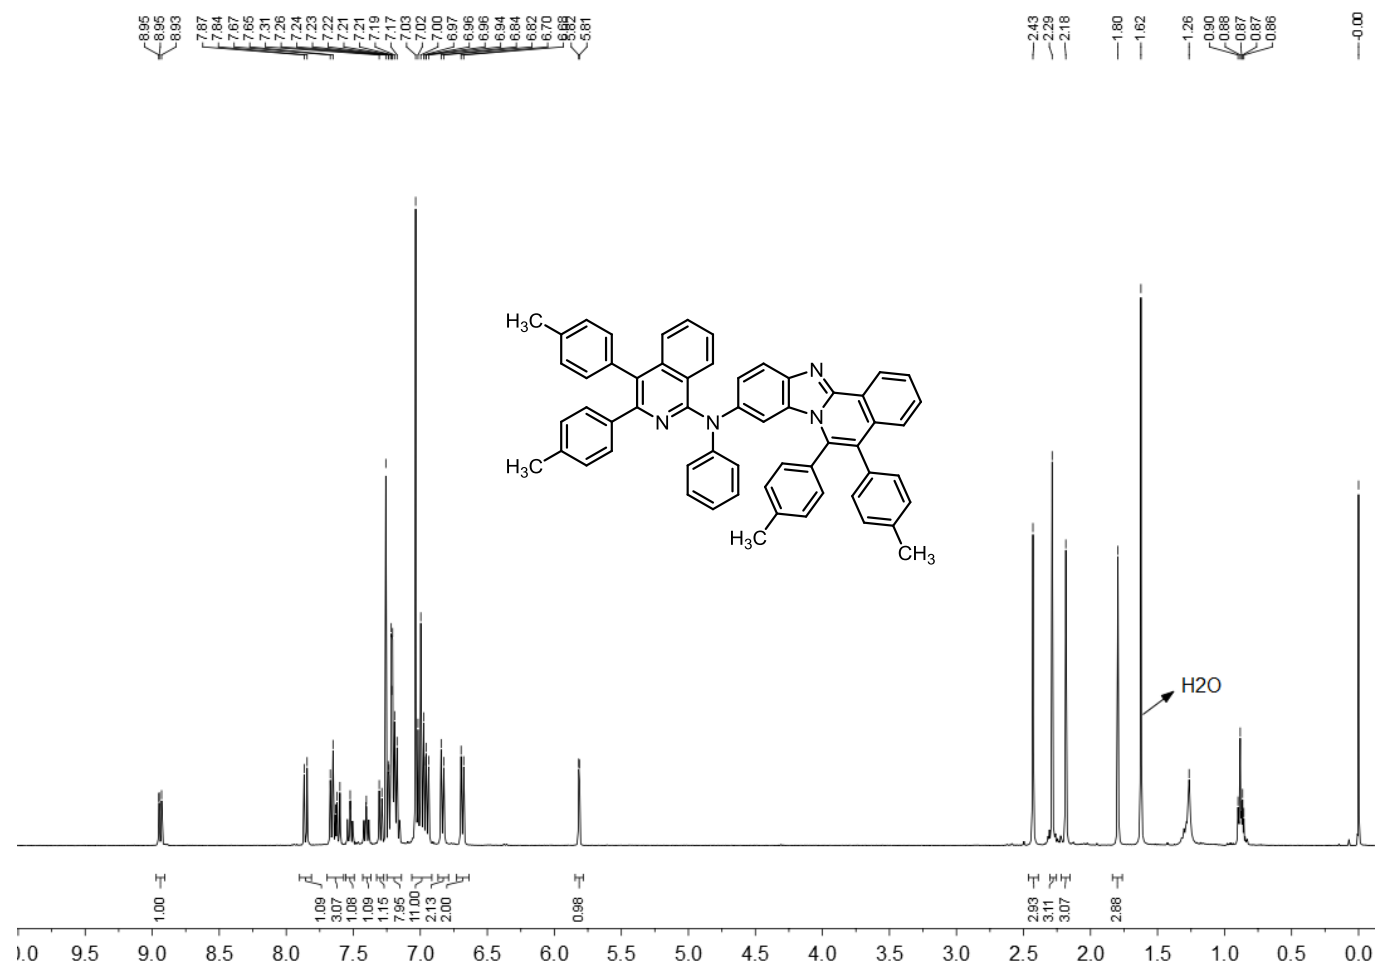

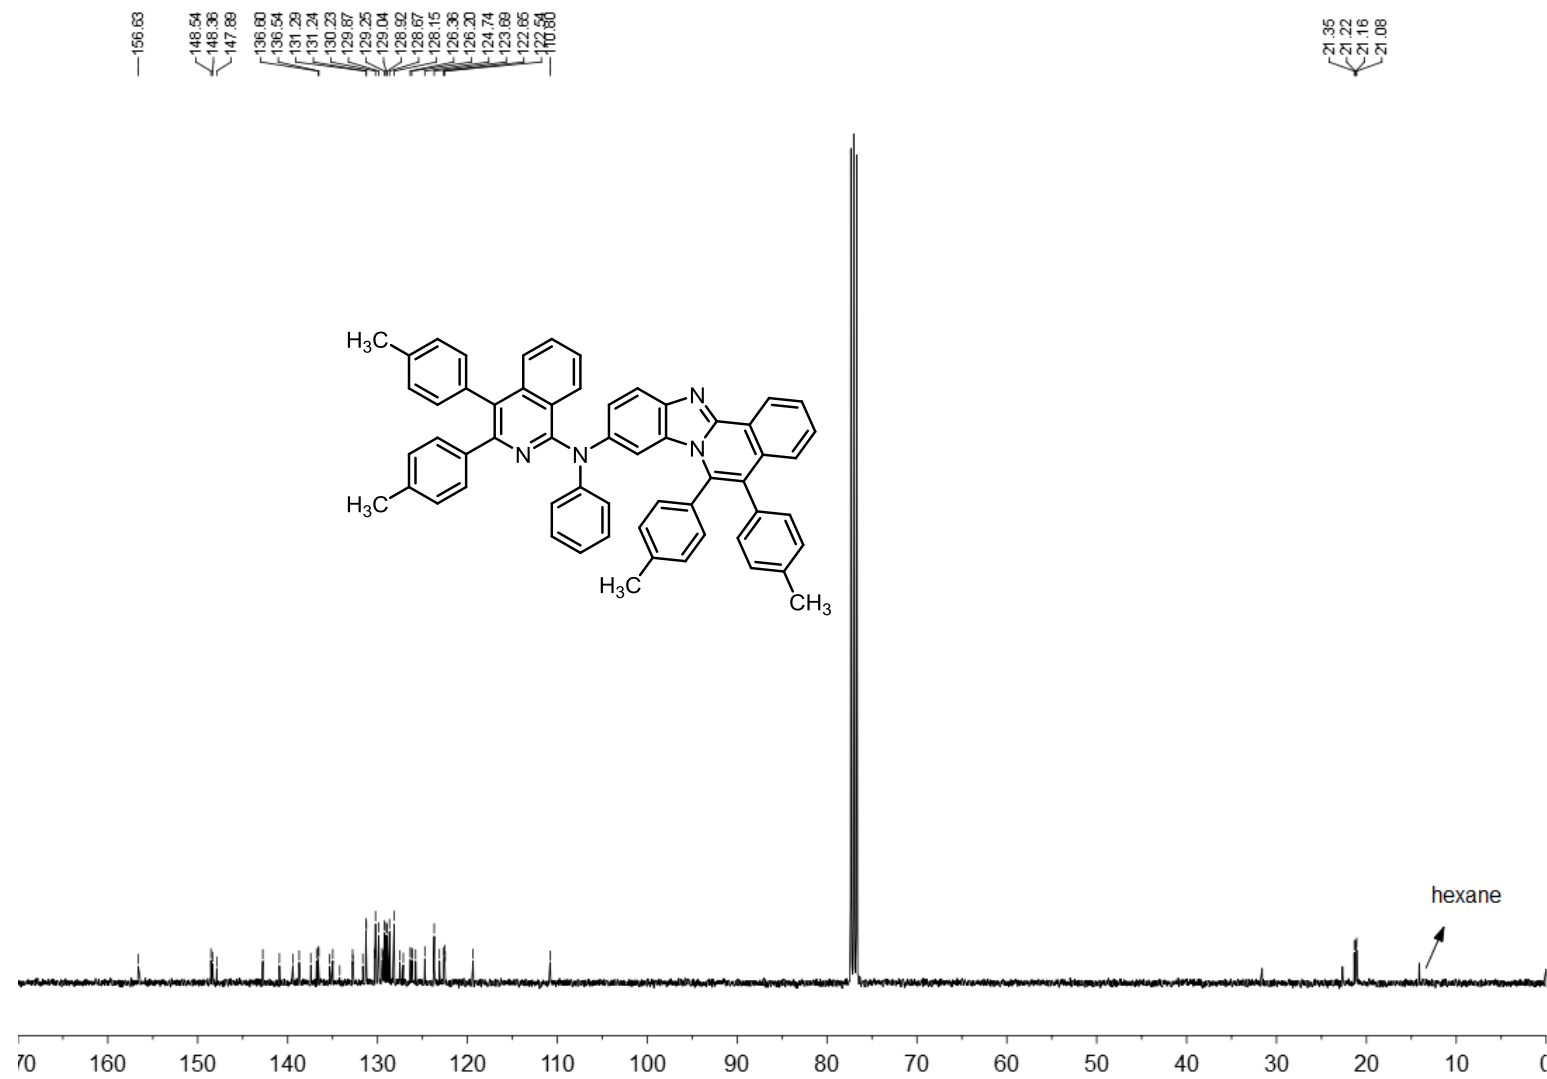

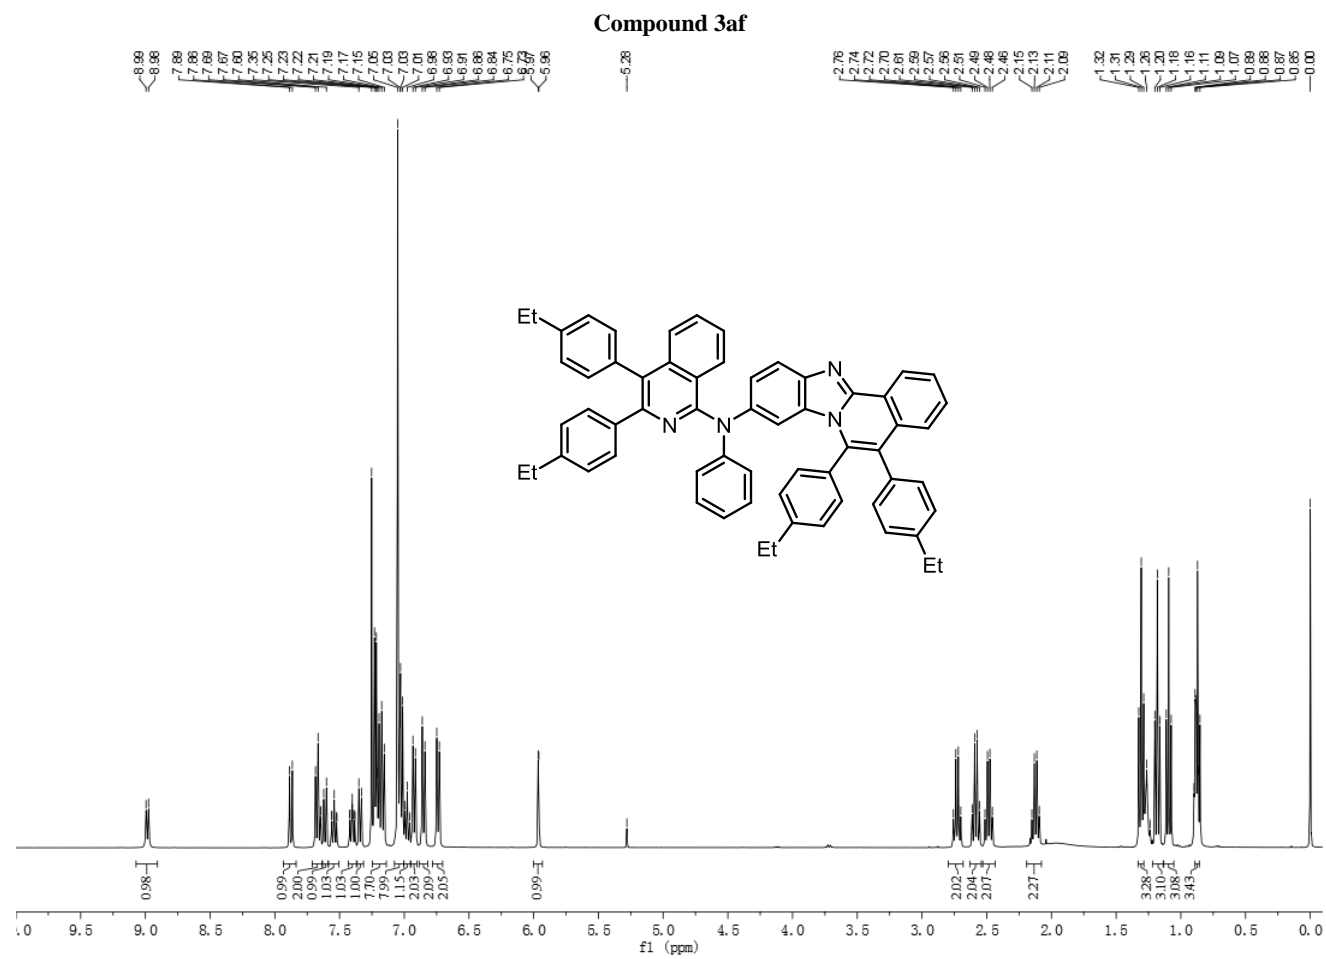



Compound 3ag

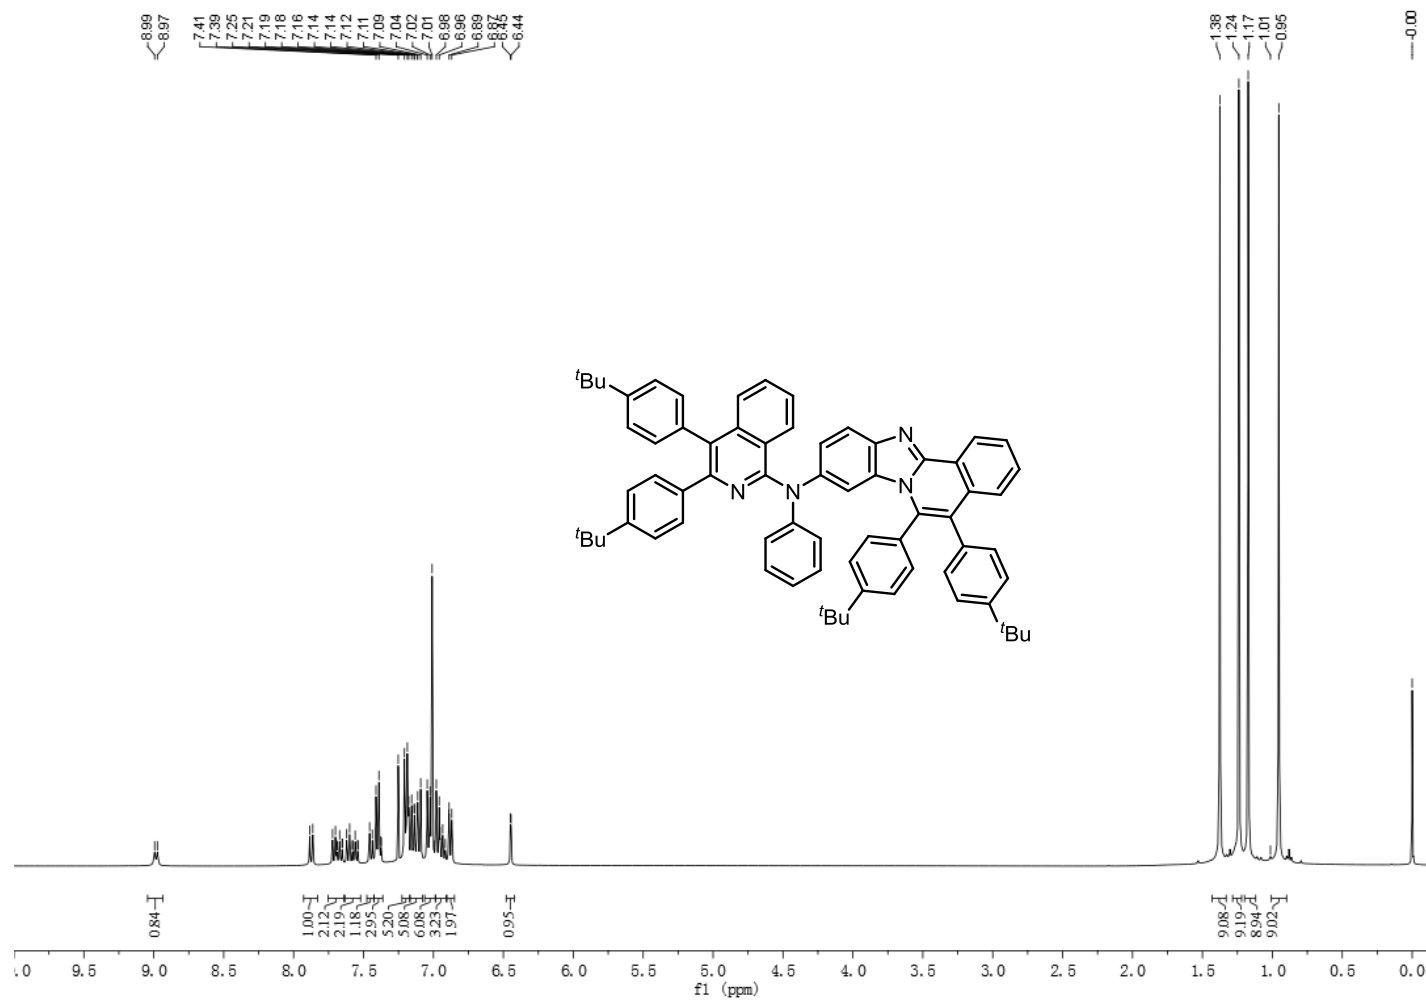



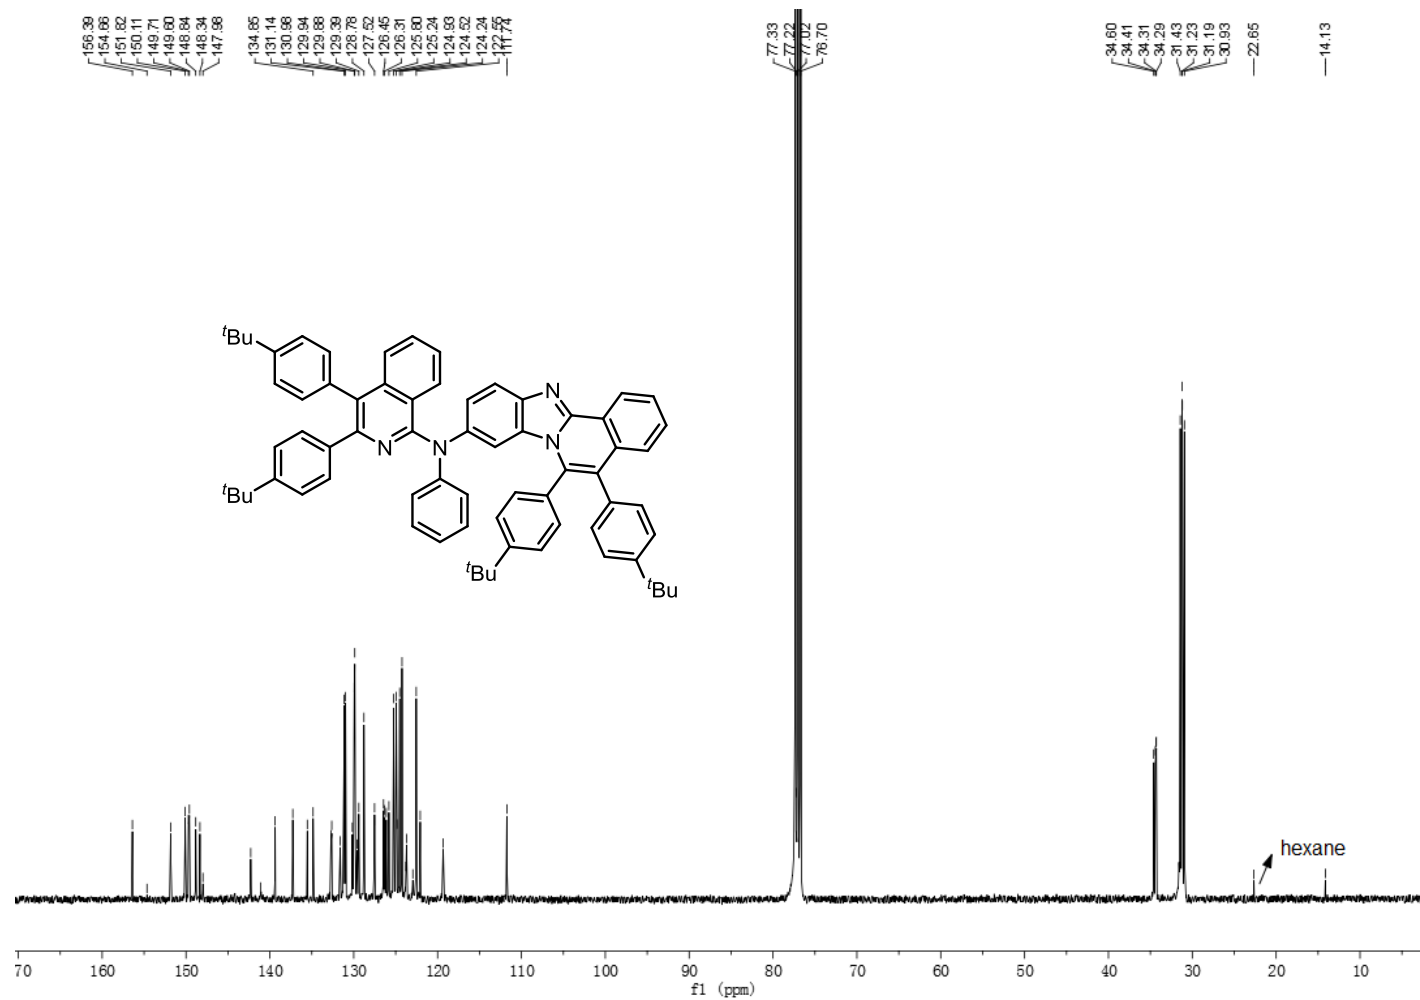

Compound 3ah

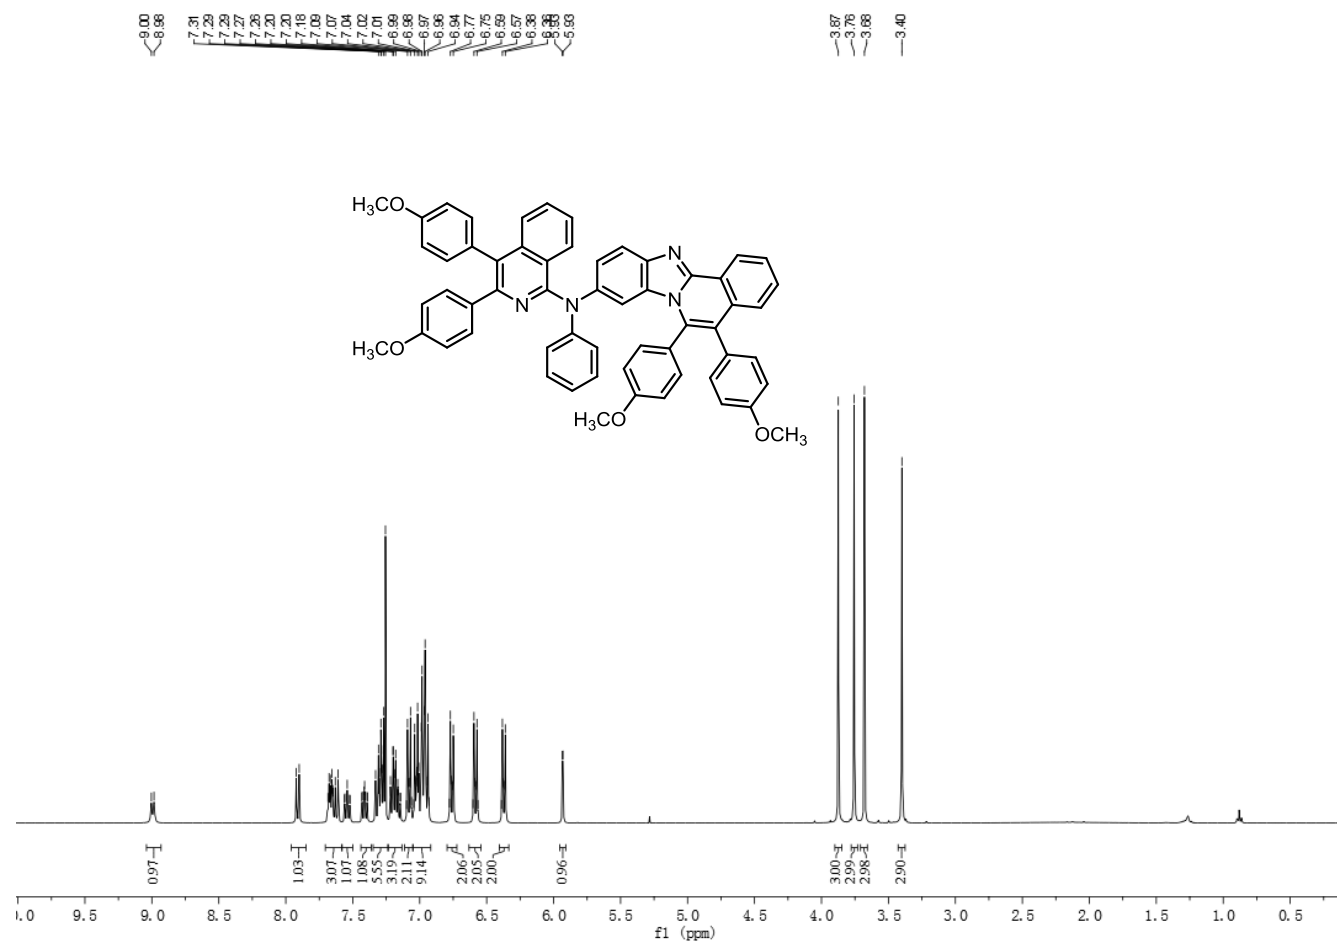

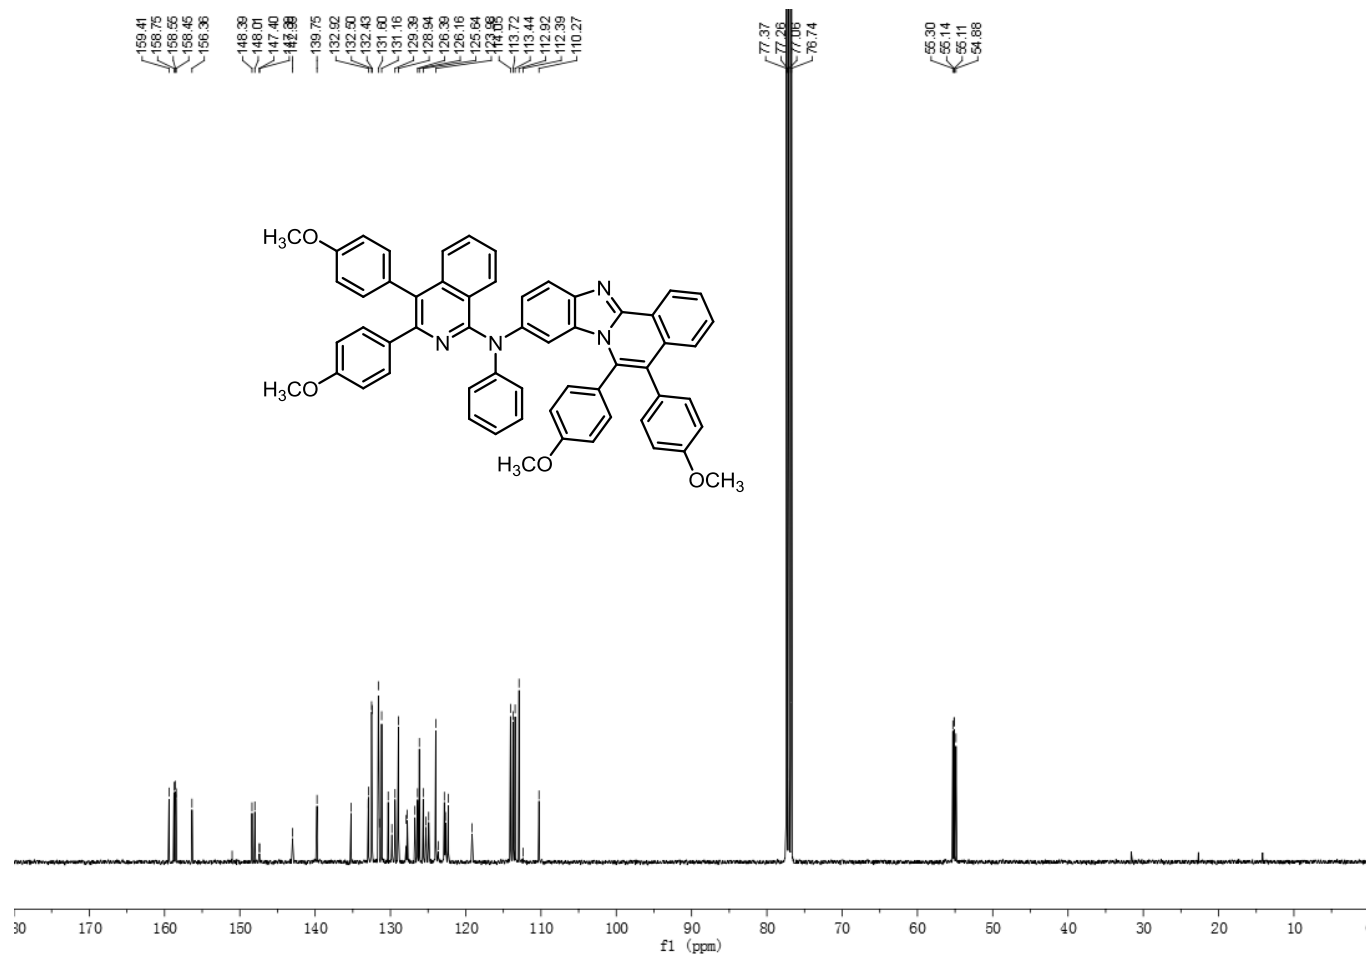

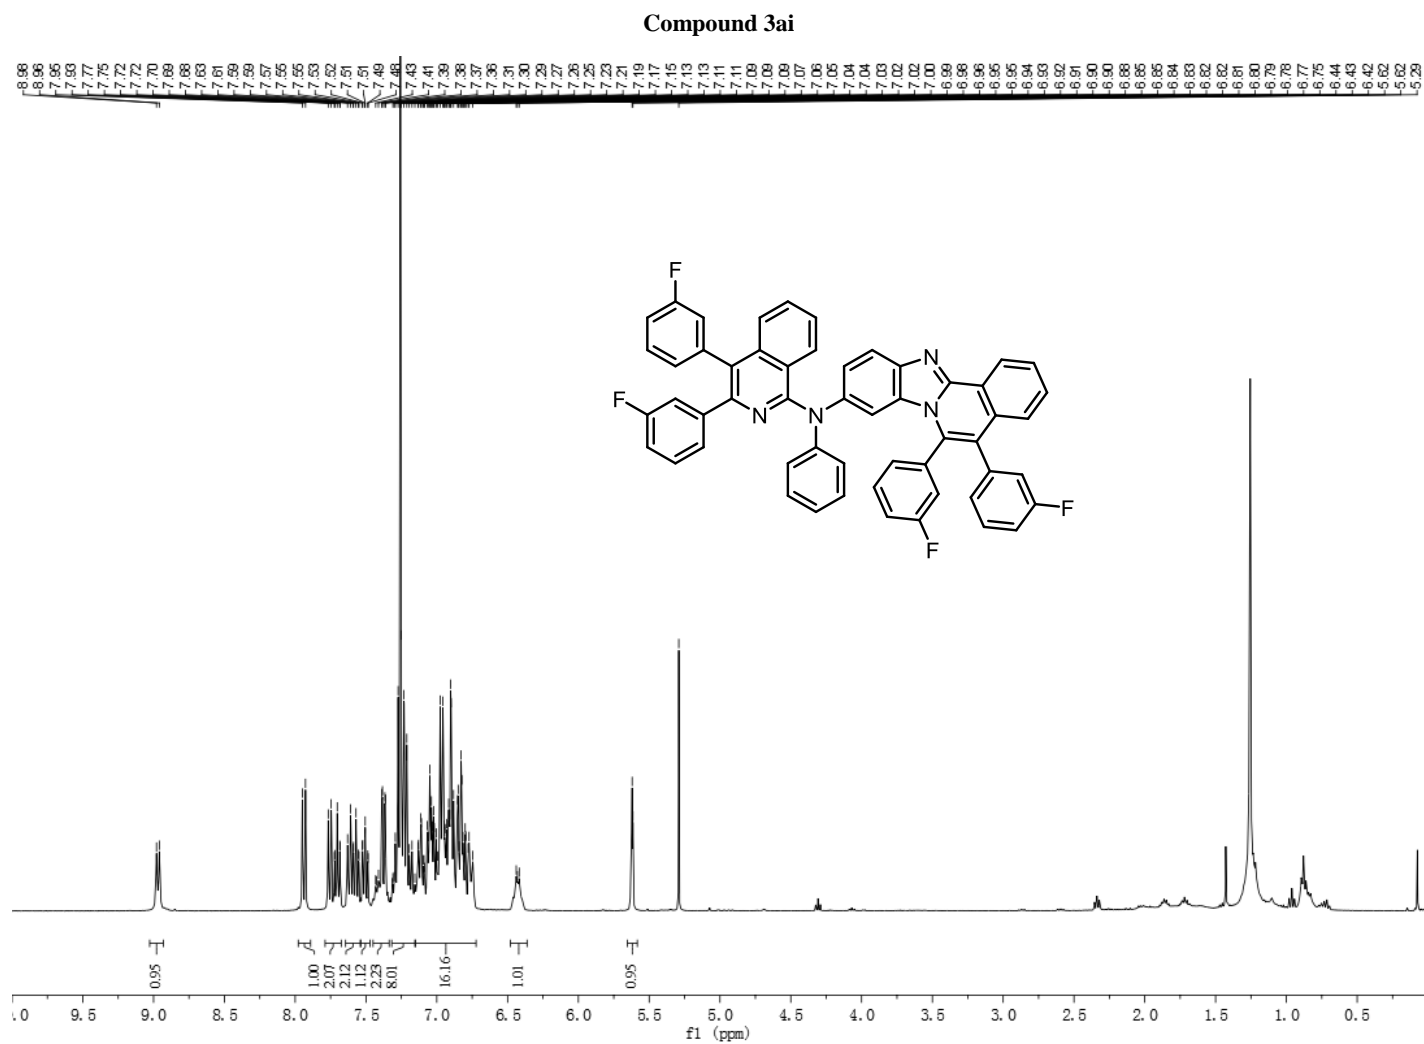

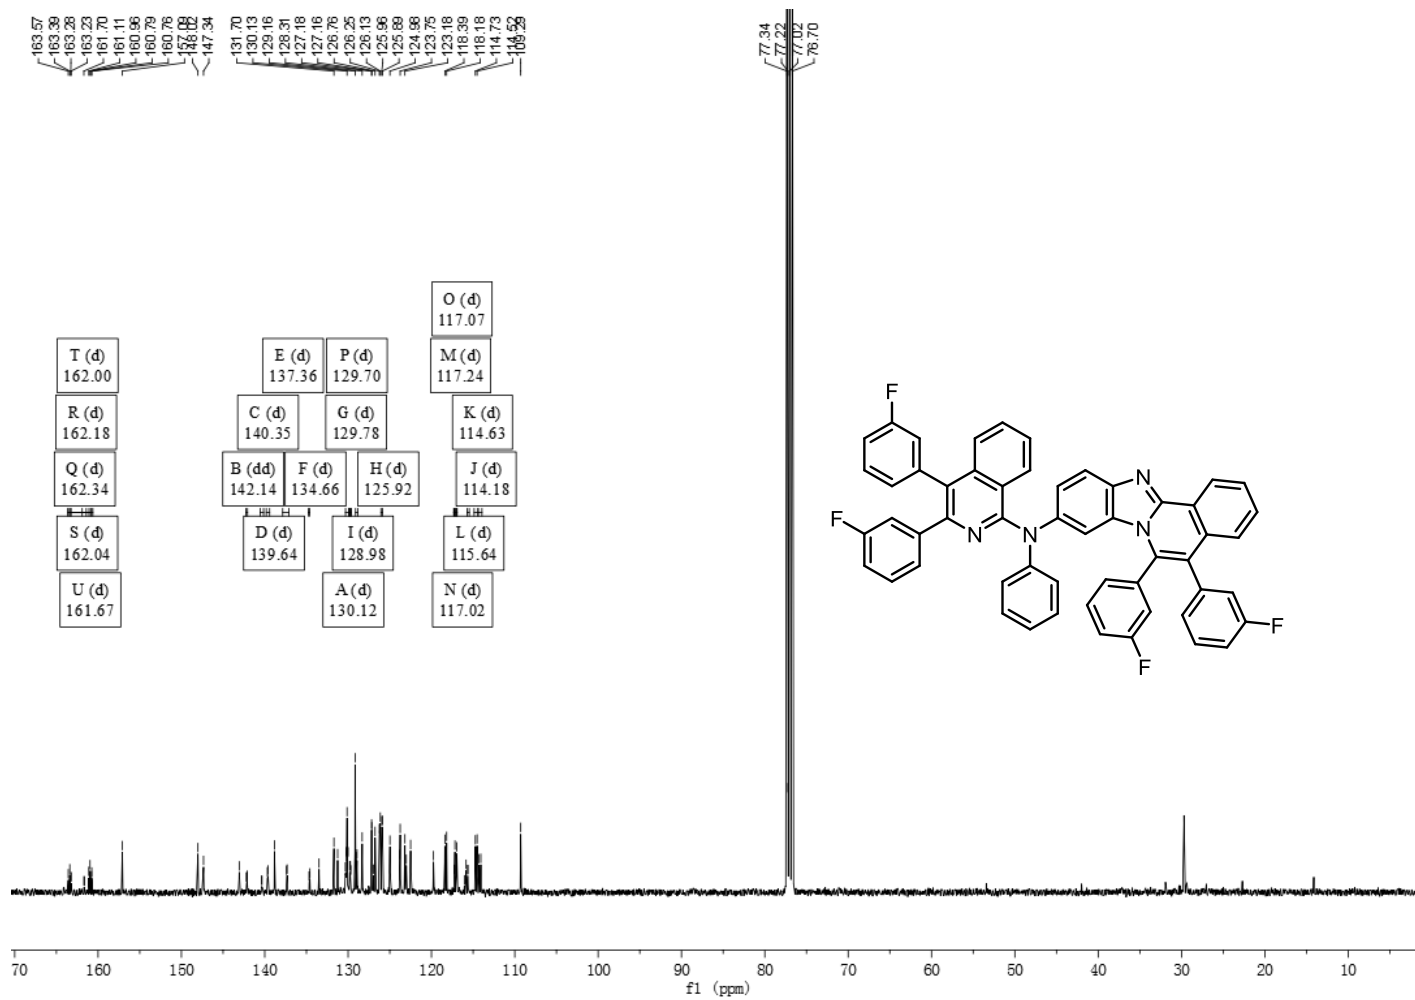

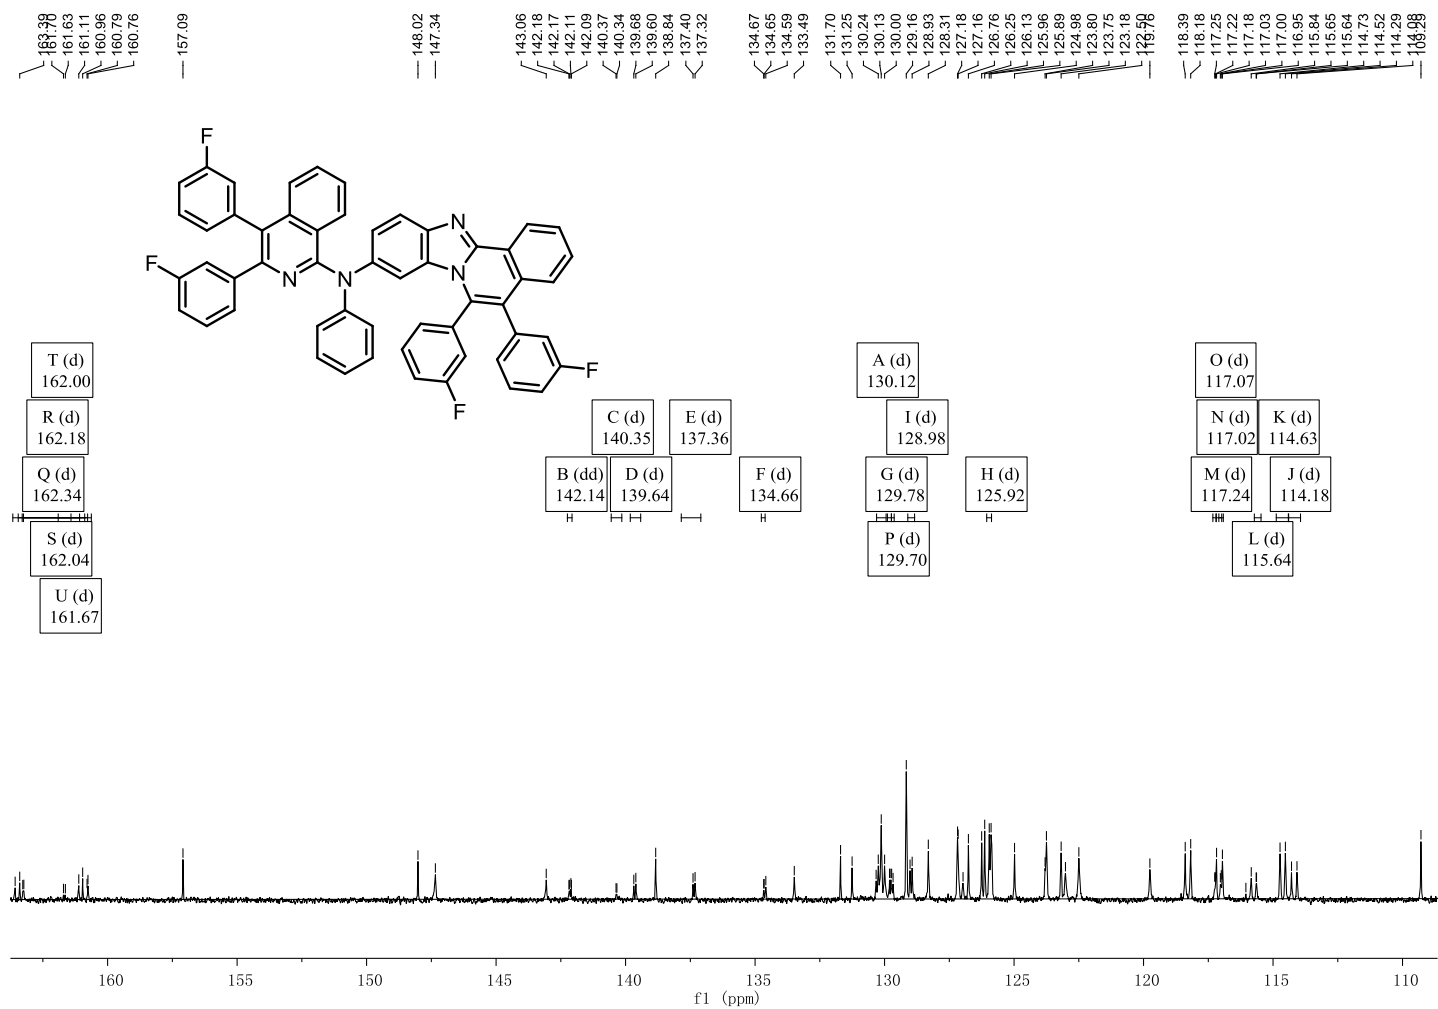

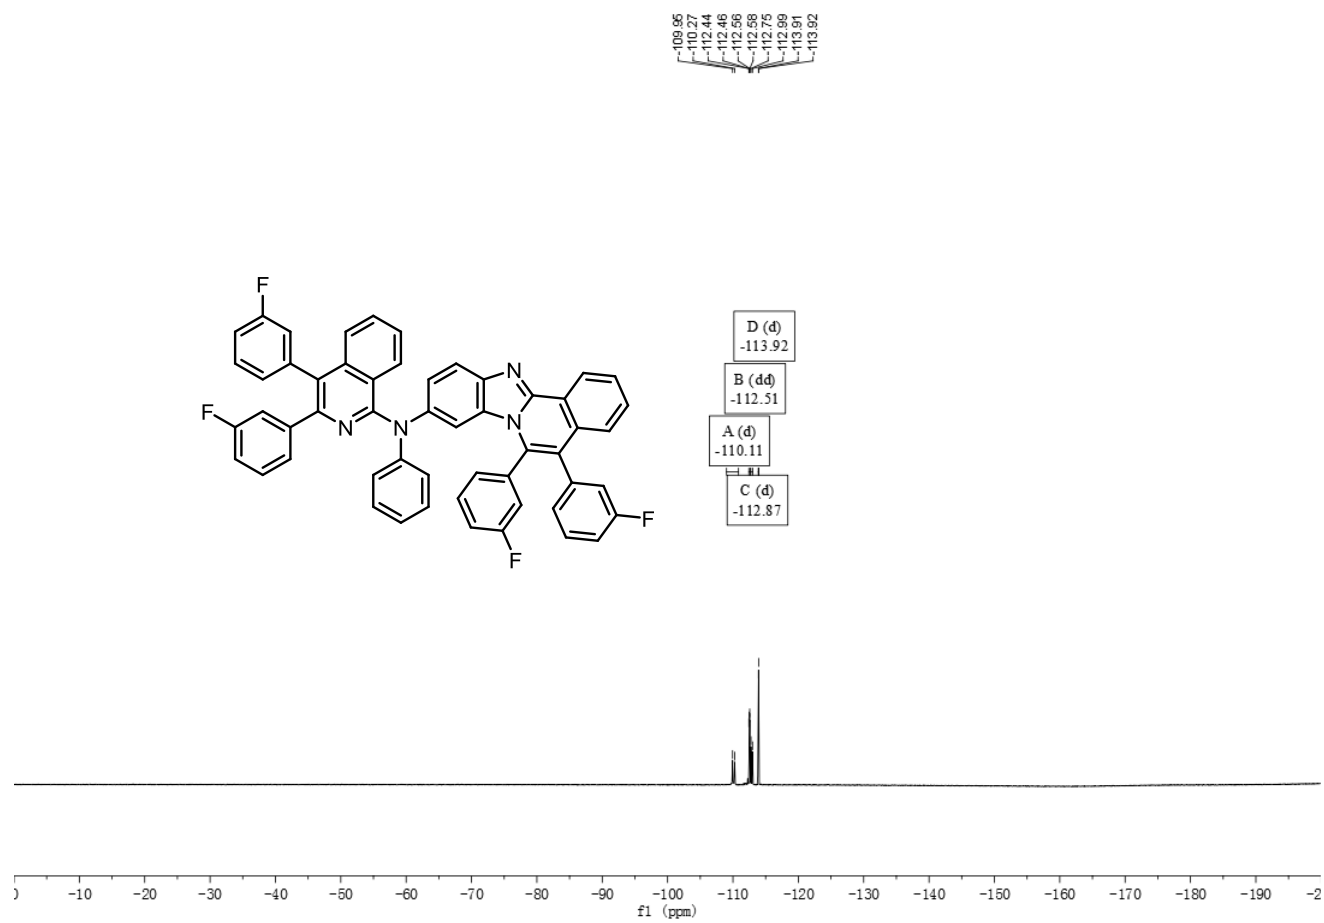

Clc1ccc(cc1)c2c3ccccc3n(c2N(c4ccccc4)c5ccc6c7ccccc7n8c6c9ccccc9c58)c10ccccc10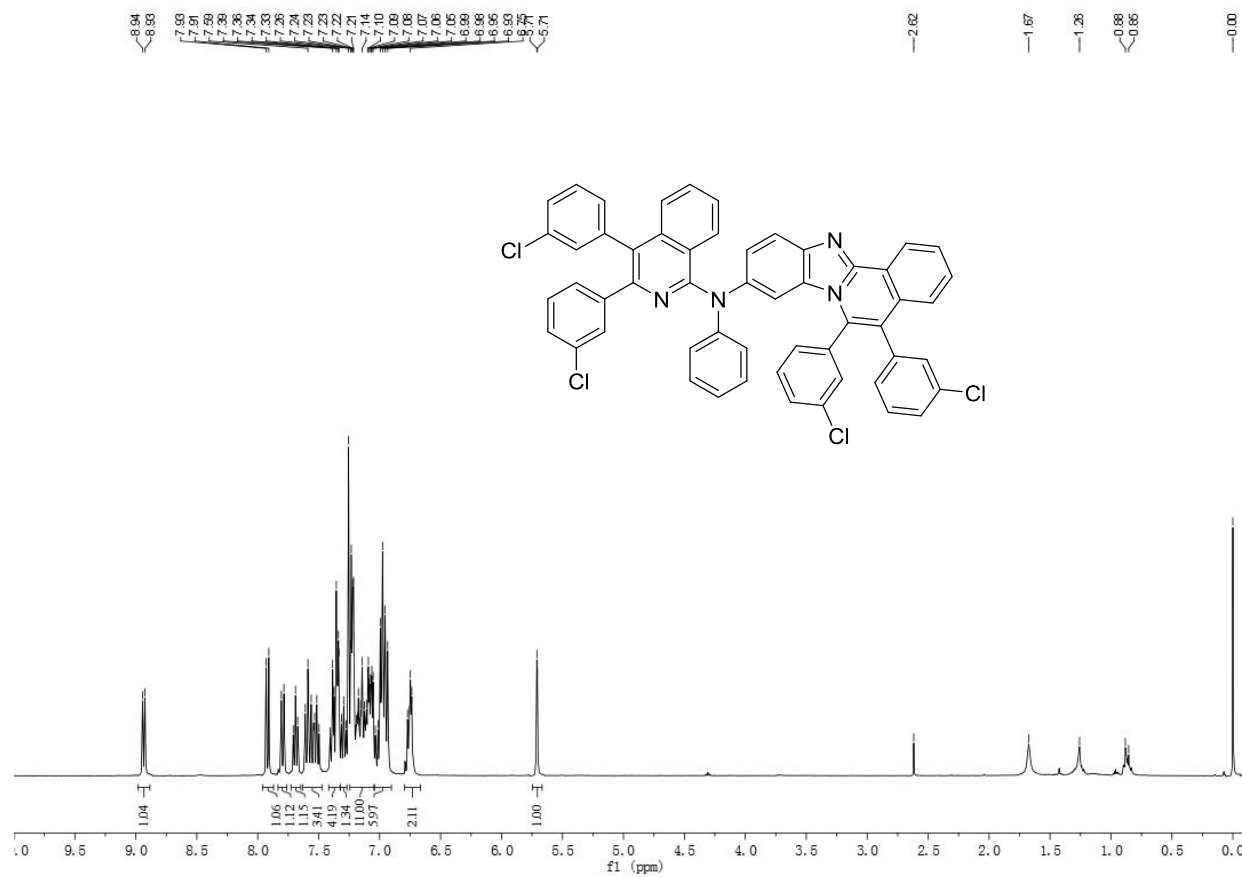



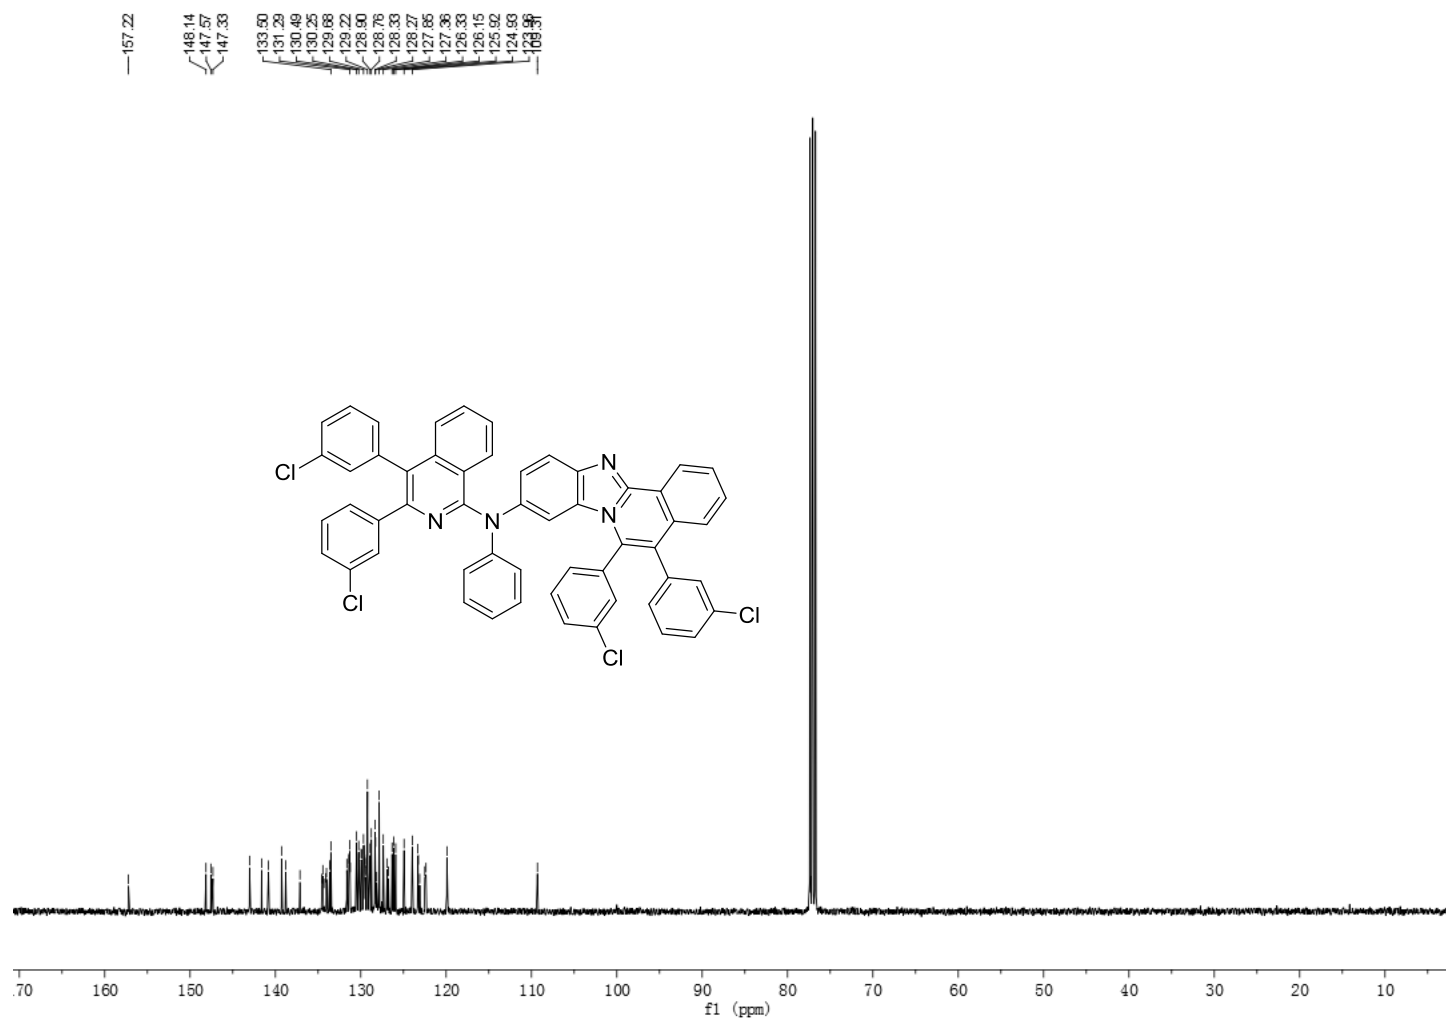

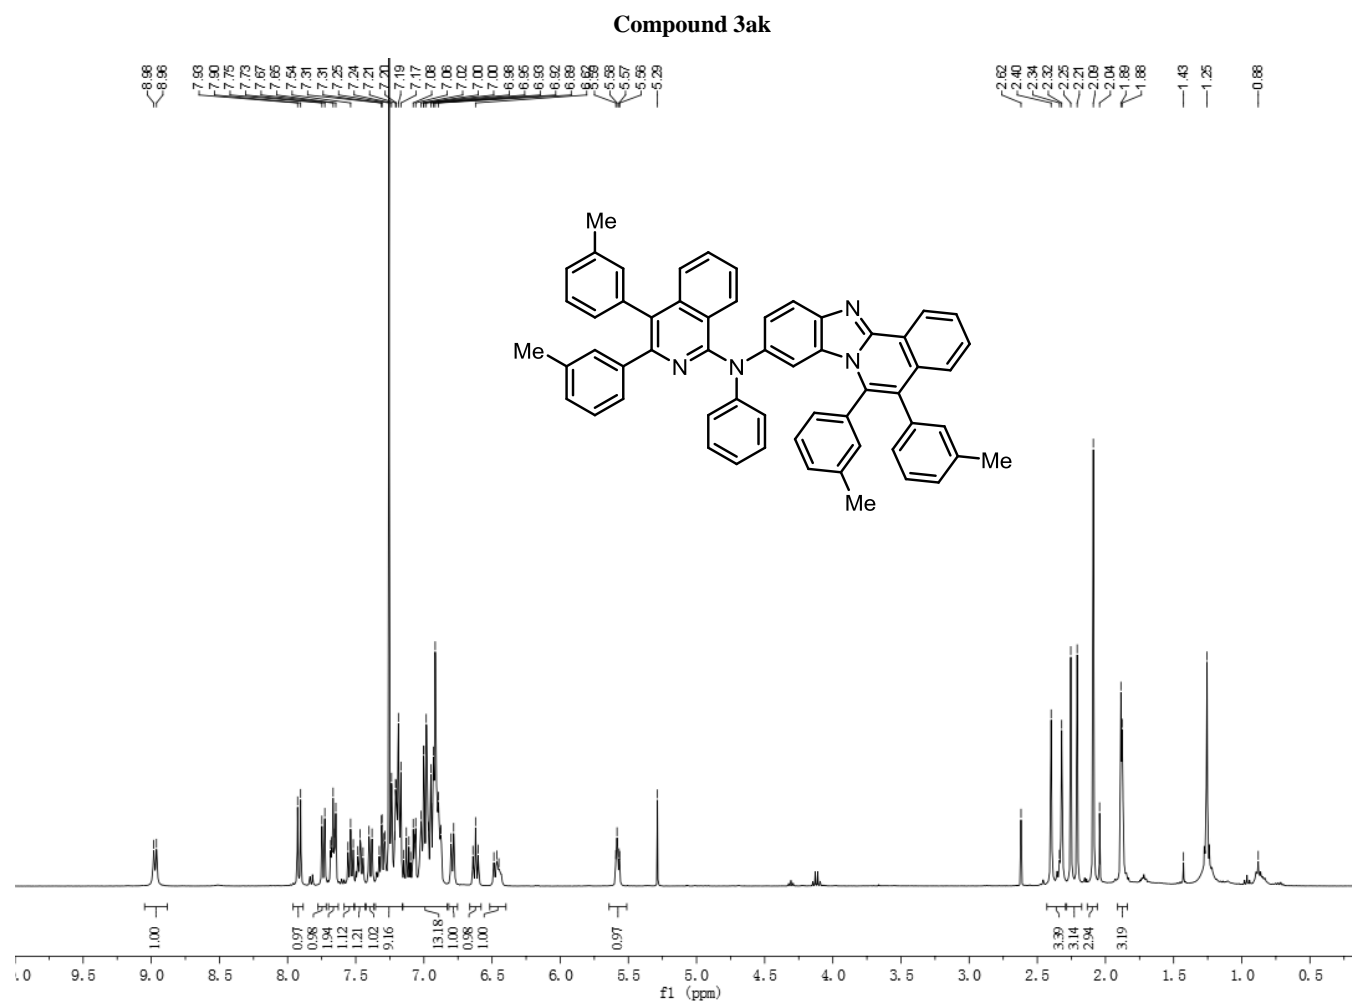

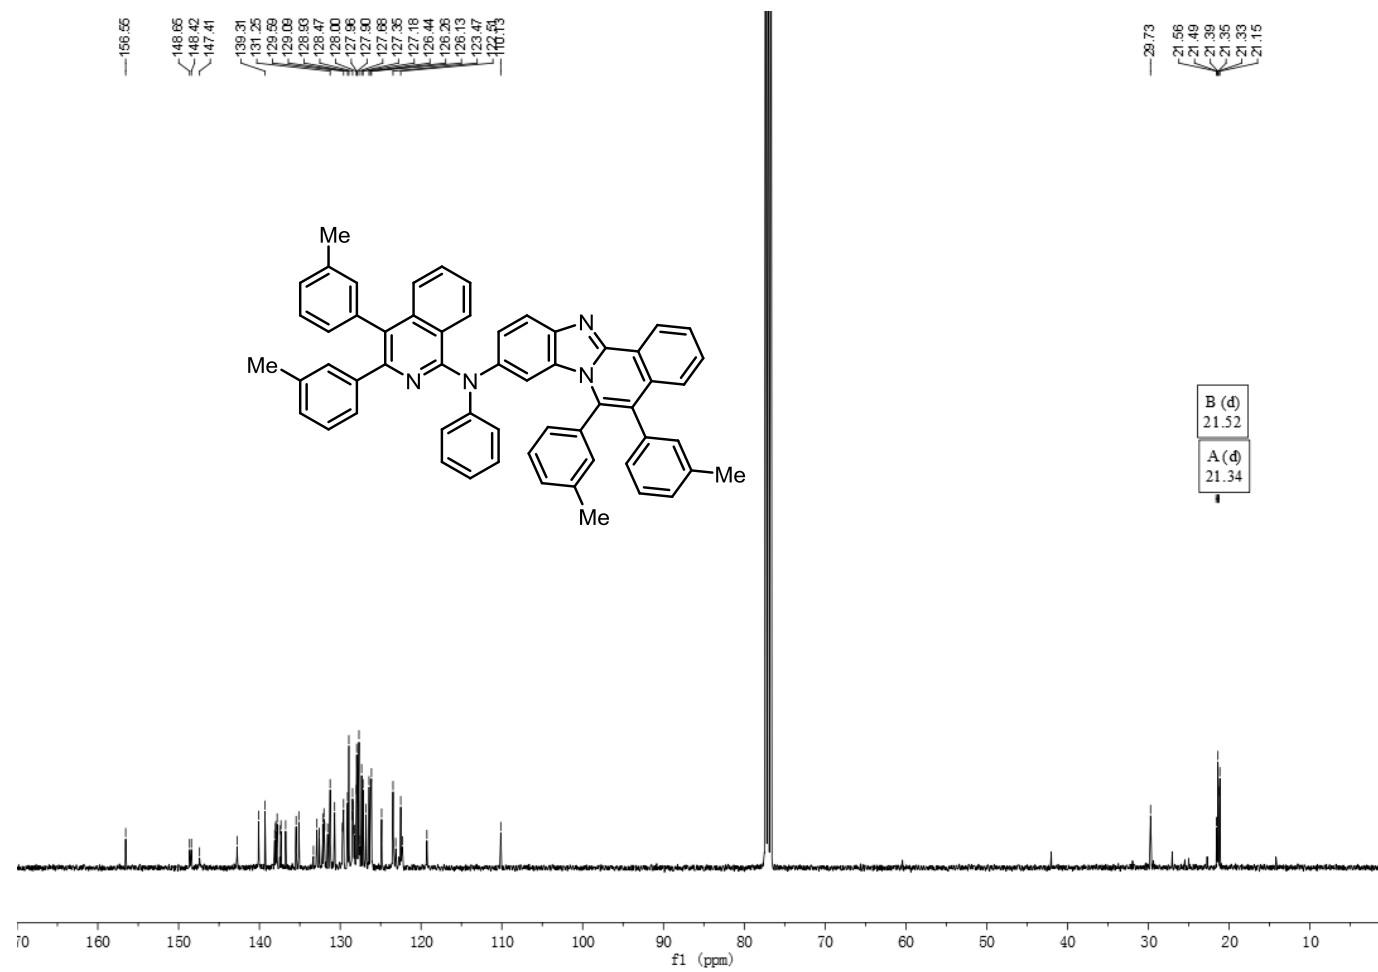

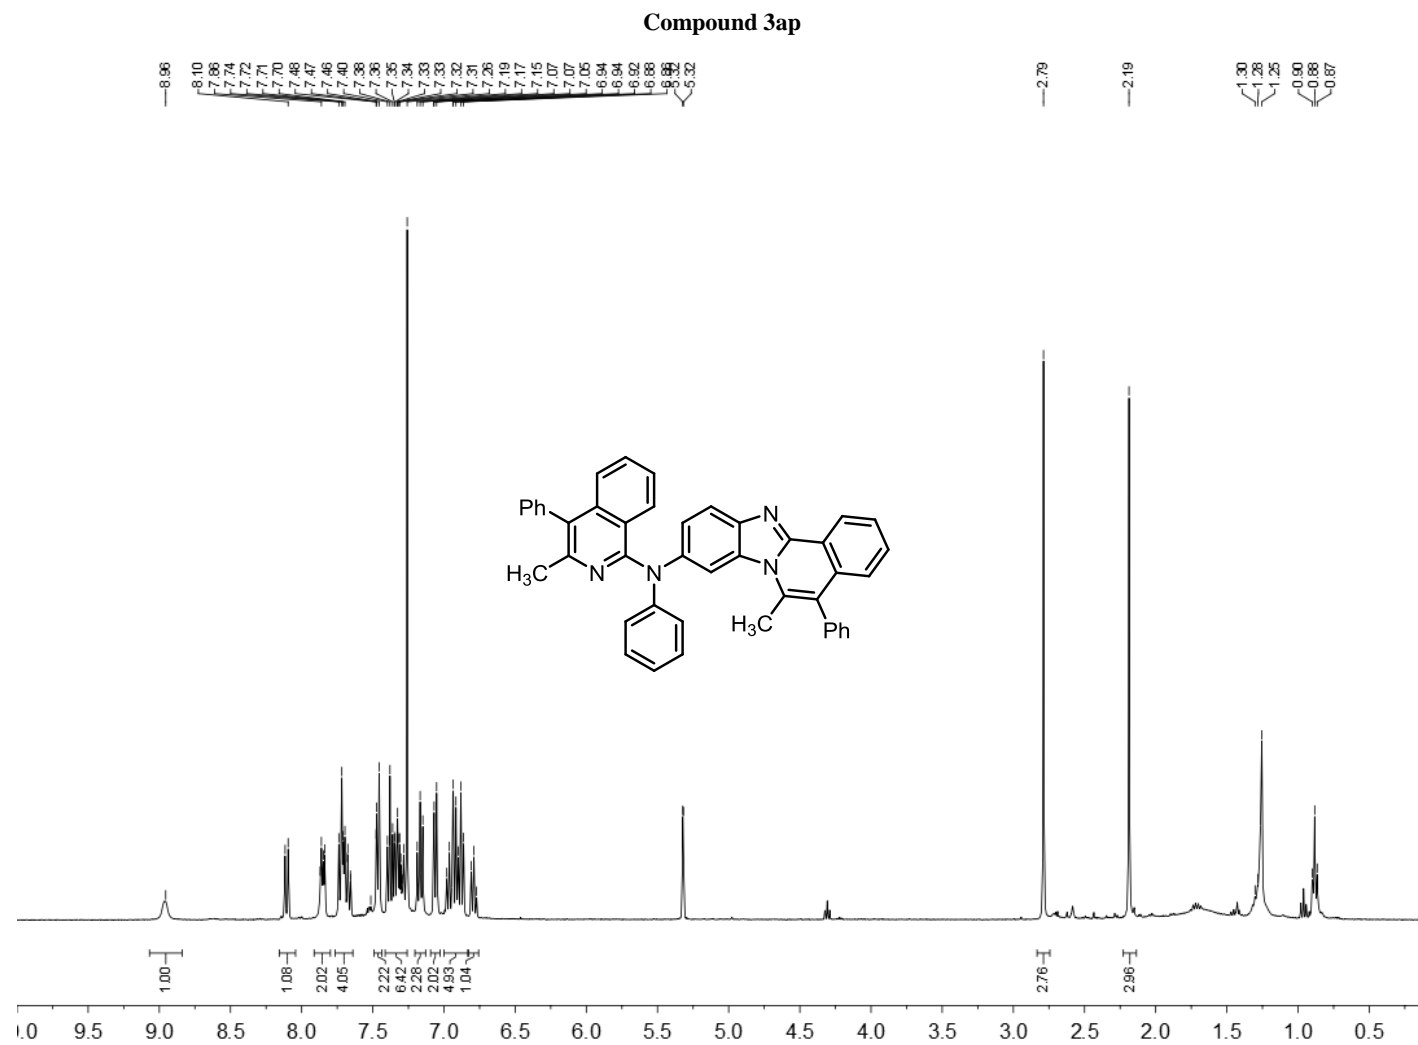

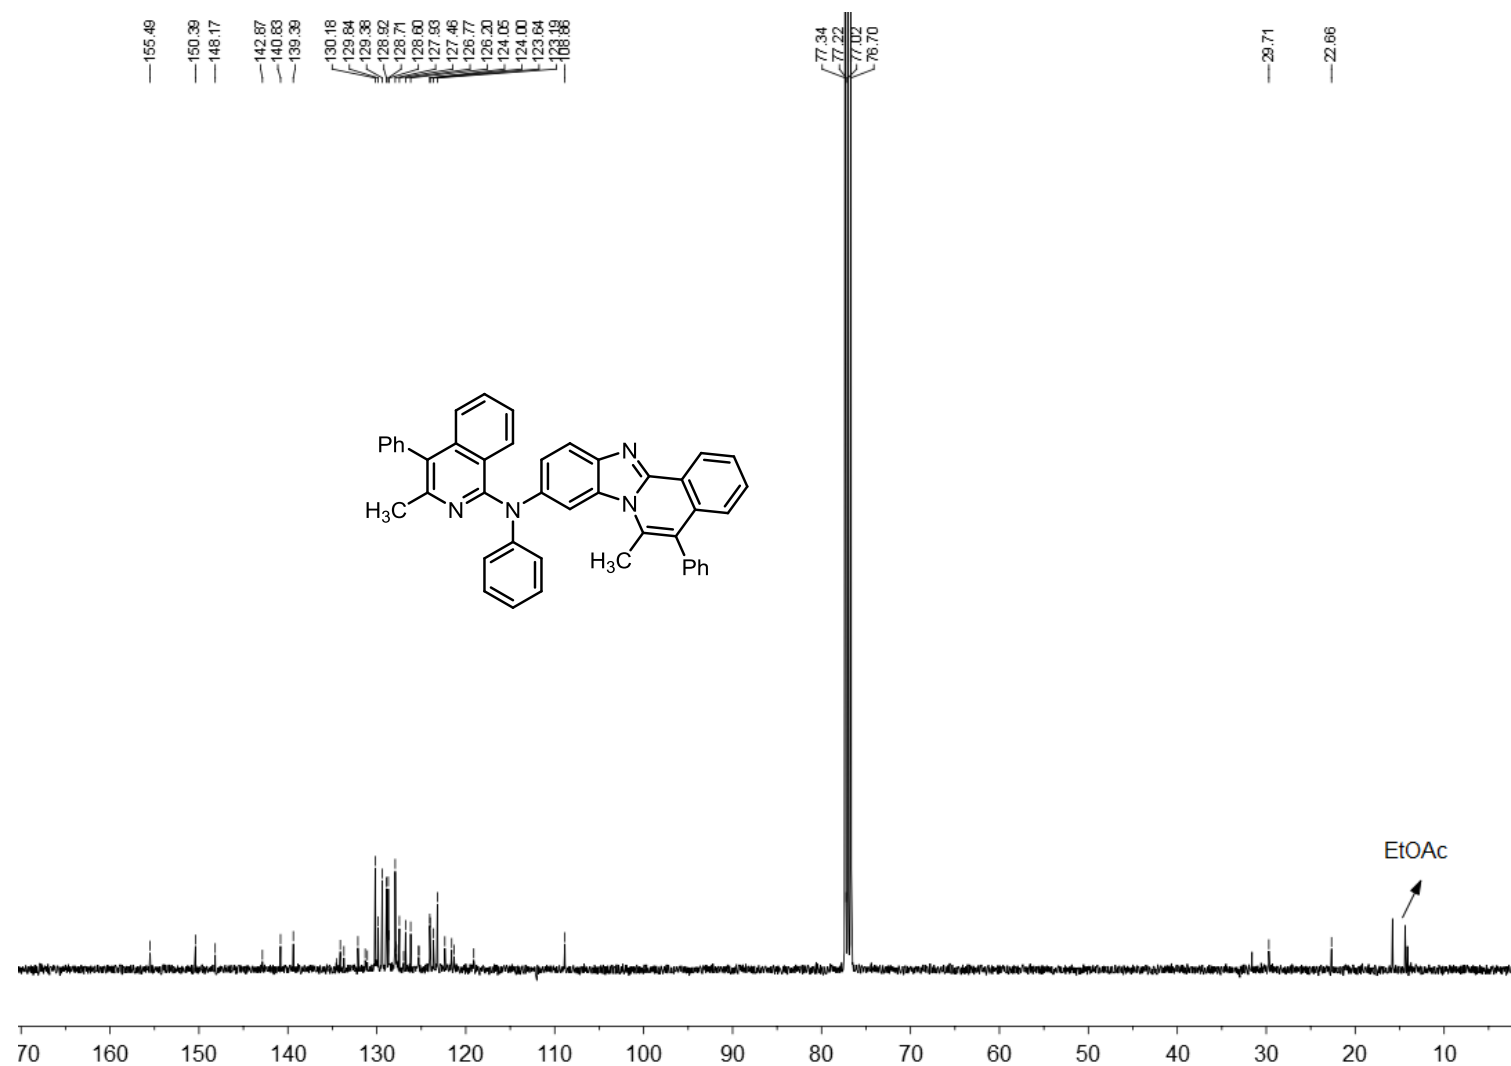

## **9. Copy of HRMS Spectra**

## Compound 3aa

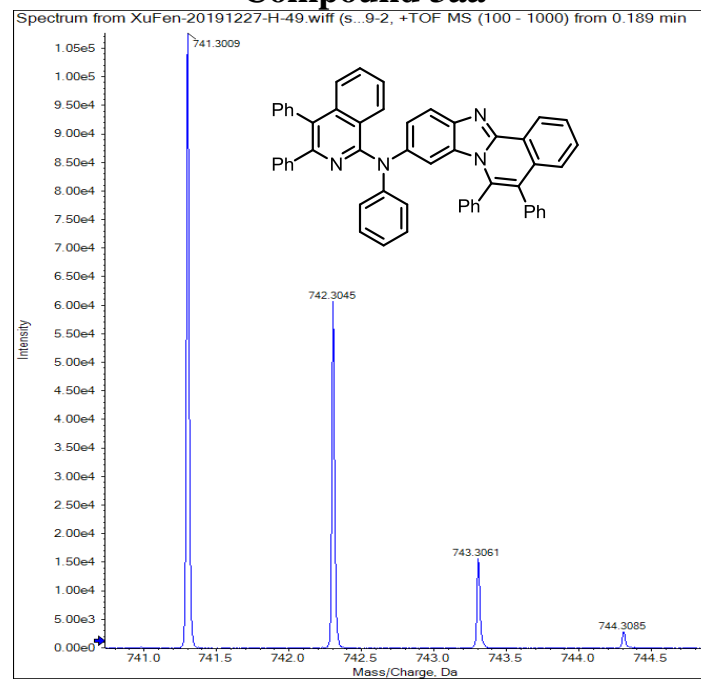

## Compound 3ba

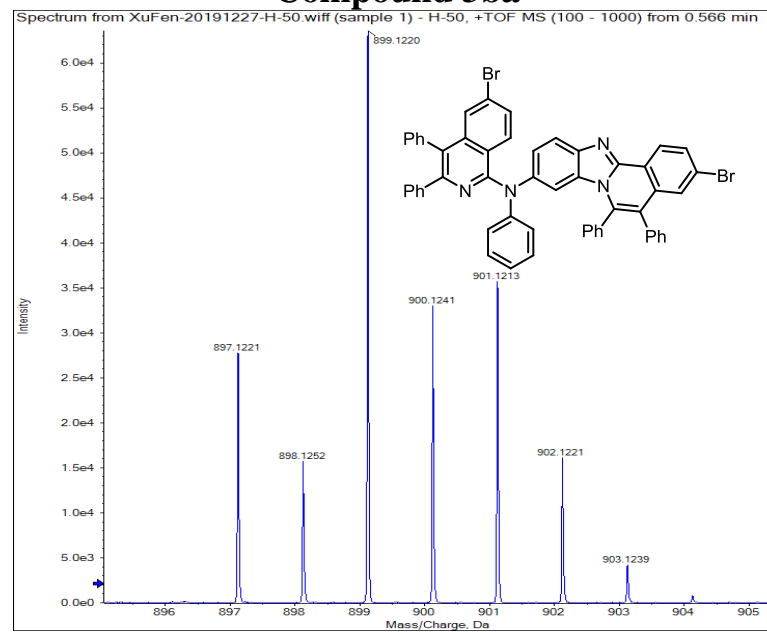



## Compound 3ca

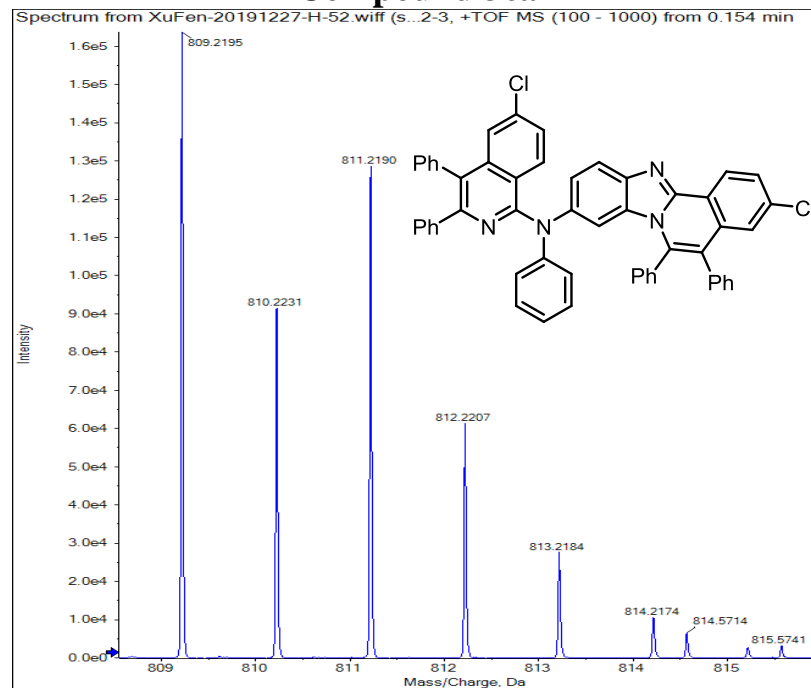

## Compound 3da

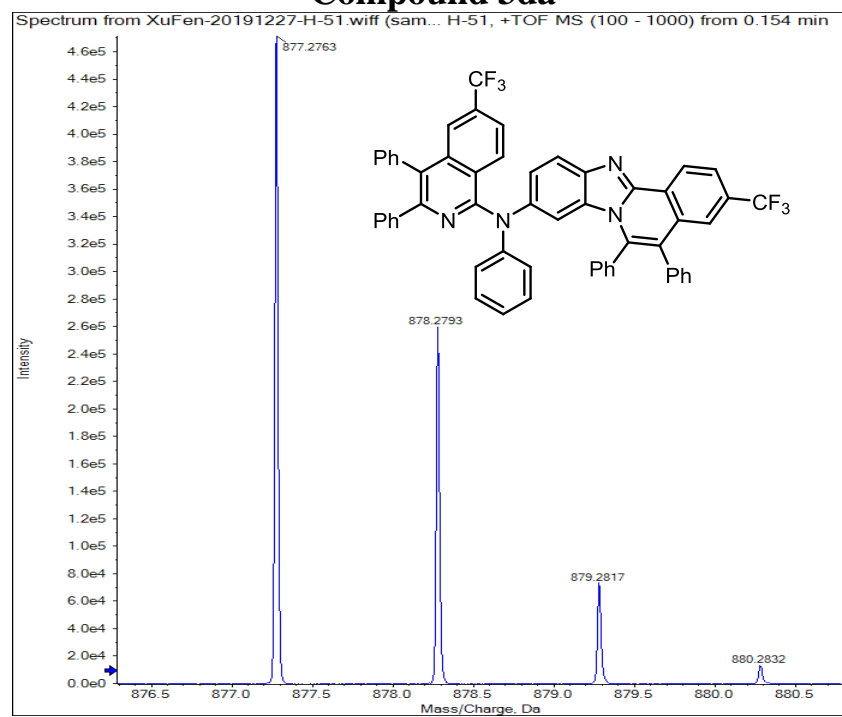

## Compound 3ea

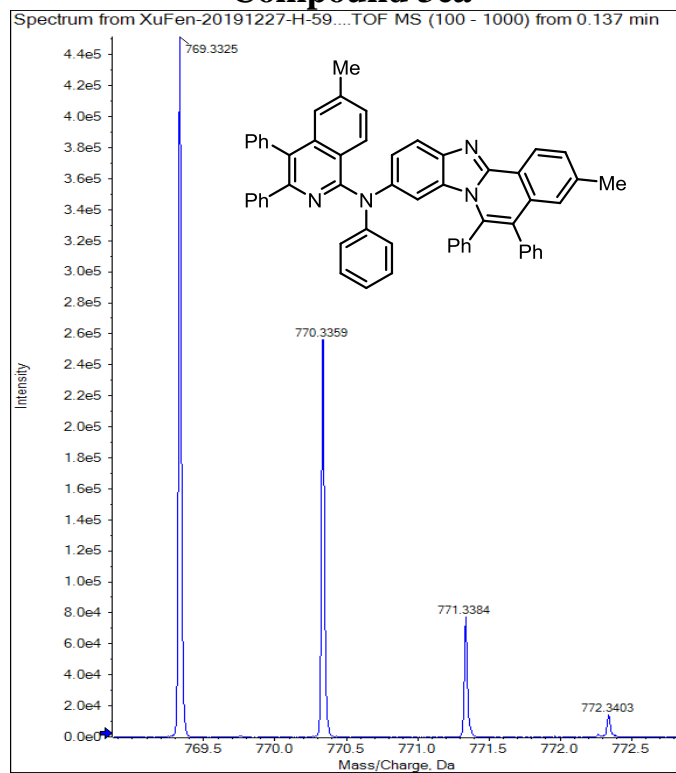

## Compound 3fa

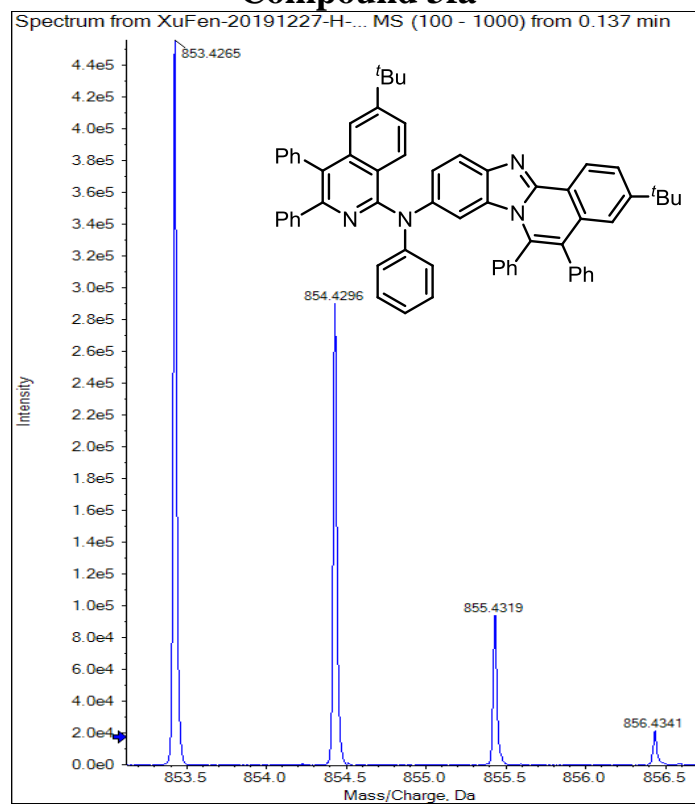

## Compound 3ga

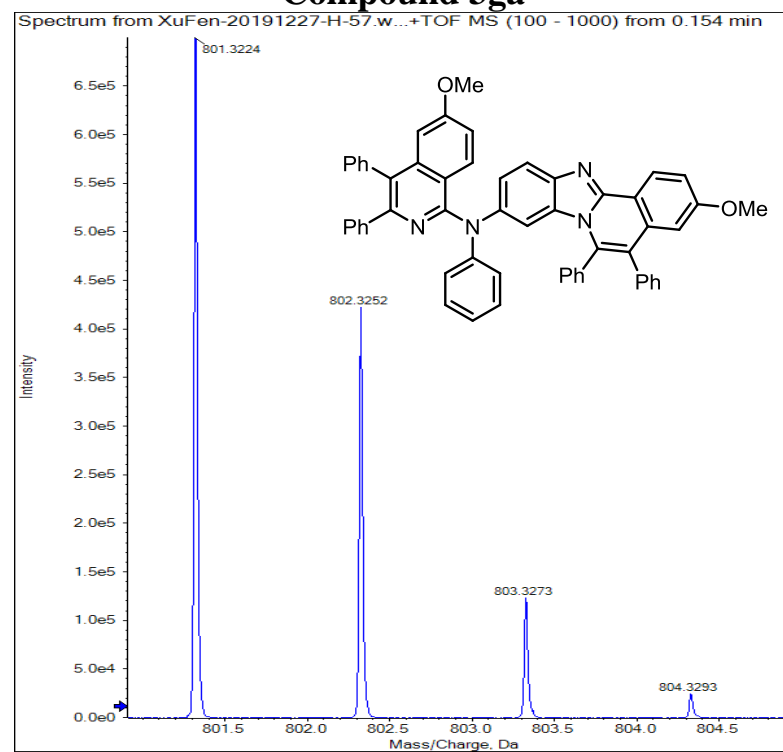

## Compound 3ha

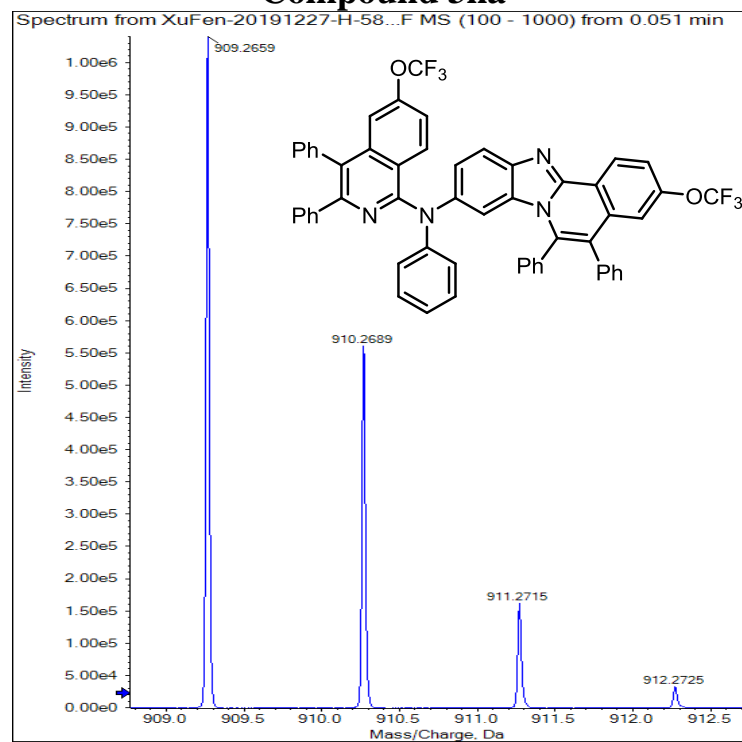

## Compound 3ia

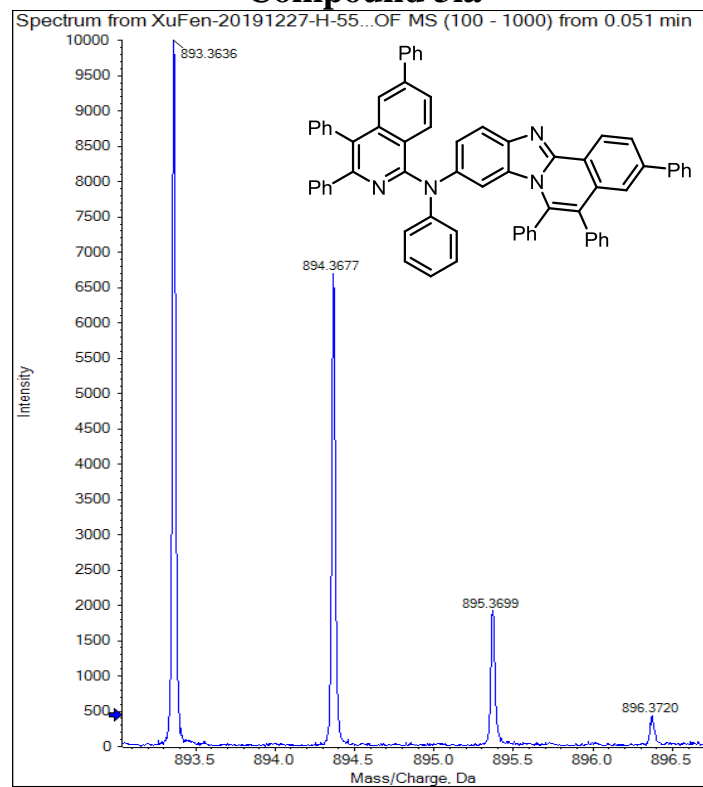

## Compound 3ja

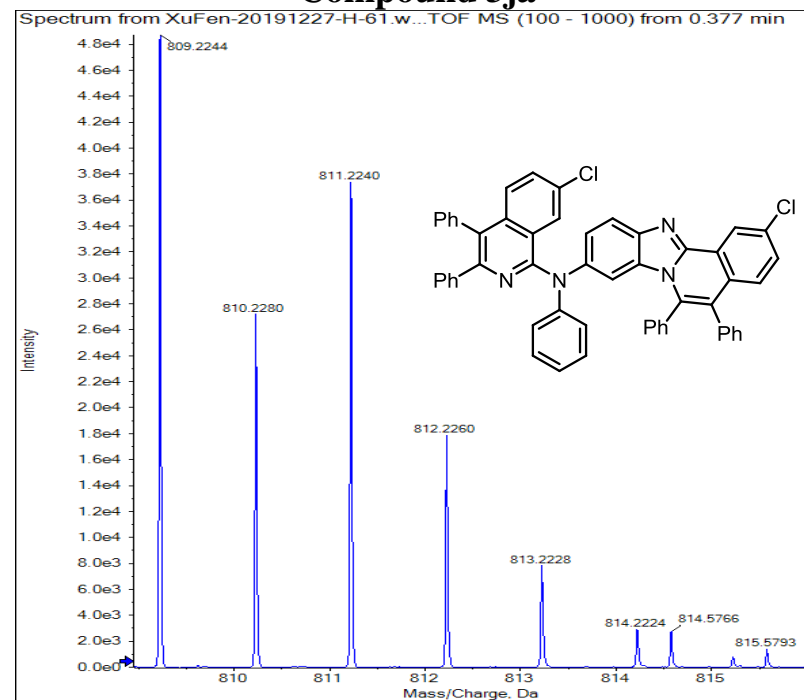



## Compound 3ka

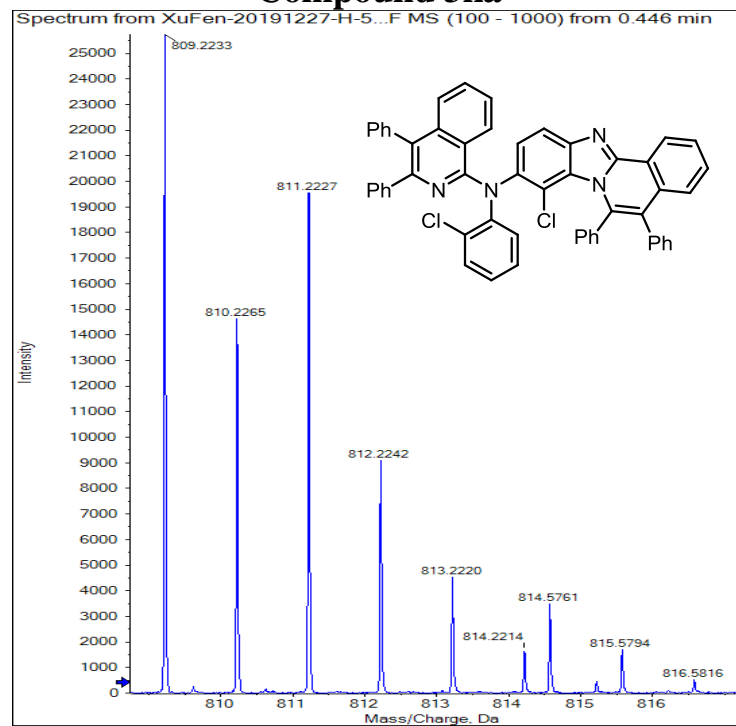

## Compound 3la

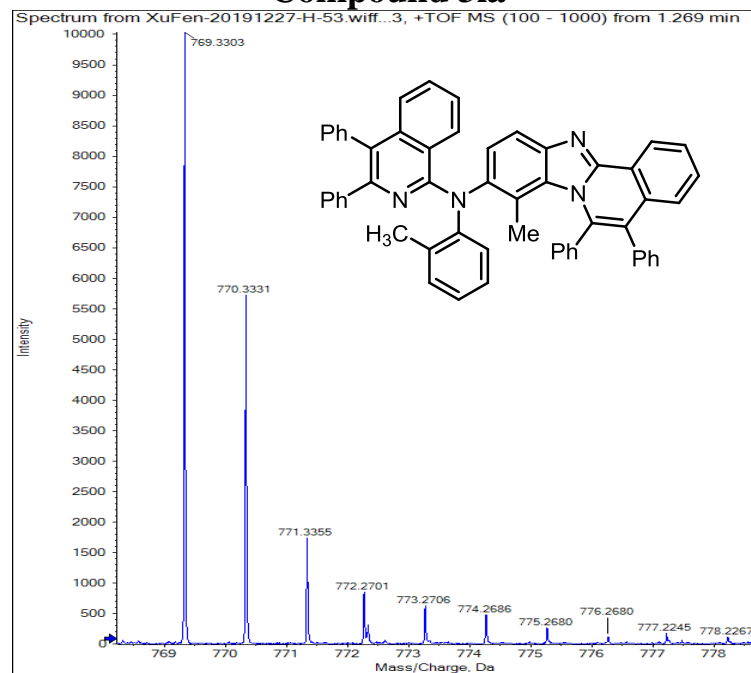

## Compound 3ma

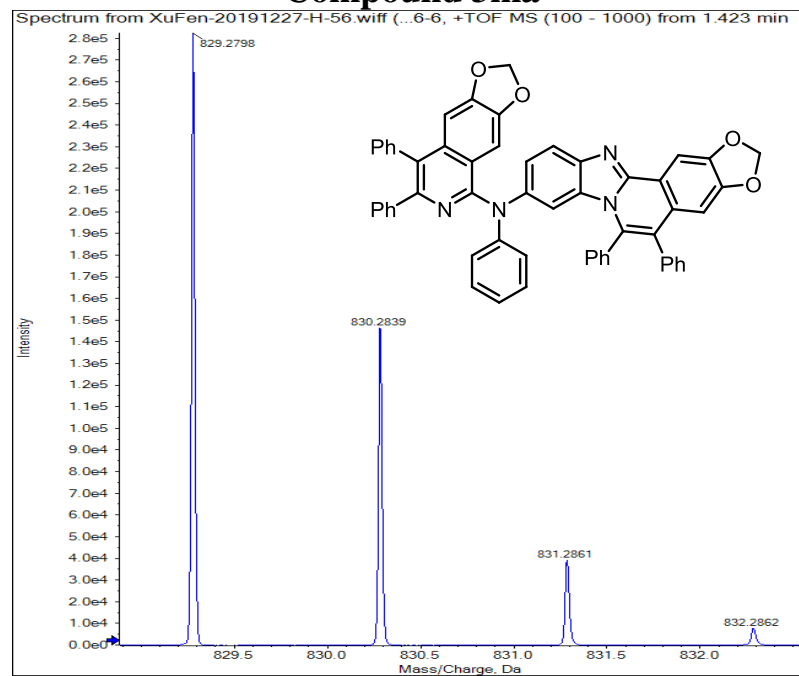

## Compound 3na

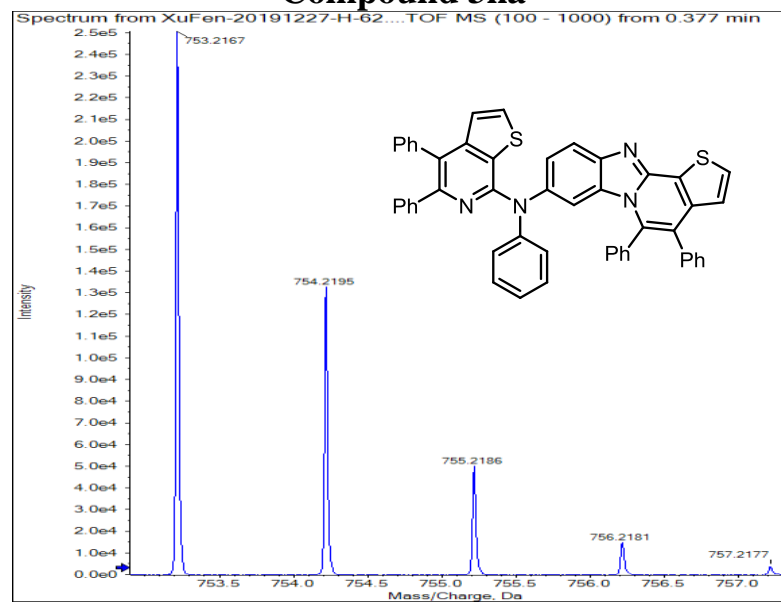

## Compound 3ab

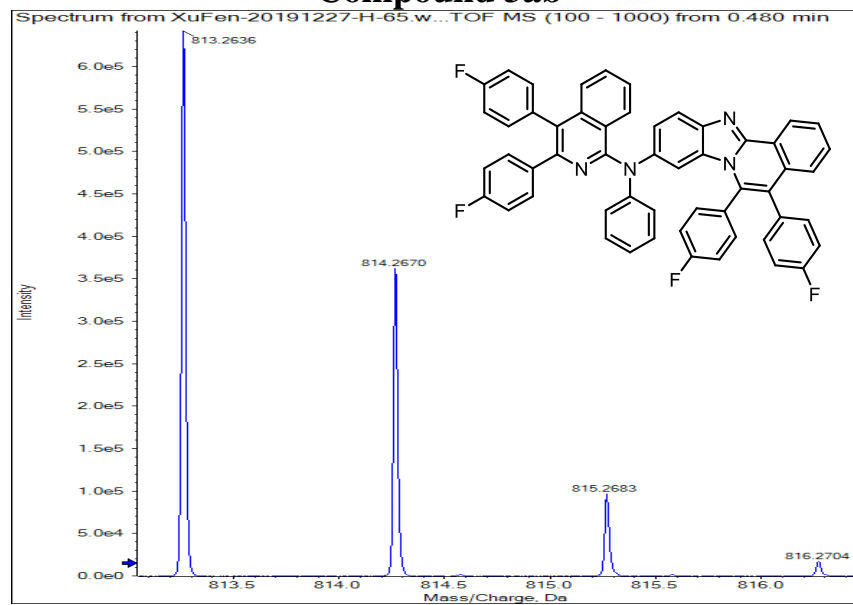

## Compound 3ac

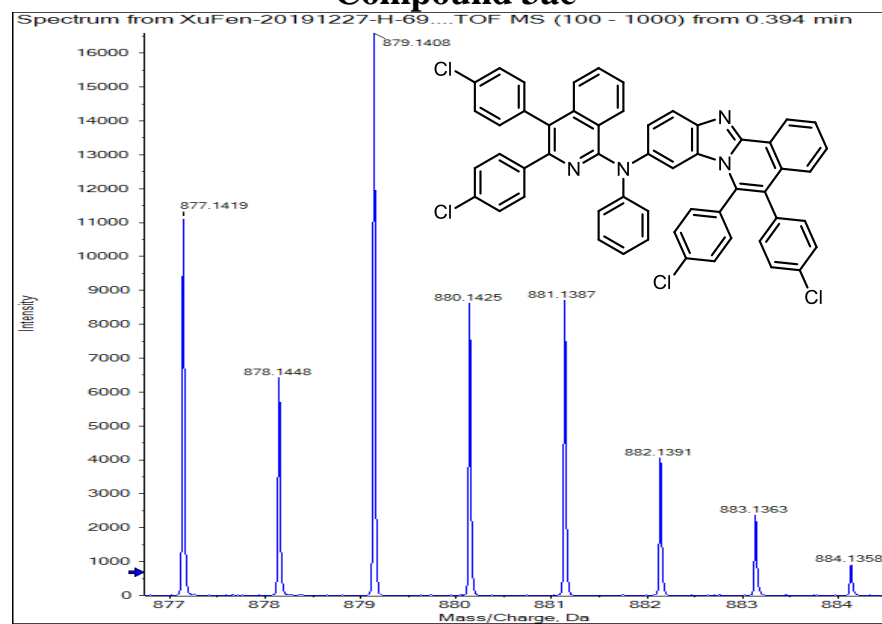

### Compound 3ad

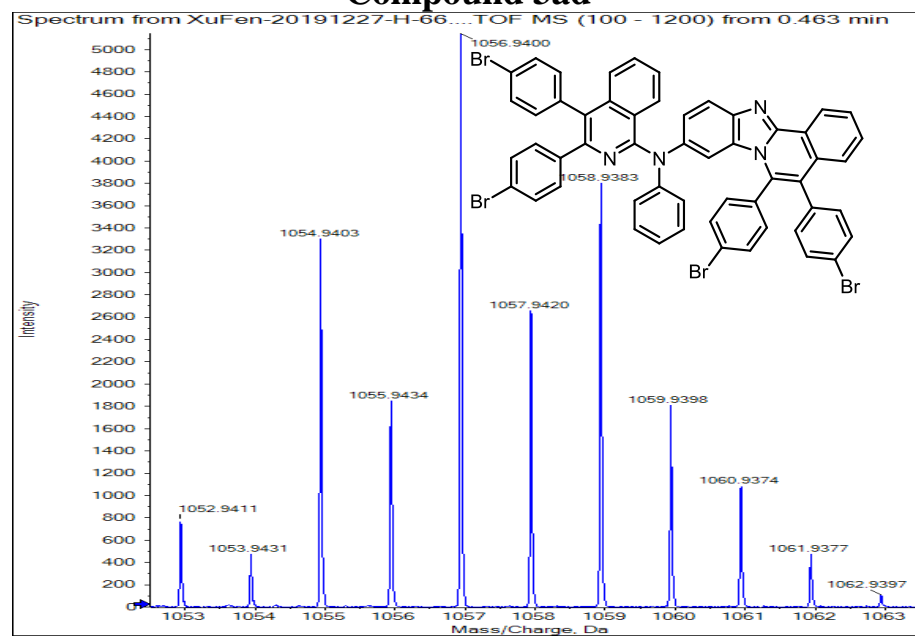

## Compound 3ae

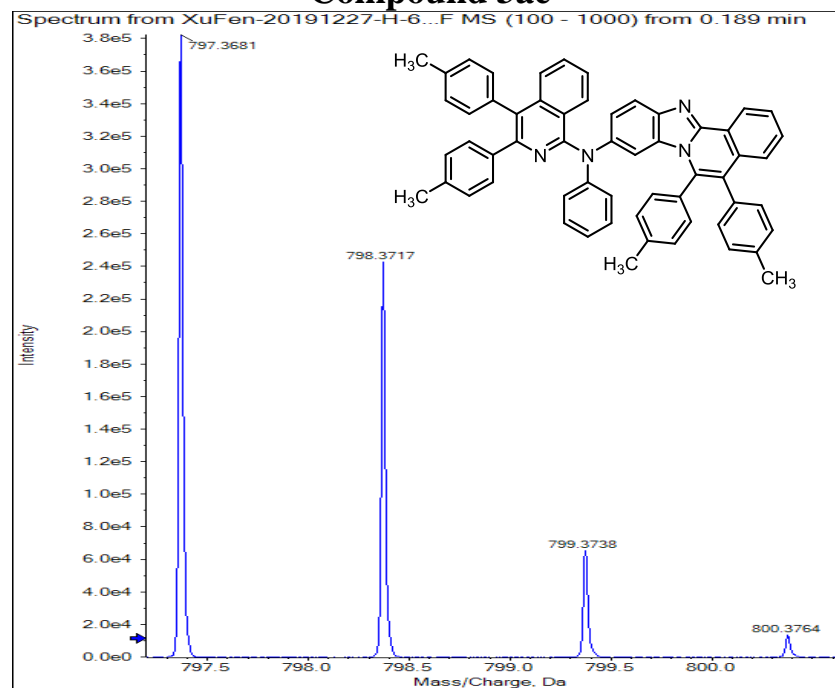



## Compound 3af

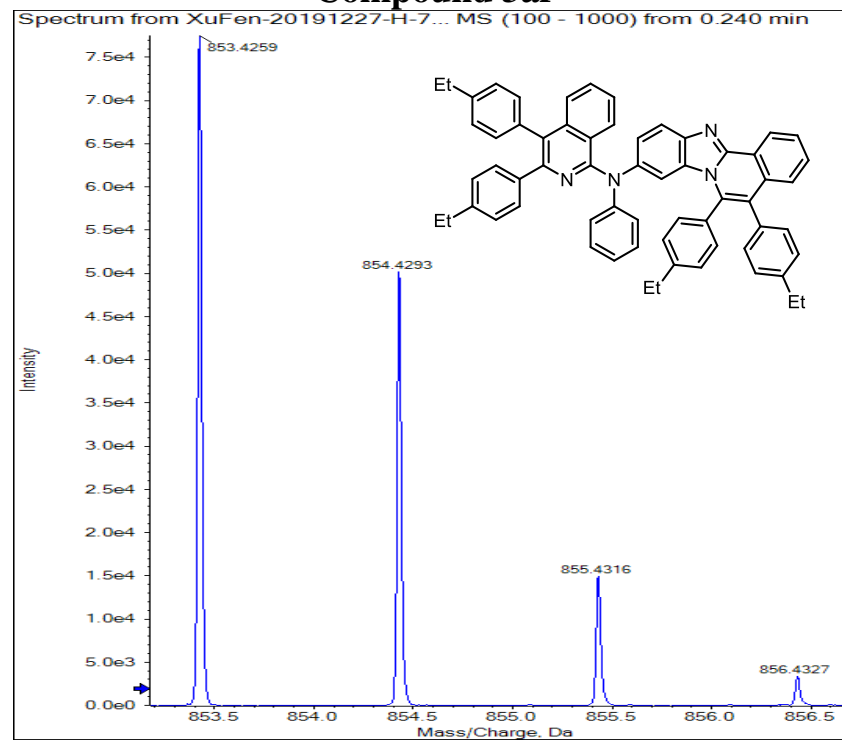

## Compound 3ag

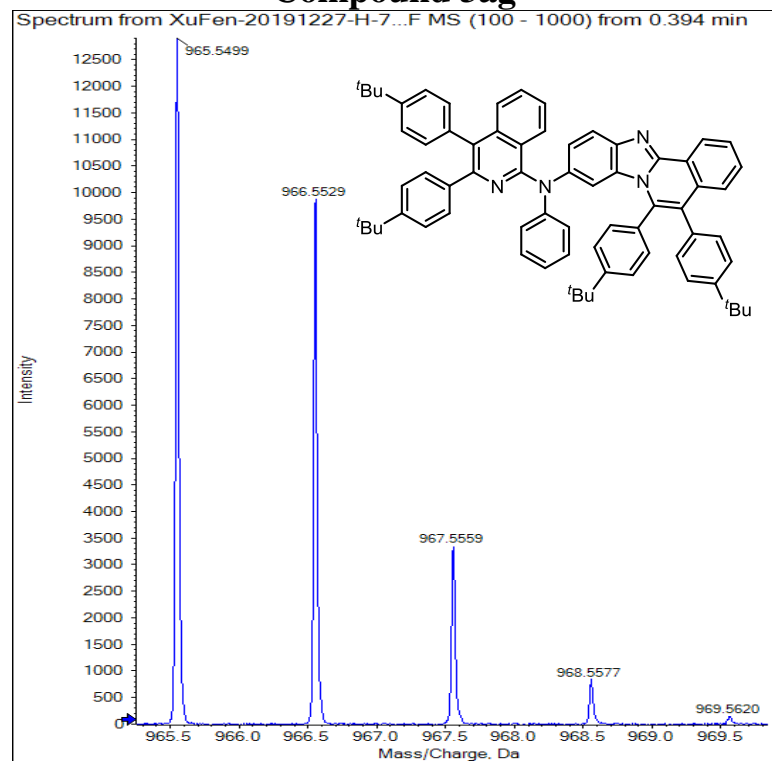

## Compound 3ah

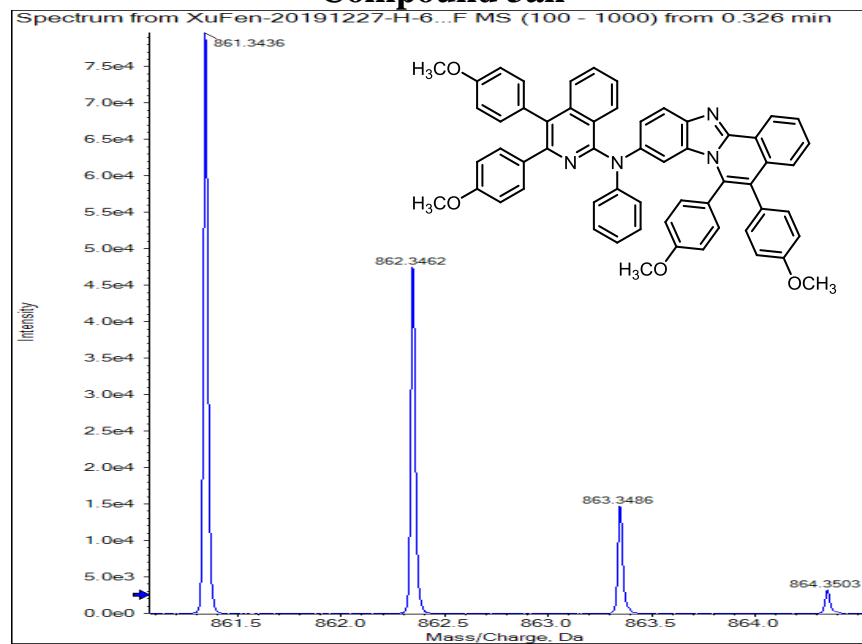

### Compound 3ai

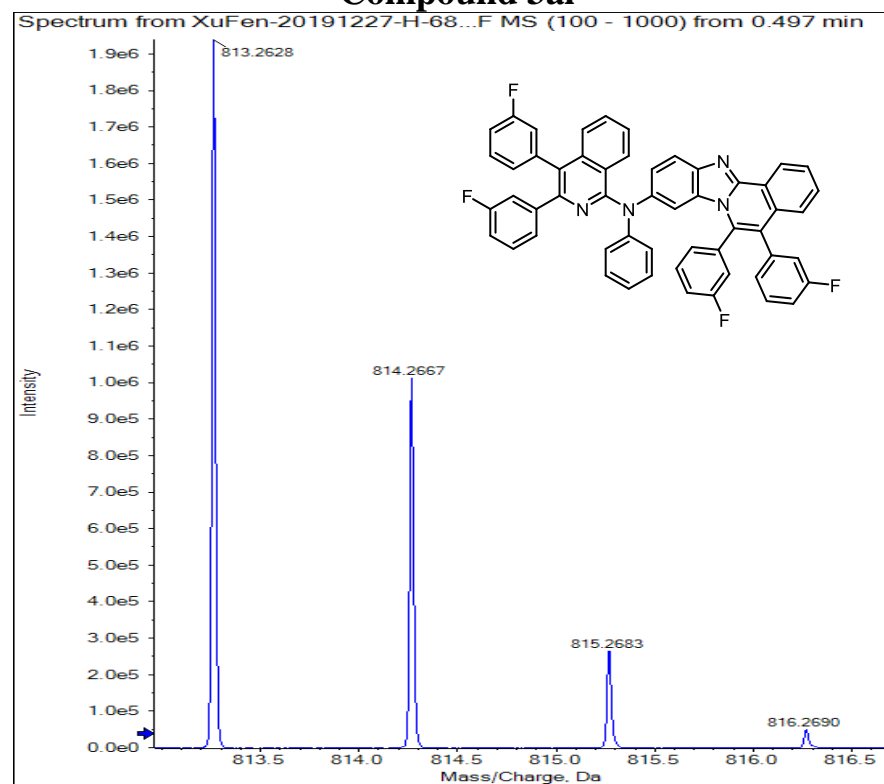

### Compound 3aj

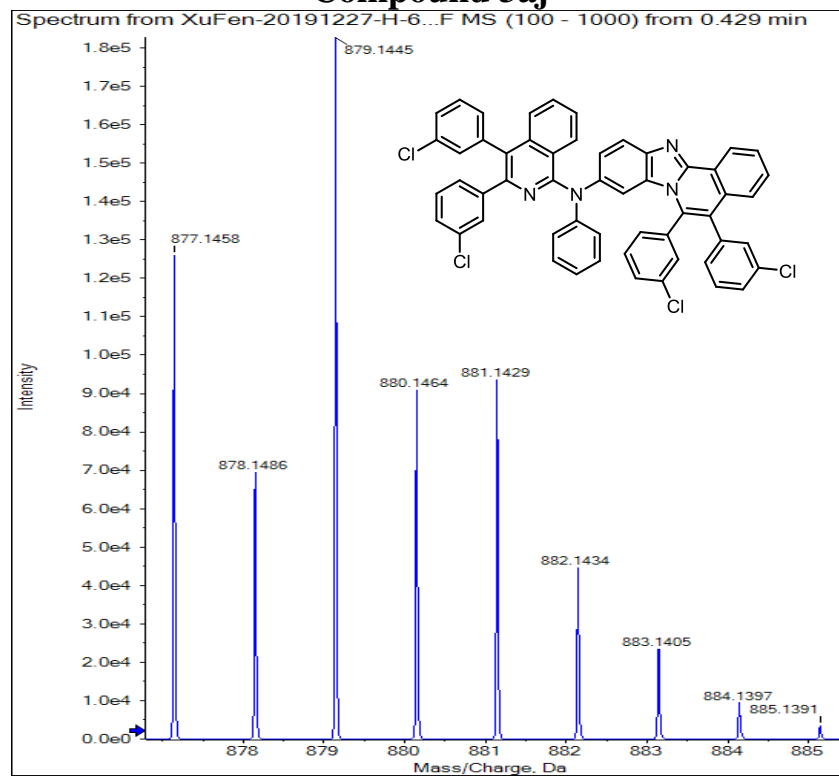

## Compound 3ak

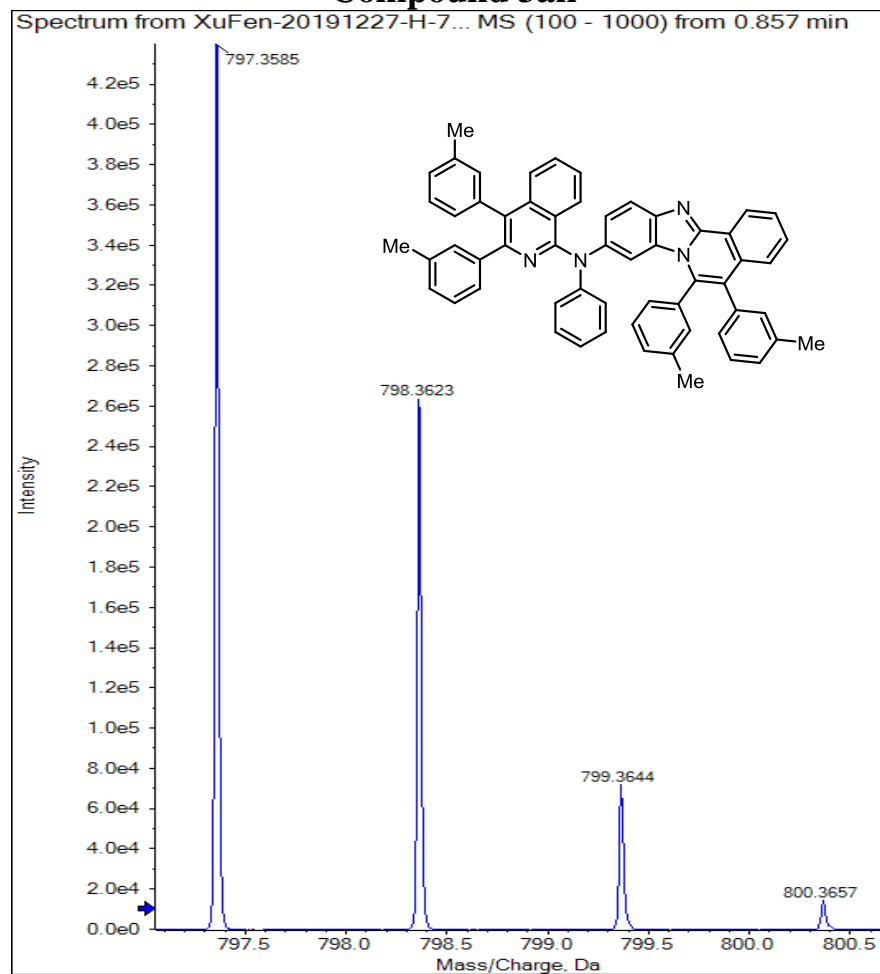

Supplement: d0cc04885b1.pdf [file d0cc04885b1.pdf]
